# Supplementary material for: CPA-catalyzed asymmetric domino thia-Michael/aldol reactions for simultaneous chiral center and axial chirality formation
Source: Royal Society of Chemistry journal article supplement (doi:10.1039/d3ob01087b), 2023-01-01
Supplement: d3ob01087b1.pdf [file d3ob01087b1.pdf]

## Supporting Information

# CPA-catalyzed asymmetric domino thia-Michael/aldol reactions for simultaneous chiral centers and axial chirality formation

Xilong Wang,<sup>a,b</sup> Yu Luo,<sup>a,b</sup> Jiaji Zhao,<sup>\*,c</sup> and Shuang Luo <sup>\*,a,b</sup>

<sup>a</sup> State Key Laboratory of Respiratory Disease, Guangzhou Institutes of Biomedicine and Health, Chinese Academy of Sciences, 190 Kaiyuan Avenue, Guangzhou 510530, China.

<sup>b</sup> University of Chinese Academy of Sciences, No.19(A) Yuquan Road, Shijingshan District, Beijing, 100049, China.

<sup>c</sup> School of Medicine and Chemical Engineering, Guangdong Pharmaceutical University, Zhongshan 528400, China

## Contents

|    |                                                                    |    |
|----|--------------------------------------------------------------------|----|
| 1. | General Information .....                                          | 2  |
| 2. | Synthetic Procedures.....                                          | 2  |
| 3. | CPA-Catalyzed Asymmetric Domino Thia-Michael/Aldol Reactions ..... | 3  |
| 4. | Derivatization of the Products .....                               | 4  |
| 5. | Computational Details .....                                        | 4  |
| 6. | X-ray Crystal Structure of Enantiopure .....                       | 7  |
| 7. | Characterization Data for the Products .....                       | 9  |
| 8. | Copies of NMR Spectra and NOE .....                                | 42 |
| 9. | References .....                                                   | 87 |

## 1. General Information

Unless otherwise noted, all chemicals were purchased from commercial suppliers and used without further purification.  $^1\text{H}$  NMR and  $^{13}\text{C}$  NMR spectra were recorded at ambient temperature on a 500 MHz NMR spectrometer (125 MHz for  $^{13}\text{C}$ ). NMR experiments were reported in  $\delta$  units, parts per million (ppm), and were referenced to  $\text{CDCl}_3$  ( $\delta$  7.26 or 77.0 ppm) as the internal standard. The coupling constants  $J$  were given in Hz. High-resolution mass spectra (HRMS) were obtained using a Bruker micro-TOF II focus spectrometer (ESI). Column chromatography was performed using EM Silica gel 60 (300-400 mesh). All melting points were uncorrected.

## 2. Synthetic Procedures

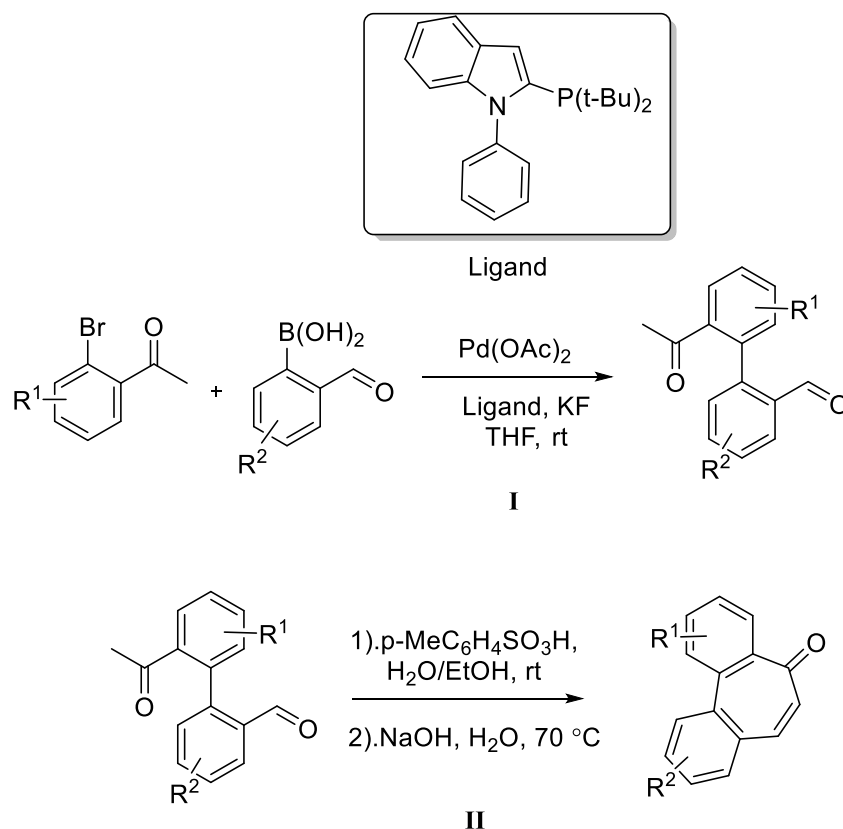

(I) 1-(2-bromophenyl) ethan-1-one (5.0 mmol), (2-formylphenyl) boronic acid (6.0 mmol, 1.2eq.), Pd (OAc)<sub>2</sub>(22.0 mg, 2.0 mol %), KF (870.0 mg, 15.0 mmol), and ligand (60 mg, 4.0 mol %) were sequentially added to an oven-dried microwave vial. The mixture was suspended in THF (15.0 mL) and stirred for 3h at rt. The reaction mixture was directly purified by silica gel column chromatography (hexanes/EtOAc, 16:1) to provide the corresponding 2'-acetyl-[1,1'-biphenyl]-2-carbaldehyde.

(II) Subsequently, to a solution of 2'-acetyl-[1,1'-biphenyl]-2-carbaldehyde (4.0 mmol) in H<sub>2</sub>O/EtOH (3 mL/7 mL) was added *p*-TsOH (172 mg, 8.0 mmol). The mixture was stirred at room temperature for 30 min, and then 20% aq. NaOH solution (32 mg, 0.8 mmol) was added. After being stirred at 70°C for 15 min, the resulting mixture was cooled to rt and diluted with water (20 mL). The aqueous layer was extracted with EtOAc (3×10 mL). The combined organic extracts were washed with brine, dried over MgSO<sub>4</sub>, and concentrated in vacuo. The residue was purified by silica gel column chromatography (hexanes/EtOAc, 16:1) to provide 5H-dibenzo[*a,c*][7]annulen-5-one.<sup>1</sup>

### 3. CPA-Catalyzed Asymmetric Domino Thia-Michael/Aldol

#### Reactions

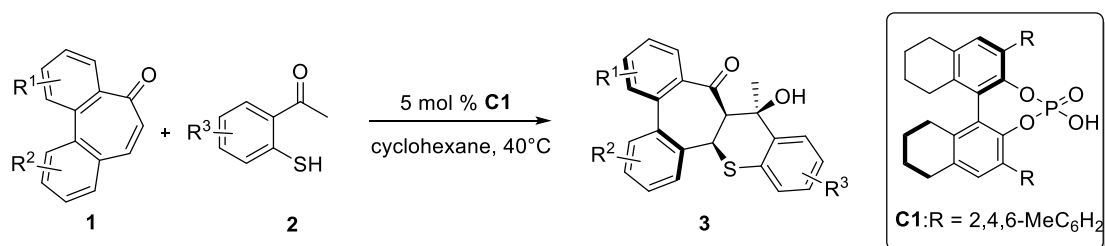

To a solution of 5H-dibenzo[*a,c*][7]annulen-5-one **1** (0.1 mmol, 1.0 eq.) in cyclohexane (1.5 mL) was added **C1** (5 mol%, 3.0 mg) and 1-(2-mercaptophenyl)ethan-1-one **2** (2.5 equiv). The mixture was vacuumed and refilled with N<sub>2</sub> for 3 times. The reaction mixture was stirred at 40 °C for 3.5 h. The reaction mixture was cooled to room temperature and the solvent was evaporated under reduced pressure and the residue was

purified on a silica gel column (hexane/EtOAc, 30:1) to obtain the corresponding 10-hydroxy-10-methyl-9a,15a-dihydrodibenzo [4,5:6,7] cyclohepta[1,2-b] thiochromen-9(10H)-one **3**.

#### 4. Derivatization of the Products

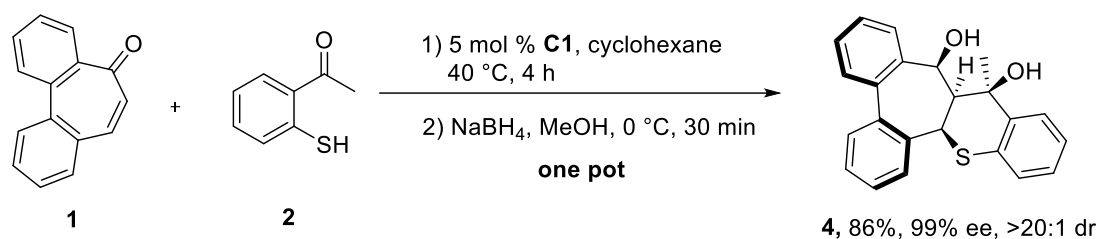

To a solution of 5H-dibenzo[a,c][7]annulen-5-one **1** (0.1 mmol, 1.0 eq.) in cyclohexane (1.5 mL) was added **C1** (5 mol%, 3.0 mg) and 1-(2-mercaptophenyl)ethan-1-one **2** (2.5 equiv). The mixture was vacuumed and refilled with N<sub>2</sub> for 3 times. The reaction mixture was stirred at 40 °C for 3.5 h. The reaction mixture was cooled to room temperature and the solvent was evaporated under reduced pressure. At 0 °C, sodium borohydride (1.5 eq.) was added dropwise to the reaction system by dissolving it in MeOH (1 mL), and the mixture reacted for 30 minutes. The reaction mixture was cooled to room temperature and the solvent was evaporated under reduced pressure and the residue was purified on a silica gel column (hexane/EtOAc, 4:1) to obtain the corresponding (9S,9aS,10R,15aR)-10-methyl-9,9a,10,15a-tetrahydrodibenzo [4,5:6,7] cyclohepta[1,2-b] thiochromene-9,10-diol **4**.

#### 5. Computational Details

DFT calculations were performed using the Gaussian 16 suite of programs.<sup>2</sup> Equilibrium structures and transition states were fully optimized using B3LYP-D3(BJ) density functional method<sup>3</sup> with the 6-31G(d,p) basis sets,<sup>4</sup> while single point energies were computed at B3LYP-D3(BJ)/def2TZVP level.<sup>5</sup> Frequency analyses at 298 K were performed on B3LYP/6-31G\*\* optimized geometries to obtain thermodynamic corrections and to confirm the nature of the stationary points as equilibrium structures

(with all real frequencies) or transition states (with only one imaginary frequency), and relative free energies,  $\Delta G_{298}$ , were reported in these cases. Connections between the key transition-state structures and the corresponding reactants and products were confirmed using intrinsic reaction coordinate calculations.<sup>6</sup> For all calculations mentioned above, the solvent effect was modeled using the SMD model with cyclohexane as the solvent.<sup>7</sup>

**Table S1.** Enthalpy corrections ( $\Delta H$ ), free energy corrections ( $\Delta G$ ) of stationary points computed at the M062X/6-31G(d,p) level, with single point electronic energies ( $E$ ), enthalpies ( $H$ ) and free energies ( $G$ ) computed at the M062X/def2TZVP level. All numbers are in hartrees.

| Structure      | $\Delta H$ | $\Delta G$ | $E$          | $H$          | $G$          |
|----------------|------------|------------|--------------|--------------|--------------|
| <b>3a-GS-1</b> | 0.371475   | 0.303628   | -1436.488937 | -1436.117462 | -1436.185309 |
| <b>3a-GS-2</b> | 0.371667   | 0.302768   | -1436.47356  | -1436.101893 | -1436.170792 |
| <b>3a-TS</b>   | 0.370845   | 0.303867   | -1436.471757 | -1436.100912 | -1436.16789  |

### Cartesian coordinates of DFT-computed structures

| <b>3a-GS-1</b> |             |             |             |   |             |             |             |
|----------------|-------------|-------------|-------------|---|-------------|-------------|-------------|
| C              | -1.48441900 | -1.28058100 | 0.22151800  | C | 3.51924600  | 0.21331100  | 0.35790000  |
| C              | -2.48113600 | -0.20920300 | -0.02250500 | O | 0.58494300  | 0.26708300  | 2.68691700  |
| C              | -2.10972900 | 1.08950100  | -0.42611000 | C | 1.77935800  | 3.15549700  | -0.34294700 |
| C              | -0.66825100 | 1.50527700  | -0.58688200 | O | 2.20876100  | 2.22084800  | 1.76277100  |
| C              | 0.11105200  | 1.51212200  | 0.72954400  | H | -0.66904200 | 2.53561700  | -0.94408200 |
| C              | 0.09592900  | 0.22841600  | 1.55846200  | H | 1.42603200  | -1.96827100 | 1.85302400  |
| C              | -0.31791900 | -1.08189700 | 0.98709600  | H | 0.97262400  | -4.23610400 | 0.92936800  |
| C              | 0.54062700  | -2.15689200 | 1.25771700  | H | -1.07364100 | -4.60286400 | -0.44729100 |
| C              | 0.28393700  | -3.41944400 | 0.73969700  | H | -2.62589800 | -2.73187200 | -0.87298400 |
| C              | -0.86239600 | -3.62306100 | -0.03012900 | H | -4.12890600 | -1.49581000 | 0.46429800  |
| C              | -1.73904000 | -2.56929400 | -0.27005700 | H | -5.87317300 | 0.19544000  | 0.00741000  |
| C              | -3.84364000 | -0.50466800 | 0.12726900  | H | -5.21107900 | 2.48319100  | -0.73432200 |
| C              | -4.82618800 | 0.45052300  | -0.12217000 | H | -2.81286900 | 3.03097000  | -1.00733900 |
| C              | -4.45687300 | 1.72942800  | -0.53220600 | H | 1.82389400  | -1.63036500 | -2.58759900 |
| C              | -3.10584500 | 2.03671900  | -0.68162100 | H | 3.99596200  | -2.43743600 | -1.71530000 |
| S              | 0.16548500  | 0.54530700  | -1.95262300 | H | 5.07894500  | -1.26075800 | 0.19708400  |
| C              | 1.70518600  | 0.02905800  | -1.22237700 | H | 3.96020000  | 0.73214200  | 1.20104800  |
| C              | 2.31008600  | 0.69888500  | -0.14380900 | H | 1.18101700  | 3.97255200  | 0.07120400  |
| C              | 1.62485000  | 1.89603500  | 0.51651100  | H | 2.83063200  | 3.45019300  | -0.31083300 |
| C              | 2.31635100  | -1.10216600 | -1.77730900 | H | 1.50162700  | 2.98288900  | -1.38405500 |
| C              | 3.53192400  | -1.55908900 | -1.27720000 | H | 1.85079100  | 1.59088500  | 2.41742600  |
| C              | 4.13650300  | -0.90219900 | -0.20466200 | H | -0.31891900 | 2.30021600  | 1.35805700  |

|                |             |             |             |              |             |             |             |
|----------------|-------------|-------------|-------------|--------------|-------------|-------------|-------------|
| <b>3a-GS-2</b> |             |             |             | H            | 1.75567200  | -2.63828100 | 0.42667600  |
| C              | -2.65573900 | -0.59570400 | -0.15596700 | H            | -0.37178600 | -0.87327500 | 1.67411200  |
| C              | -2.48607900 | 0.86578200  | 0.12672500  | <b>3a-TS</b> |             |             |             |
| C              | -1.31347600 | 1.52931200  | 0.55957100  | C            | -2.59686500 | -0.70784200 | -0.06008000 |
| C              | 0.08042000  | 0.95335300  | 0.66678400  | C            | -2.55059300 | 0.79299400  | 0.08649300  |
| C              | 0.27066600  | -0.54757400 | 0.84590600  | C            | -1.39269000 | 1.59729100  | 0.24223300  |
| C              | -0.17842300 | -1.32301300 | -0.38824100 | C            | 0.03489700  | 1.12810700  | 0.32369000  |
| C              | -1.64581800 | -1.49763600 | -0.57815200 | C            | 0.33108400  | -0.17944600 | 1.04425400  |
| C              | -1.99039800 | -2.77506700 | -1.05098100 | C            | -0.05810200 | -1.36191500 | 0.17287700  |
| C              | -3.30040400 | -3.23089500 | -1.04059400 | C            | -1.49557400 | -1.60998600 | -0.15941900 |
| C              | -4.28678400 | -2.40283600 | -0.50949500 | C            | -1.71863900 | -2.96276400 | -0.48607600 |
| C              | -3.96390600 | -1.11911900 | -0.08537300 | C            | -2.98361500 | -3.49333700 | -0.65975300 |
| C              | -3.62921500 | 1.67438700  | -0.07976000 | C            | -4.07394500 | -2.64986500 | -0.47203300 |
| C              | -3.65990200 | 3.03285200  | 0.19594300  | C            | -3.87158600 | -1.30752600 | -0.18656100 |
| C              | -2.51981700 | 3.65817300  | 0.69458500  | C            | -3.77499500 | 1.50245400  | 0.01283800  |
| C              | -1.36798400 | 2.90279100  | 0.85338200  | C            | -3.87617000 | 2.88255200  | 0.09246800  |
| S              | 0.98645800  | 1.52565200  | -0.84479200 | C            | -2.72794600 | 3.65322100  | 0.24354600  |
| C              | 2.55734300  | 0.71419800  | -0.61859800 | C            | -1.51097600 | 2.99611900  | 0.31162500  |
| C              | 2.77806000  | -0.34552200 | 0.27563800  | S            | 0.76561800  | 1.07817400  | -1.37327700 |
| C              | 1.73032200  | -0.90036800 | 1.24730100  | C            | 2.41830700  | 0.54634900  | -0.95198200 |
| C              | 3.59795800  | 1.16845700  | -1.44295700 | C            | 2.77535000  | -0.03635000 | 0.27734600  |
| C              | 4.85346500  | 0.57584300  | -1.39231700 | C            | 1.82441400  | -0.24345800 | 1.46760600  |
| C              | 5.08523200  | -0.47902700 | -0.50809500 | C            | 3.37940600  | 0.70445000  | -1.96180800 |
| C              | 4.05429900  | -0.92406900 | 0.31164700  | C            | 4.68968600  | 0.28553000  | -1.76772100 |
| O              | 0.62298000  | -1.93546800 | -1.08307700 | C            | 5.05663900  | -0.29491700 | -0.55263900 |
| C              | 2.02733800  | -0.40217900 | 2.66884800  | C            | 4.10434100  | -0.44754300 | 0.44854200  |
| O              | 1.84584200  | -2.32005300 | 1.33977000  | O            | 0.79216700  | -2.18352500 | -0.15826400 |
| H              | 0.56004900  | 1.44706600  | 1.51317700  | C            | 2.12338300  | 0.79168900  | 2.56236500  |
| H              | -1.18127500 | -3.41059800 | -1.39151900 | O            | 2.08100500  | -1.49523600 | 2.09805400  |
| H              | -3.54001700 | -4.22629700 | -1.39960800 | H            | 0.57911600  | 1.91382300  | 0.84483700  |
| H              | -5.31143300 | -2.75077200 | -0.42252800 | H            | -0.84107100 | -3.59073100 | -0.57213800 |
| H              | -4.75471600 | -0.50816200 | 0.32948600  | H            | -3.11579600 | -4.54180000 | -0.90503800 |
| H              | -4.51561300 | 1.22688200  | -0.50845400 | H            | -5.08901900 | -3.02689300 | -0.55049900 |
| H              | -4.56790300 | 3.59796900  | 0.01140300  | H            | -4.76373100 | -0.71673800 | -0.05624500 |
| H              | -2.51883700 | 4.71717400  | 0.93079200  | H            | -4.70205100 | 0.97372700  | -0.13852200 |
| H              | -0.45783900 | 3.38532800  | 1.19716200  | H            | -4.85417000 | 3.34847100  | 0.02633300  |
| H              | 3.41155100  | 1.99122400  | -2.12691600 | H            | -2.77713100 | 4.73535400  | 0.30352300  |
| H              | 5.64646800  | 0.93822500  | -2.03916300 | H            | -0.59948000 | 3.57645700  | 0.41867200  |
| H              | 6.06088600  | -0.95201000 | -0.45921900 | H            | 3.08766900  | 1.16018500  | -2.90341400 |
| H              | 4.21406800  | -1.75643700 | 0.98836700  | H            | 5.41950800  | 0.41430400  | -2.56103500 |
| H              | 1.28537900  | -0.79876000 | 3.36862800  | H            | 6.07622500  | -0.62863400 | -0.38784700 |
| H              | 3.01284200  | -0.76334600 | 2.96925700  | H            | 4.36926000  | -0.92053800 | 1.38789100  |
| H              | 2.03711300  | 0.68769600  | 2.73194800  |              |             |             |             |

|   |            |            |            |
|---|------------|------------|------------|
| H | 1.43423100 | 0.65789600 | 3.40174200 |
| H | 3.14083100 | 0.63080000 | 2.92401800 |
| H | 2.05693600 | 1.81943800 | 2.20083400 |

|   |             |             |            |
|---|-------------|-------------|------------|
| H | 1.94986100  | -2.15345100 | 1.39485800 |
| H | -0.27492500 | -0.22380100 | 1.95906000 |

## 6. X-ray Crystal Structure of Enantiopure

The molecular structure and X-ray diffractive data/refinement of 3a were shown below.

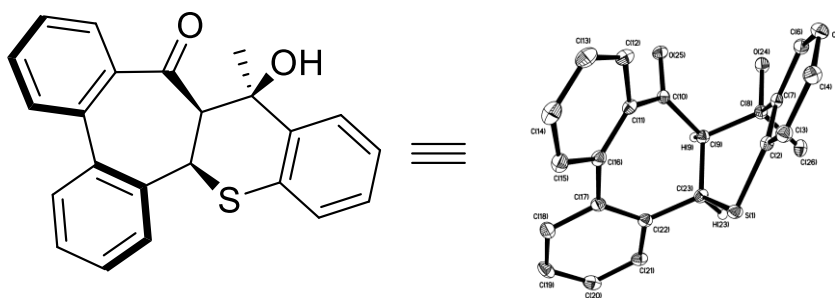

## Datablock: fanwx\_98\_200922

---

Bond precision: C-C = 0.0040 Å                      Wavelength=1.54184  
Cell:                      a=10.3685(1)      b=10.7520(1)      c=15.8732(1)  
                              alpha=90            beta=99.443(1)      gamma=90  
Temperature:            100 K

|                        | Calculated   | Reported     |
|------------------------|--------------|--------------|
| Volume                 | 1745.60(3)   | 1745.60(3)   |
| Space group            | P 21         | P 1 21 1     |
| Hall group             | P 2yb        | P 2yb        |
| Moiety formula         | C23 H18 O2 S | C23 H18 O2 S |
| Sum formula            | C23 H18 O2 S | C23 H18 O2 S |
| Mr                     | 358.43       | 358.43       |
| Dx, g cm <sup>-3</sup> | 1.364        | 1.364        |
| Z                      | 4            | 4            |
| Mu (mm <sup>-1</sup> ) | 1.755        | 1.755        |
| F000                   | 752.0        | 752.0        |
| F000'                  | 755.32       |              |
| h,k,lmax               | 13,13,20     | 13,13,20     |
| Nref                   | 7374[ 3891]  | 7207         |
| Tmin,Tmax              | 0.620,0.645  | 0.729,1.000  |
| Tmin'                  | 0.563        |              |

Correction method= # Reported T Limits: Tmin=0.729 Tmax=1.000  
AbsCorr = MULTI-SCAN

Data completeness= 1.85/0.98                      Theta(max)= 77.042

R(reflections)= 0.0373( 7061)                      wR2(reflections)= 0.1008( 7207)

S = 1.126                                              Npar= 474

---

The following ALERTS were generated. Each ALERT has the format  
**test-name\_ALERT\_alert-type\_alert-level**.  
Click on the hyperlinks for more details of the test.



---

| ● Alert level C   |                                                                 |              |
|-------------------|-----------------------------------------------------------------|--------------|
| PLAT340_ALERT_3_C | Low Bond Precision on C-C Bonds .....                           | 0.00404 Ang. |
| PLAT790_ALERT_4_C | Centre of Gravity not Within Unit Cell: Resd. #<br>C23 H18 O2 S | 1 Note       |
| PLAT934_ALERT_3_C | Number of (Iobs-Icalc)/Sigma(W) > 10 Outliers ..                | 1 Check      |

---

| ● Alert level G   |                                                  |              |
|-------------------|--------------------------------------------------|--------------|
| PLAT007_ALERT_5_G | Number of Unrefined Donor-H Atoms .....          | 2 Report     |
| PLAT142_ALERT_4_G | s.u. on b - Axis Small or Missing .....          | 0.00010 Ang. |
| PLAT143_ALERT_4_G | s.u. on c - Axis Small or Missing .....          | 0.00010 Ang. |
| PLAT153_ALERT_1_G | The s.u.'s on the Cell Axes are Equal ..(Note)   | 0.0001 Ang.  |
| PLAT791_ALERT_4_G | Model has Chirality at C8 (Sohnke SpGr)          | R Verify     |
| PLAT791_ALERT_4_G | Model has Chirality at C9 (Sohnke SpGr)          | R Verify     |
| PLAT791_ALERT_4_G | Model has Chirality at C23 (Sohnke SpGr)         | R Verify     |
| PLAT791_ALERT_4_G | Model has Chirality at C34 (Sohnke SpGr)         | R Verify     |
| PLAT791_ALERT_4_G | Model has Chirality at C35 (Sohnke SpGr)         | R Verify     |
| PLAT791_ALERT_4_G | Model has Chirality at C49 (Sohnke SpGr)         | R Verify     |
| PLAT912_ALERT_4_G | Missing # of PCF Reflections Above STh/L= 0.600  | 44 Note      |
| PLAT933_ALERT_2_G | Number of OMIT Records in Embedded .res File ... | 2 Note       |
| PLAT978_ALERT_2_G | Number C-C Bonds with Positive Residual Density. | 8 Info       |

---

0 ALERT level A - Most likely a serious problem - resolve or explain  
0 ALERT level B - A potentially serious problem, consider carefully  
3 ALERT level C - Check. Ensure it is not caused by an omission or oversight  
13 ALERT level G - General information/check it is not something unexpected

1 ALERT type 1 CIF construction/syntax error, inconsistent or missing data  
2 ALERT type 2 Indicator that the structure model may be wrong or deficient  
2 ALERT type 3 Indicator that the structure quality may be low  
10 ALERT type 4 Improvement, methodology, query or suggestion  
1 ALERT type 5 Informative message, check

---

## 7. Characterization Data for the Products

(9*aR*,10*R*,15*aR*)-10-hydroxy-10-methyl-9*a*,15*a*-dihydrodibenzo [4,5:6,7] cyclohepta[1,2-*b*] thiochromen-9(10*H*)-one (**3a**)

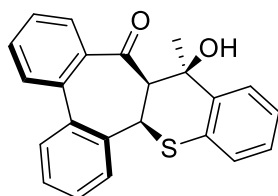

**3a**

Flash column chromatography on silica gel (hexane/EtOAc, 30:1) gave the product **3a** (31.5 mg, 88% yield) as a white solid.  $[\alpha]_D^{25} = -25$  ( $c = 1.0$  in DCM, 99% ee, >20:1 dr).  $^1\text{H NMR}$  (500 MHz,  $\text{CDCl}_3$ )  $\delta$  7.68 (d,  $J = 7.7$  Hz, 1H), 7.45 (dt,  $J = 19.3, 7.2$  Hz, 3H), 7.37 (q,  $J = 7.7$  Hz, 3H), 7.07 (t,  $J = 7.5$  Hz, 1H), 6.97 (t,  $J = 7.5$  Hz, 1H), 6.90 (t,

$J = 7.3$  Hz, 1H), 6.54 (d,  $J = 7.8$  Hz, 1H), 6.43 (d,  $J = 7.7$  Hz, 1H), 5.03 (d,  $J = 5.0$  Hz, 1H), 4.73 (s, 1H), 3.45 (d,  $J = 5.0$  Hz, 1H), 1.70 (s, 3H).  $^{13}\text{C}$  NMR (126 MHz,  $\text{CDCl}_3$ )  $\delta$  209.20, 139.92, 139.26, 139.19, 138.85, 136.22, 134.93, 132.53, 131.46, 129.81, 129.73, 128.72, 128.15, 128.11, 127.62, 127.24, 125.25, 124.96, 124.90, 75.12, 64.52, 44.63, 27.09. HRMS (ESI)  $m/z$  calcd for  $\text{C}_{23}\text{H}_{19}\text{NO}_3\text{S}^+$  (M+H) $^+$  :359.1100, found 359.1108. The ee of compound **3a** was determined by HPLC using a MX (2) column (0.46 cm x 25 cm),  $n$ -hexane/ $i$ -PrOH = 94/6, flow rate = 1.0 mL/min,  $\lambda = 254$  nm,  $t(\text{minor}) = 8.525$  min,  $t(\text{major}) = 9.133$  min.

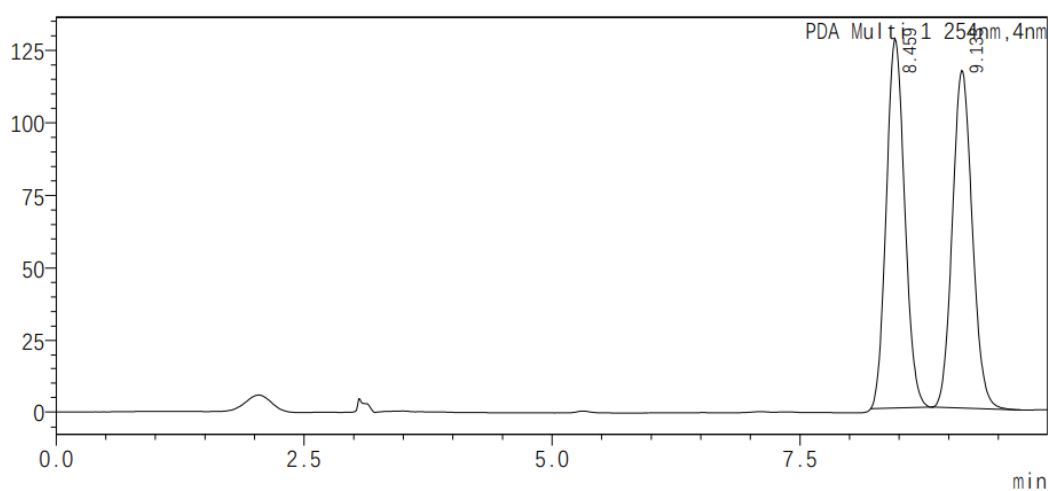

PDA Ch1 254nm

| NO. | Ret. Time | Area(uAU*min) | Height(uAU) | Rel. Area % | Resolution(USP) |
|-----|-----------|---------------|-------------|-------------|-----------------|
| 1   | 8.459     | 1653675       | 127702      | 50.269      | 0.355           |
| 2   | 9.133     | 1635958       | 116692      | 49.731      | 0.379           |

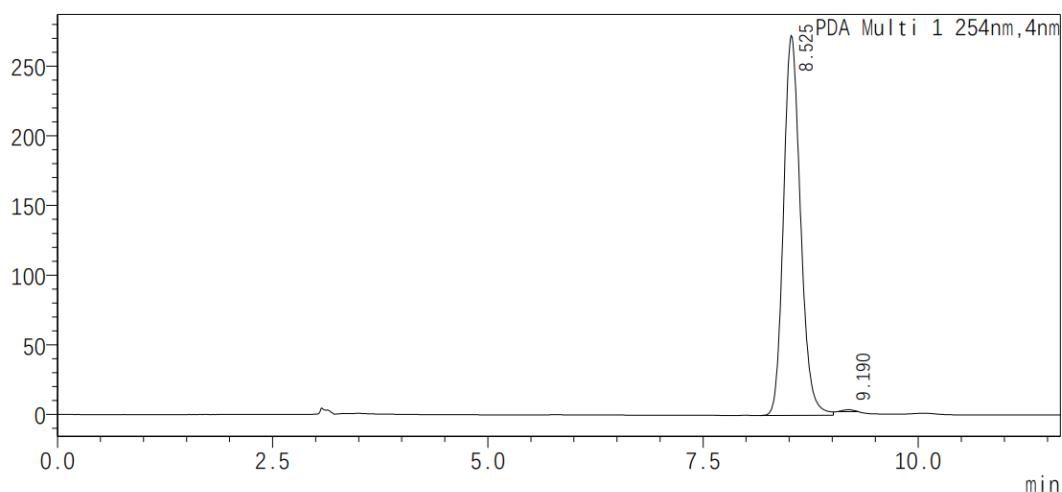

PDA Ch1 254nm

| NO. | Ret. Time | Area(uAU*min) | Height(uAU) | Rel. Area % | Resolution(USP) |
|-----|-----------|---------------|-------------|-------------|-----------------|
| 1   | 8.525     | 3738820       | 272507      | 99.691      | 0.366           |
| 2   | 9.190     | 11599         | 1371        | 0.309       | 0.232           |

**(9a*R*,10*R*,15a*R*)-6-fluoro-10-hydroxy-10-methyl-9a,15a-dihydrodibenzo [4,5:6,7] cyclohepta[1,2-*b*] thiochromen-9(10*H*)-one (3b)**

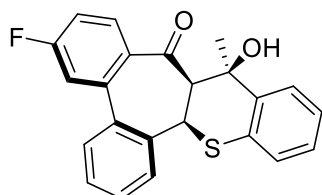

**3b**

Flash column chromatography on silica gel (hexane/EtOAc, 16:1) gave the product **3b** (33.1 mg, 88% yield) as a white solid.  $[\alpha]_D^{25} = -22$  ( $c = 1.0$  in DCM, 95% ee, >20:1 dr).  $^1\text{H NMR}$  (500 MHz,  $\text{CDCl}_3$ )  $\delta$  7.68 (d,  $J = 7.8$  Hz, 1H), 7.55 – 7.45 (m, 1H), 7.41 (m, 3H), 7.07 (q,  $J = 8.4, 8.0$  Hz, 2H), 6.94 (t,  $J = 7.5$  Hz, 1H), 6.67 (t,  $J = 8.0$  Hz, 1H), 6.62 (d,  $J = 7.8$  Hz, 1H), 6.49 – 6.42 (m, 1H), 5.03 (d,  $J = 4.9$  Hz, 1H), 4.75 (s, 1H), 3.43 (d,  $J = 4.9$  Hz, 1H), 1.71 (s, 3H).  $^{13}\text{C NMR}$  (126 MHz,  $\text{CDCl}_3$ )  $\delta$  207.80, 165.31 (d,  $J = 254.52$  Hz), 141.78, 141.71, 139.95, 138.18, 136.44, 135.61, 134.88, 131.36, 130.47 (d,  $J = 8.82$  Hz), 129.93, 129.87, 129.31, 127.36, 125.22, 125.02, 114.87 (d,  $J = 6.30$  Hz), 114.69 (d,  $J = 5.04$  Hz), 75.21, 64.21, 44.55, 27.06.  $^{19}\text{F NMR}$  (377 MHz,  $\text{CDCl}_3$ )  $\delta$  -93.47. HRMS (ESI)  $m/z$  calcd for  $\text{C}_{23}\text{H}_{18}\text{FO}_2\text{S}^+$  ( $\text{M}+\text{H}$ ) $^+$  377.1000, found 377.1006. The ee of compound **3b** was determined by HPLC using a MX (2) column (0.46 cm x 25 cm), *n*-hexane/*i*-PrOH = 94/6, flow rate = 1.0 mL/min,  $\lambda = 254$  nm,  $t(\text{minor}) = 7.216$  min,  $t(\text{major}) = 7.993$  min.

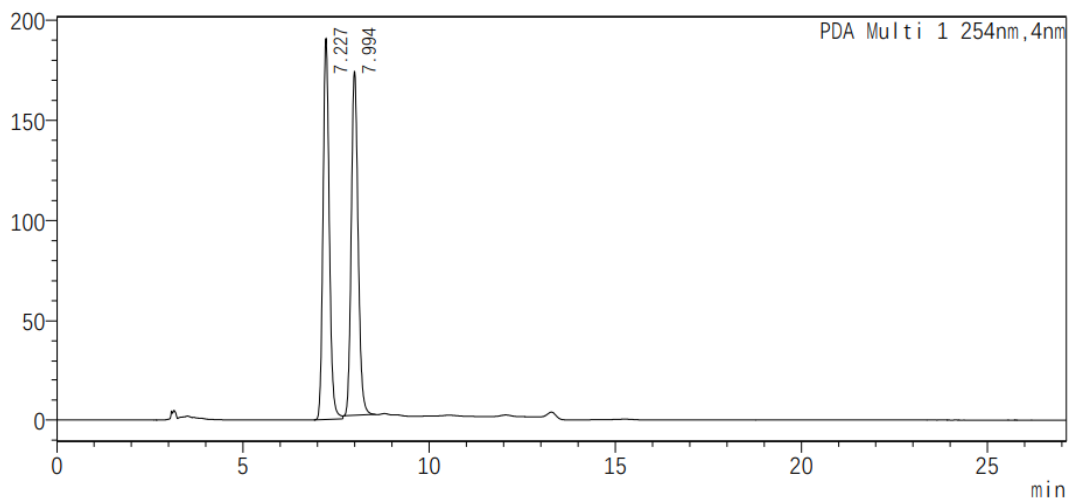

PDA Ch1 254nm

| NO. | Ret. Time | Area(uAU*min) | Height(uAU) | Rel. Area % | Resolution(USP) |
|-----|-----------|---------------|-------------|-------------|-----------------|
| 1   | 7.227     | 2240280       | 190534      | 50.340      | 0.316           |
| 2   | 7.994     | 2209998       | 172025      | 49.660      | 0.345           |

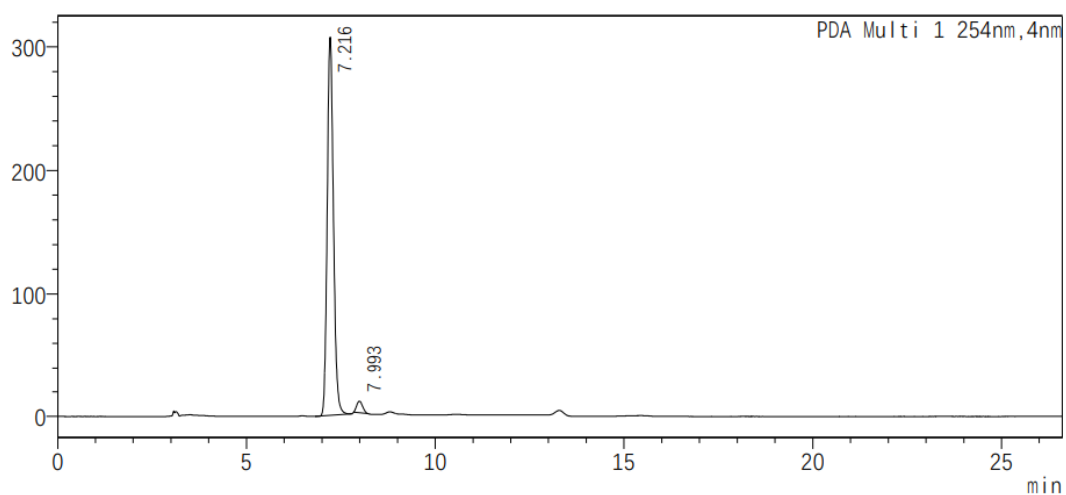

PDA Ch1 254nm

| NO. | Ret. Time | Area(uAU*min) | Height(uAU) | Rel. Area % | Resolution(USP) |
|-----|-----------|---------------|-------------|-------------|-----------------|
| 1   | 7.216     | 3533495       | 306604      | 97.175      | 0.312           |
| 2   | 7.993     | 102716        | 9401        | 2.825       | 0.309           |

**(9aR,10R,15aR)-2-chloro-10-hydroxy-10-methyl-9a,15a-dihydrodibenzo [4,5:6,7] cyclohepta[1,2-b] thiochromen-9(10H)-one**

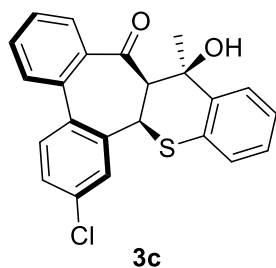

Flash column chromatography on silica gel (hexane/EtOAc, 16:1) gave the product **3b** (32.6 mg, 83% yield) as a white solid.  $[\alpha]_D^{25} = -26$  ( $c = 1.0$  in DCM, 97% ee, >20:1 dr).  $^1\text{H}$  NMR (500 MHz,  $\text{CDCl}_3$ )  $\delta$  7.68 (d,  $J = 7.8$  Hz, 1H), 7.56 – 7.39 (m, 3H), 7.37 (d,  $J = 8.0$  Hz, 1H), 7.31 (d,  $J = 7.7$  Hz, 1H), 7.08 (t,  $J = 7.4$  Hz, 1H), 6.99 (t,  $J = 7.6$  Hz, 1H), 6.91 (t,  $J = 7.6$  Hz, 1H), 6.53 (d,  $J = 7.8$  Hz, 1H), 6.43 (d,  $J = 7.7$  Hz, 1H), 4.97 (d,  $J = 4.9$  Hz, 1H), 4.67 (s, 1H), 3.45 (d,  $J = 4.9$  Hz, 1H), 1.70 (s, 3H).  $^{13}\text{C}$  NMR (126 MHz,  $\text{CDCl}_3$ )  $\delta$  208.60, 139.87, 139.11, 137.99, 137.77, 137.71, 134.54, 134.35, 132.73, 132.61, 129.70, 128.29, 127.96, 127.33, 125.27, 125.11, 125.01, 75.11, 64.33, 44.27, 26.97. HRMS (ESI)  $m/z$  calcd for  $\text{C}_{23}\text{H}_{18}\text{ClO}_2\text{S}^+$  ( $\text{M}+\text{H}$ ) $^+$  393.0711, found 393.0721. The ee of compound **3c** was determined by HPLC using a MX (2) column (0.46 cm x 25 cm),  $n$ -hexane/ $i$ -PrOH = 94/6, flow rate = 1.0 mL/min,  $\lambda = 254$  nm,  $t(\text{major}) = 8.202$  min,  $t(\text{minor}) = 9.185$  min.

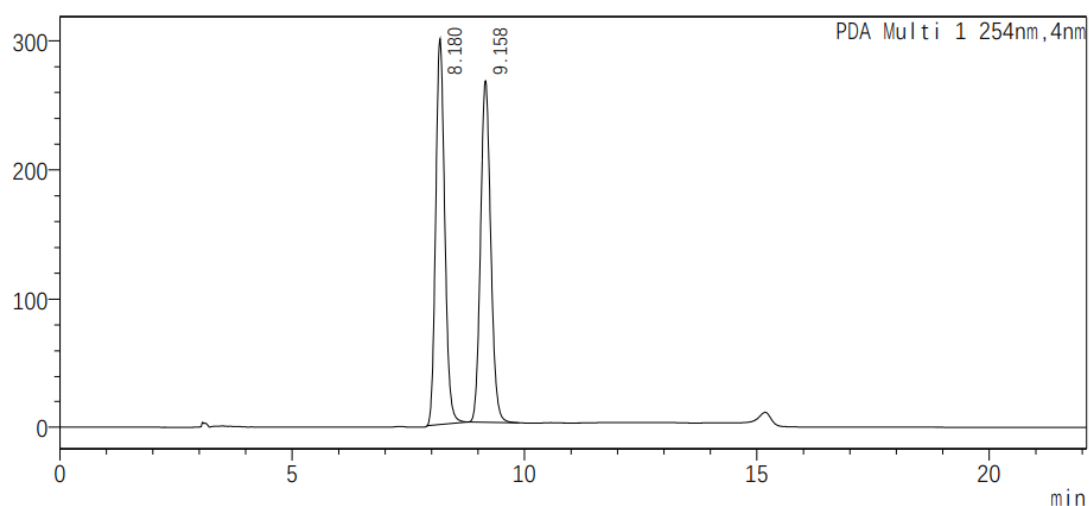

PDA Ch1 254nm

| NO. | Ret. Time | Area(uAU*min) | Height(uAU) | Rel. Area % | Resolution(USP) |
|-----|-----------|---------------|-------------|-------------|-----------------|
| 1   | 8.180     | 4054754       | 299450      | 50.012      | 0.364           |
| 2   | 9.158     | 4052733       | 265310      | 49.988      | 0.409           |

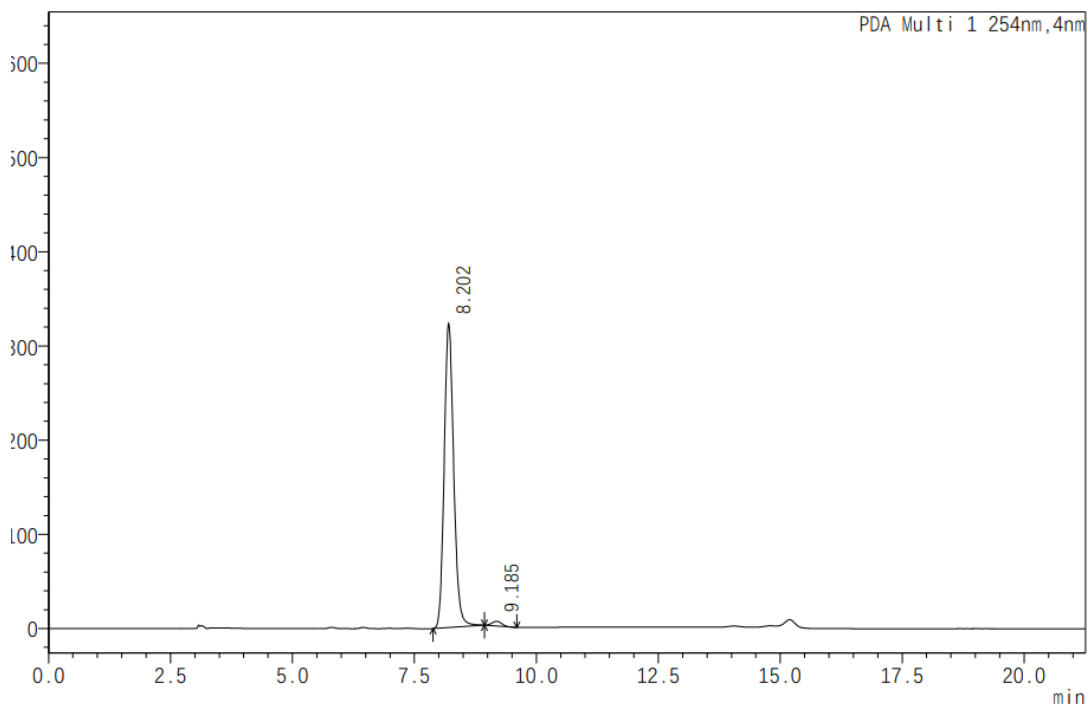

PDA Ch1 254nm

| NO. | Ret. Time | Area(uAU*min) | Height(uAU) | Rel. Area % | Resolution(USP) |
|-----|-----------|---------------|-------------|-------------|-----------------|
| 1   | 8.202     | 4368840       | 322528      | 98.526      | 0.362           |
| 2   | 9.185     | 65347         | 4886        | 1.474       | 0.382           |

**(9*aR*,10*R*,15*aR*)-2-chloro-6-fluoro-10-hydroxy-10-methyl-9*a*,15*a*-dihydrodibenz -  
o [4,5:6,7] cyclohepta[1,2-*b*] thiochromen-9(10*H*)-one (3d)**

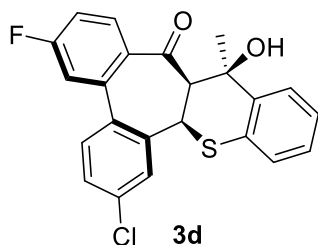

Flash column chromatography on silica gel (hexane/EtOAc, 16:1) gave the product **3d** (37.4 mg, 85% yield) as a white solid.  $[\alpha]_D^{25} = -22$  ( $c = 1.0$  in DCM, 91% ee, >20:1 dr).  $^1\text{H NMR}$  (500 MHz,  $\text{CDCl}_3$ )  $\delta$  7.68 (d,  $J = 7.7$  Hz, 1H), 7.55 – 7.39 (m, 2H), 7.34 (d,  $J = 8.2$  Hz, 1H), 7.09 (t,  $J = 7.5$  Hz, 1H), 7.06 – 6.99 (m, 1H), 6.94 (t,  $J = 7.4$  Hz, 1H), 6.68 (t,  $J = 8.2$  Hz, 1H), 6.60 (d,  $J = 7.8$  Hz, 1H), 6.52 – 6.39 (m, 1H), 4.97 (d,  $J = 5.0$  Hz, 1H), 4.69 (s, 1H), 3.43 (d,  $J = 4.9$  Hz, 1H), 1.70 (s, 3H).  $^{13}\text{C NMR}$  (126 MHz,  $\text{CDCl}_3$ )  $\delta$  207.21, 165.29 (d,  $J = 254.52$  Hz), 140.59, 140.52, 139.89, 138.21, 136.65, 135.54, 135.01, 134.48, 132.63, 131.14 (d,  $J = 8.82$  Hz), 129.85, 129.84, 127.45, 125.23,

125.06, 115.10 (d,  $J = 21.42$  Hz), 114.69 (d,  $J = 254.52$  Hz), 75.20, 64.01, 44.18, 26.94.  $^{19}\text{F}$  NMR (471 MHz,  $\text{CDCl}_3$ )  $\delta$  -106.12. HRMS (ESI)  $m/z$  calcd for  $\text{C}_{23}\text{H}_{17}\text{ClFO}_2\text{S}^+$  ( $\text{M}+\text{H}$ ) $^+$  411.0616, found 411.0628. The ee of compound **3d** was determined by HPLC using a MX (2) column (0.46 cm x 25 cm),  $n$ -hexane/ $i$ -PrOH = 94/6, flow rate = 1.0 mL/min,  $\lambda = 254$  nm,  $t(\text{minor}) = 7.230$  min,  $t(\text{major}) = 8.007$  min.

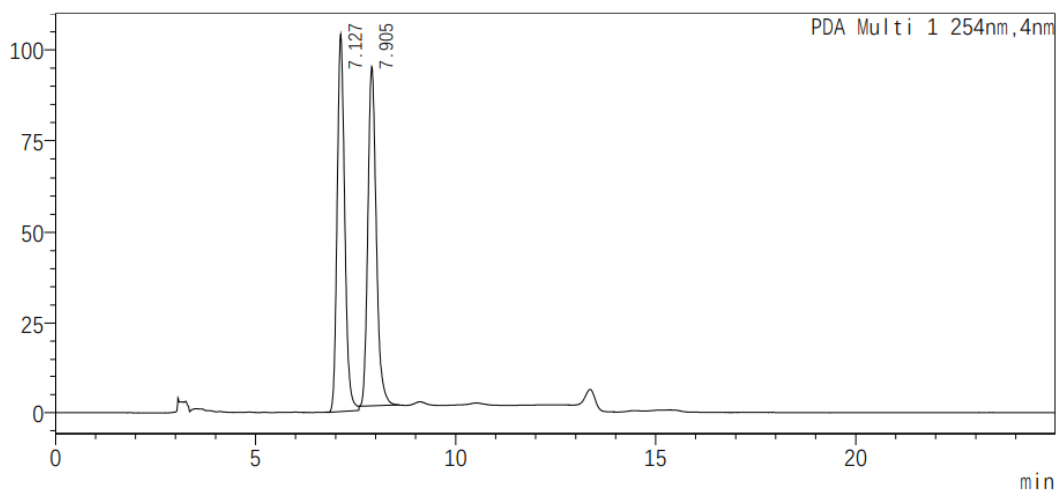

PDA Ch1 254nm

| NO. | Ret. Time | Area(uAU*min) | Height(uAU) | Rel. Area % | Resolution(USP) |
|-----|-----------|---------------|-------------|-------------|-----------------|
| 1   | 7.127     | 1373163       | 103967      | 50.035      | 0.353           |
| 2   | 7.905     | 1371220       | 93526       | 49.965      | 0.386           |

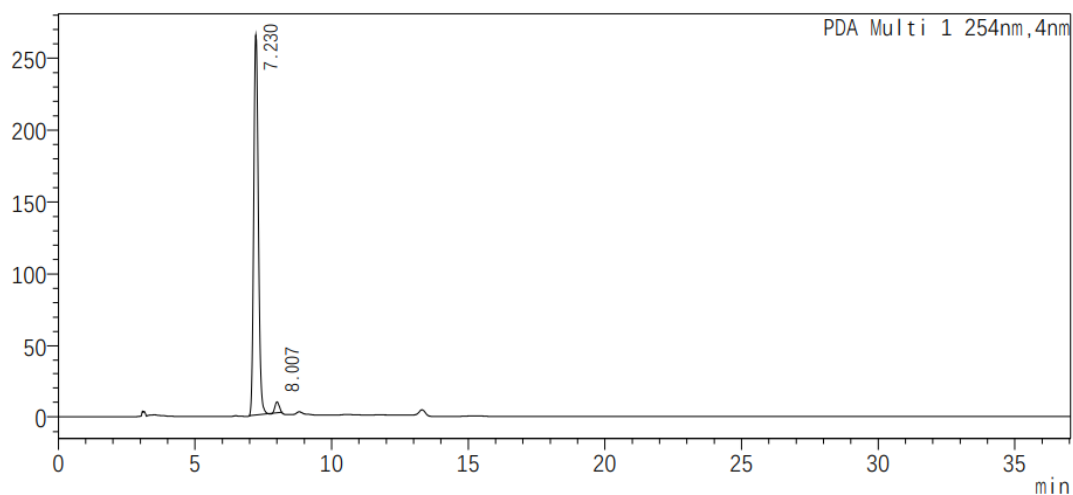

PDA Ch1 254nm

| NO. | Ret. Time | Area(uAU*min) | Height(uAU) | Rel. Area % | Resolution(USP) |
|-----|-----------|---------------|-------------|-------------|-----------------|
| 1   | 7.230     | 3065915       | 264874      | 97.474      | 0.314           |
| 2   | 8.007     | 79445         | 7617        | 2.526       | 0.303           |

**(9aR,10R,15aR)-6-chloro-10-hydroxy-10-methyl-9a,15a-dihydrodibenzo [4,5:6,7] cyclohepta[1,2-*b*] thiochromen-9(10*H*)-one (3e)**

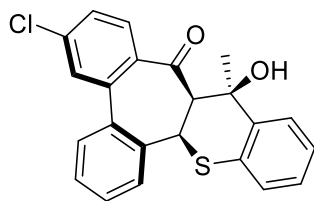

**3e**

Flash column chromatography on silica gel (hexane/EtOAc, 16:1) gave the product **3e** (36.1 mg, 92% yield) as a white solid.  $[\alpha]_D^{25} = -28$  ( $c = 1.0$  in DCM, 98% ee, >20:1 dr).  $^1\text{H NMR}$  (500 MHz,  $\text{CDCl}_3$ )  $\delta$  7.69 (d,  $J = 7.7$  Hz, 1H), 7.57 – 7.29 (m, 5H), 7.08 (t,  $J = 7.0$  Hz, 1H), 7.02 – 6.80 (m, 1H), 6.62 (d,  $J = 7.7$  Hz, 1H), 6.39 (d,  $J = 7.8$  Hz, 1H), 5.46 – 4.85 (m, 1H), 4.67 (s, 1H), 3.57 – 3.07 (m, 1H), 1.71 (s, 3H).  $^{13}\text{C NMR}$  (126 MHz,  $\text{CDCl}_3$ )  $\delta$  208.01, 140.48, 139.96, 138.73, 137.95, 137.57, 136.47, 134.81, 131.35, 129.95, 129.87, 129.67, 129.32, 127.97, 127.67, 127.42, 125.29, 125.04, 125.00, 75.20, 64.36, 44.49, 27.09. HRMS (ESI)  $m/z$  calcd for  $\text{C}_{23}\text{H}_{18}\text{ClO}_2\text{S}^+$  ( $\text{M}+\text{H}$ ) $^+$  393.0711, found 393.0724. The ee of compound **3e** was determined by HPLC using a MX (2) column (0.46 cm x 25 cm), *n*-hexane/*i*-PrOH = 94/6, flow rate = 1.0 mL/min,  $\lambda = 254$  nm,  $t(\text{minor}) = 7.129$  min,  $t(\text{major}) = 7.913$  min.

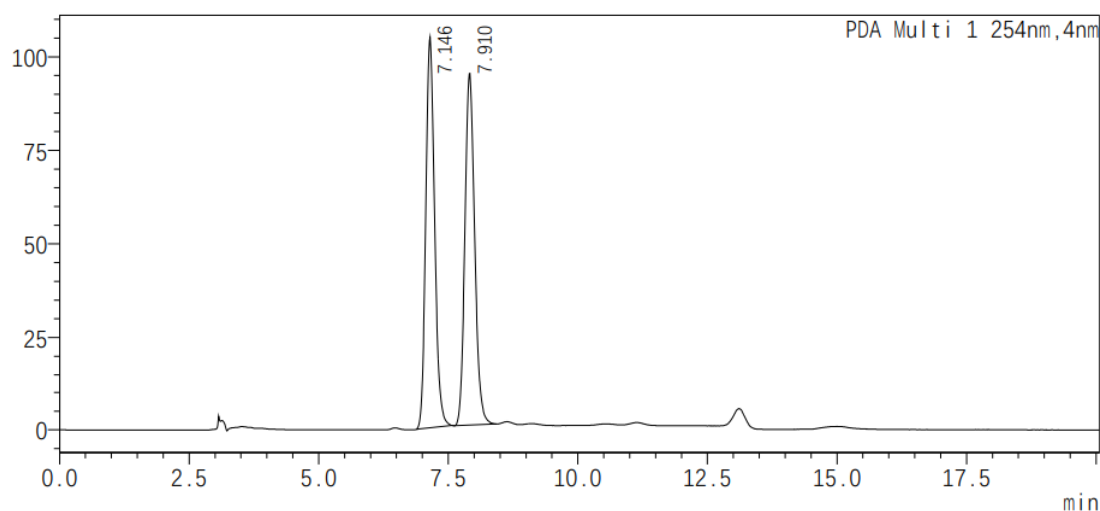

PDA Ch1 254nm

| NO. | Ret. Time | Area(uAU*min) | Height(uAU) | Rel. Area % | Resolution(USP) |
|-----|-----------|---------------|-------------|-------------|-----------------|
| 1   | 7.146     | 1245112       | 104630      | 50.140      | 0.323           |
| 2   | 7.910     | 1238158       | 94272       | 49.860      | 0.353           |



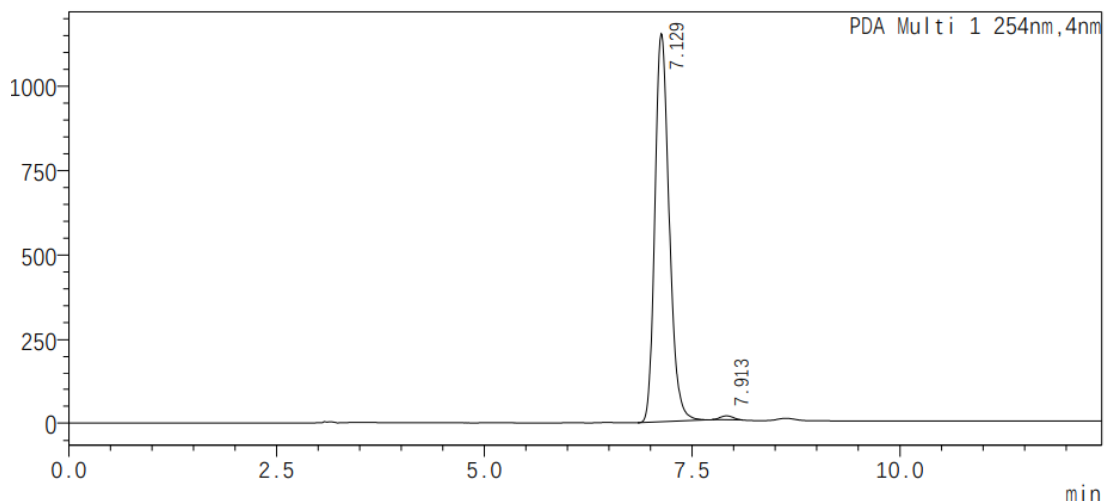

PDA Ch1 254nm

| NO. | Ret. Time | Area(uAU*min) | Height(uAU) | Rel. Area % | Resolution(USP) |
|-----|-----------|---------------|-------------|-------------|-----------------|
| 1   | 7.129     | 13811672      | 1152353     | 99.098      | 0.322           |
| 2   | 7.913     | 125726        | 11495       | 0.902       | 0.311           |

**(9a*R*,10*R*,15a*R*)-3,6-difluoro-10-hydroxy-10-methyl-9a,15a-dihydrodibenzo  
[4,5:6,7] cyclohepta[1,2-*b*] thiochromen-9(10*H*)-one (3f)**

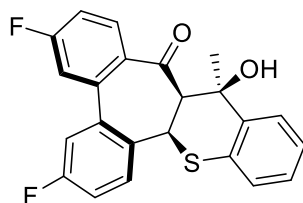

**3f**

Flash column chromatography on silica gel (hexane/EtOAc, 8:1) gave the product **3f** (34.7 mg, 88% yield) as a white solid.  $[\alpha]_D^{25} = -18$  ( $c = 1.0$  in DCM, 99% ee,  $>20:1$  dr).  $^1\text{H NMR}$  (500 MHz,  $\text{CDCl}_3$ )  $\delta$  7.68 (d,  $J = 7.7$  Hz, 1H), 7.49 – 7.32 (m, 1H), 7.08 (ddt,  $J = 17.7, 15.0, 9.4$  Hz, 4H), 6.94 (t,  $J = 7.5$  Hz, 1H), 6.69 (t,  $J = 7.4$  Hz, 1H), 6.60 (d,  $J = 7.8$  Hz, 1H), 6.54 – 6.42 (m, 1H), 5.03 (d,  $J = 4.9$  Hz, 1H), 4.68 (s, 1H), 3.41 (d,  $J = 4.9$  Hz, 1H), 1.70 (s, 3H).  $^{13}\text{C NMR}$  (126 MHz,  $\text{CDCl}_3$ )  $\delta$  207.17, 165.13 (d,  $J = 253.3$  Hz), 163.24 (d,  $J = 249.3$  Hz), 140.28 (d,  $J = 10.1$  Hz), 140.15, 139.72, 135.43 (d,  $J = 2.5$  Hz), 134.56, 132.22 (d,  $J = 3.8$  Hz), 131.61 (d,  $J = 7.6$  Hz), 131.00 (d,  $J = 10.1$  Hz), 127.26, 125.03 (d,  $J = 7.6$  Hz), 124.89, 118.13 (d,  $J = 22.7$  Hz), 115.70 (d,  $J = 21.4$  Hz), 115.18 (d,  $J = 21.4$  Hz), 114.60 (d,  $J = 23.9$  Hz), 75.07, 64.10, 43.63, 26.86.  $^{19}\text{F NMR}$  (377 MHz,  $\text{CDCl}_3$ )  $\delta$  -88.22, -93.96. HRMS (ESI)  $m/z$  calcd for  $\text{C}_{23}\text{H}_{17}\text{F}_2\text{O}_2\text{S}^+$

$(M+H)^+$  395.0912, found 395.0899. The ee of compound **3f** was determined by HPLC using a MX(2) column (0.46 cm x 25 cm), *n*-hexane/*i*-PrOH = 94/6, flow rate = 1.0 mL/min,  $\lambda = 254$  nm,  $t(\text{minor}) = 7.514$  min,  $t(\text{major}) = 8.046$  min.

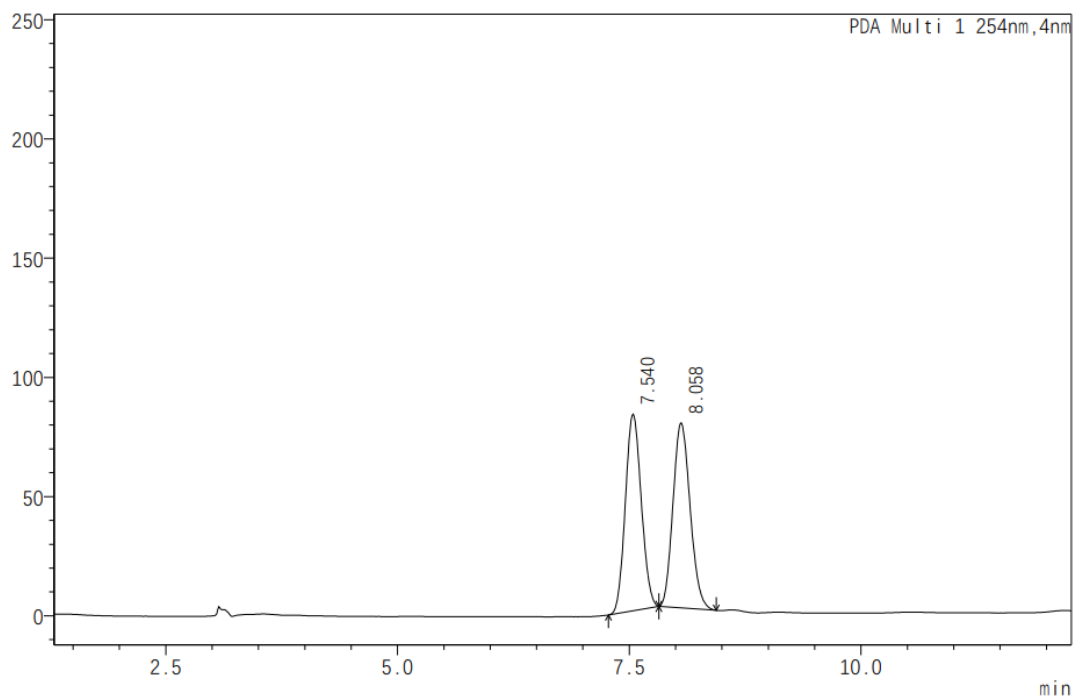

PDA Ch1 254nm

| NO. | Ret.Time | Area(uAU*min) | Height(uAU) | Rel.Area % | Resolution(USP) |
|-----|----------|---------------|-------------|------------|-----------------|
| 1   | 7.540    | 987976        | 82487       | 49.720     | 0.330           |
| 2   | 8.058    | 999121        | 77556       | 50.280     | 0.351           |

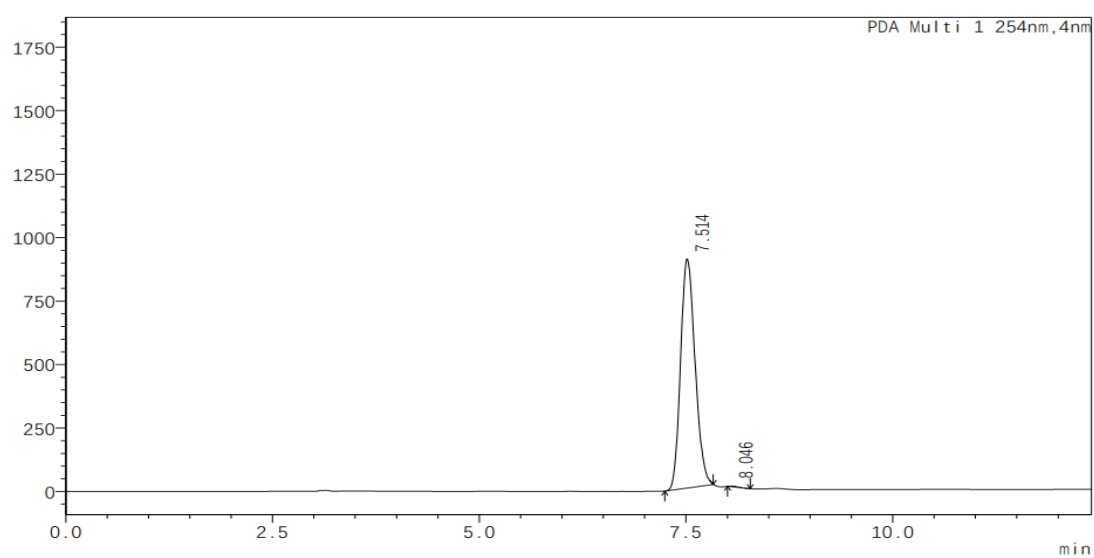

PDA Ch1 254nm

| NO. | Ret.Time | Area(uAU*min) | Height(uAU) | Rel.Area % | Resolution(USP) |
|-----|----------|---------------|-------------|------------|-----------------|
| 1   | 7.514    | 11006844      | 902758      | 99.836     | 0.333           |
| 2   | 8.046    | 18049         | 2775        | 0.164      | 0.191           |

**(9a*R*,10*R*,15a*R*)-7-bromo-10-hydroxy-10-methyl-9a,15a-dihydrodibenzo [4,5: 6, 7] cyclohepta[1,2-*b*] thiochromen-9(10*H*)-one (3g)**

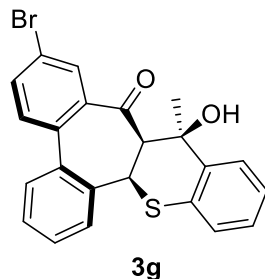

Flash column chromatography on silica gel (hexane/EtOAc, 30:1) gave the product **3g** (39.3 mg, 90% yield) as a white solid.  $[\alpha]_D^{25} = -34$  ( $c = 1.0$  in DCM, 99% ee, >20:1 dr).  $^1\text{H NMR}$  (500 MHz,  $\text{CDCl}_3$ )  $\delta$  7.68 (d,  $J = 7.7$  Hz, 1H), 7.64 – 7.55 (m, 2H), 7.48 (t,  $J = 7.5$  Hz, 1H), 7.30 (t,  $J = 7.2$  Hz, 2H), 7.08 (t,  $J = 7.5$  Hz, 1H), 6.99 (t,  $J = 7.5$  Hz, 1H), 6.91 (t,  $J = 7.5$  Hz, 1H), 6.53 (d,  $J = 7.8$  Hz, 1H), 6.43 (d,  $J = 7.6$  Hz, 1H), 4.96 (d,  $J = 5.0$  Hz, 1H), 4.68 (s, 1H), 3.45 (d,  $J = 5.0$  Hz, 1H), 1.70 (s, 3H).  $^{13}\text{C NMR}$  (101 MHz,  $\text{CDCl}_3$ )  $\delta$  208.53, 139.86, 139.05, 138.23, 137.71, 134.52, 132.93, 132.67, 132.61, 132.53, 128.29, 127.98, 127.90, 127.31, 125.25, 125.10, 125.00, 122.38, 75.10, 64.35, 44.16, 26.95. HRMS (ESI)  $m/z$  calcd for  $\text{C}_{23}\text{H}_{18}\text{BrO}_2\text{S}^+$  ( $\text{M}+\text{H}$ ) $^+$  437.0205, found 437.0210. The ee of compound **3g** was determined by HPLC using a MX (2) column (0.46 cm x 25 cm), *n*-hexane/*i*-PrOH = 94/6, flow rate = 1.0 mL/min,  $\lambda = 254$  nm,  $t(\text{minor}) = 8.608$  min,  $t(\text{major}) = 9.847$  min.

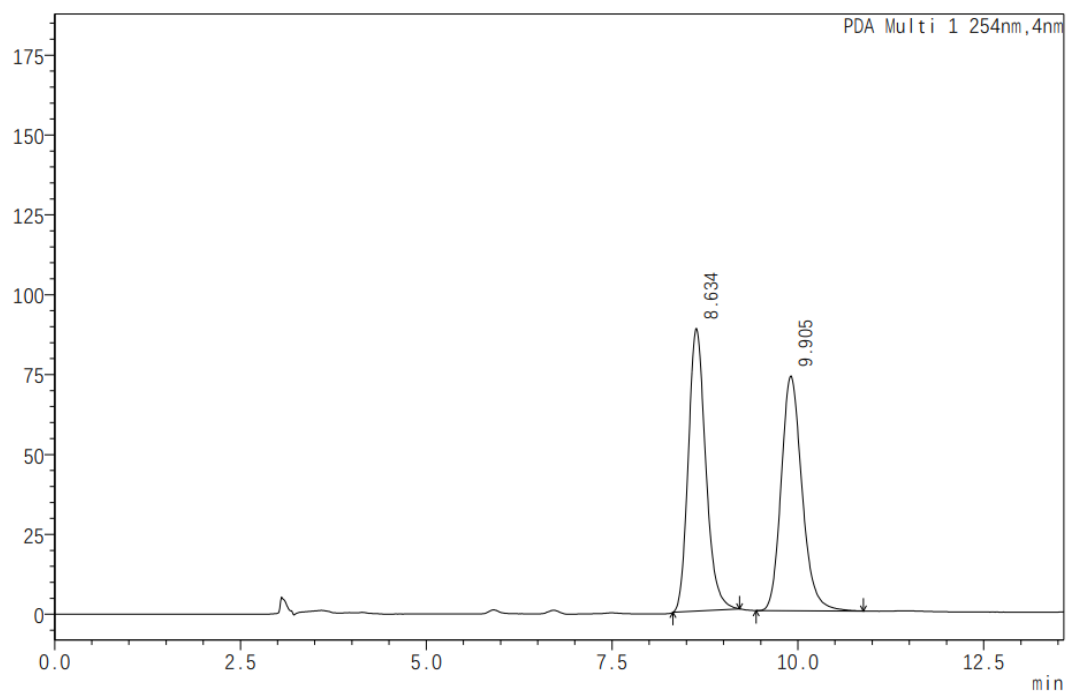

PDA Ch1 254nm

| NO. | Ret. Time | Area(uAU*min) | Height(uAU) | Rel. Area % | Resolution(USP) |
|-----|-----------|---------------|-------------|-------------|-----------------|
| 1   | 8.634     | 1443226       | 88465       | 50.160      | 0.431           |
| 2   | 9.905     | 1434040       | 73485       | 49.840      | 0.510           |

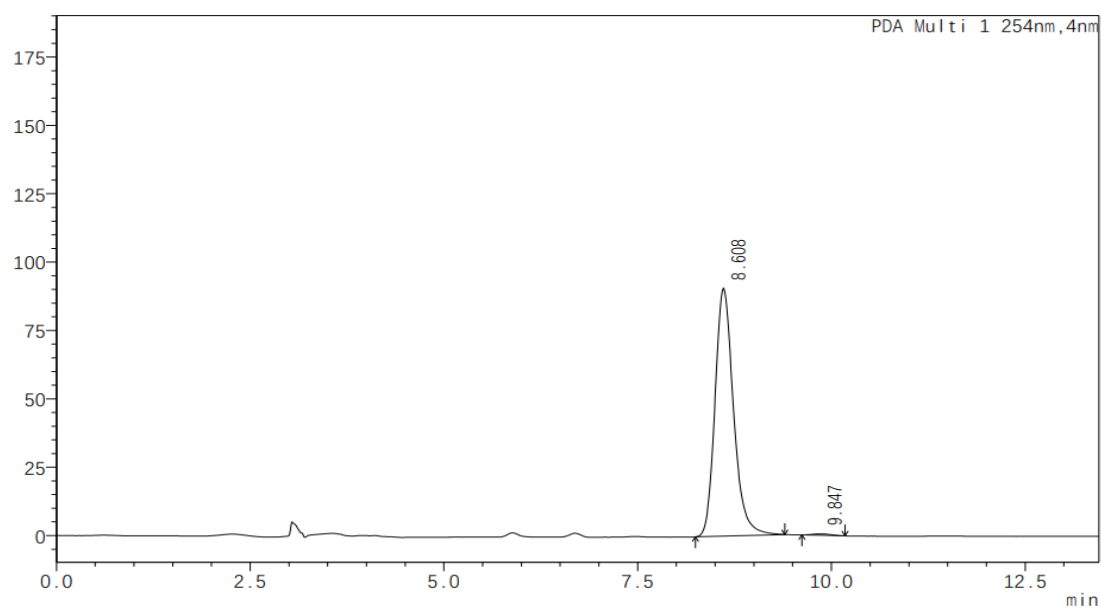

PDA Ch1 254nm

| NO. | Ret. Time | Area(uAU*min) | Height(uAU) | Rel. Area % | Resolution(USP) |
|-----|-----------|---------------|-------------|-------------|-----------------|
| 1   | 8.608     | 1505820       | 90689       | 99.403      | 0.434           |
| 2   | 9.847     | 9041          | 553         | 0.597       | 0.457           |

**(9a*R*,10*R*,15a*R*)-10-hydroxy-6-methoxy-10-methyl-9a,15a-dihydrodibenzo  
[4,5:6,7] cyclohepta[1,2-*b*] thiochromen-9(10*H*)-one (3h)**

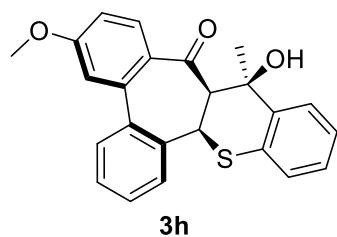

Flash column chromatography on silica gel (hexane/EtOAc, 16:1) gave the product **3h** (31.4 mg, 81% yield) as a white solid.  $[\alpha]_D^{25} = 78$  ( $c = 1.0$  in DCM, 99% ee, >20:1 dr).  $^1\text{H NMR}$  (500 MHz,  $\text{CDCl}_3$ )  $\delta$  7.70 (d,  $J = 7.7$  Hz, 1H), 7.53 – 7.32 (m, 2H), 7.36 (t,  $J = 7.5$  Hz, 2H), 7.07 (t,  $J = 7.5$  Hz, 1H), 6.92 (t,  $J = 7.5$  Hz, 1H), 6.86 (s, 1H), 6.63 (d,  $J = 7.8$  Hz, 1H), 6.52 (s, 2H), 5.11 (s, 1H), 5.05 (d,  $J = 4.8$  Hz, 1H), 3.86 (s, 3H), 3.39 (d,  $J = 4.8$  Hz, 1H), 1.70 (s, 3H).  $^{13}\text{C NMR}$  (126 MHz,  $\text{CDCl}_3$ )  $\delta$  207.72, 163.08, 141.12, 140.07, 139.24, 136.38, 134.85, 132.37, 131.32, 130.71, 129.80, 129.64, 128.84, 127.13, 125.09, 125.02, 124.77, 113.21, 113.18, 75.25, 63.46, 55.59, 44.70, 27.30. HRMS (ESI)  $m/z$  calcd for  $\text{C}_{24}\text{H}_{21}\text{O}_3\text{S}^+$  ( $\text{M}+\text{H}$ ) $^+$  389.1206, found 389.1205. The ee of compound **3h** was determined by HPLC using an AD-H column (0.46 cm x 25 cm), *n*-hexane/*i*-PrOH = 90/10, flow rate = 1.0 mL/min,  $\lambda = 254$  nm,  $t(\text{minor}) = 18.311$  min,  $t(\text{major}) = 20.684$  min.

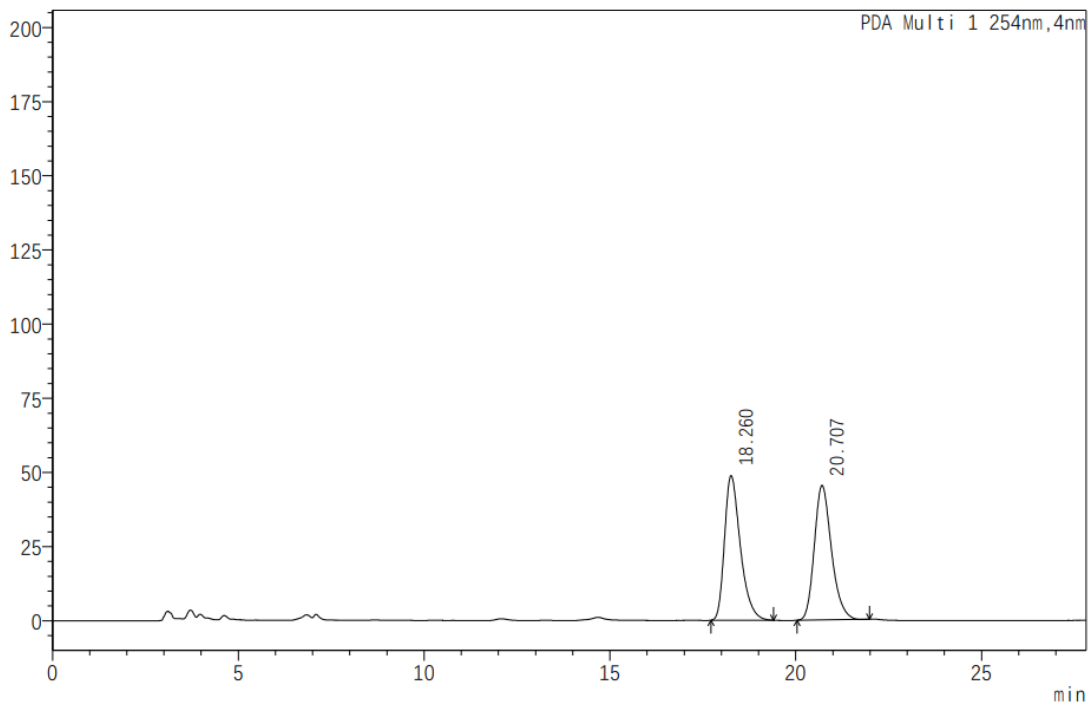

PDA Ch1 254nm

| NO. | Ret.Time | Area(uAU*min) | Height(uAU) | Rel.Area % | Resolution(USP) |
|-----|----------|---------------|-------------|------------|-----------------|
| 1   | 18.260   | 1448077       | 48794       | 49.918     | 0.769           |
| 2   | 20.707   | 1452817       | 45351       | 50.082     | 0.839           |

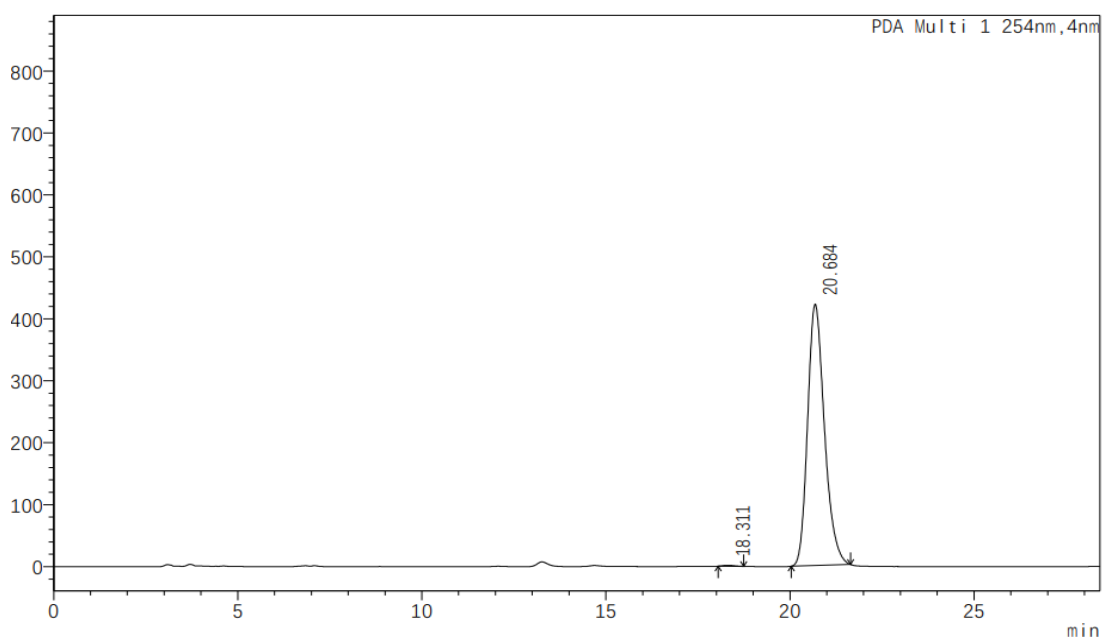

PDA Ch1 254nm

| NO. | Ret.Time | Area(uAU*min) | Height(uAU) | Rel.Area % | Resolution(USP) |
|-----|----------|---------------|-------------|------------|-----------------|
| 1   | 18.311   | 33520         | 1526        | 0.249      | 0.610           |
| 2   | 20.684   | 13433371      | 421779      | 99.751     | 0.832           |

**(9*aR*,10*R*,15*aR*)-10-hydroxy-2-methoxy-10-methyl-9*a*,15*a*-dihydrodibenzo  
[4,5:6,7] cyclohepta[1,2-*b*] thiochromen-9(10*H*)-one (3i)**

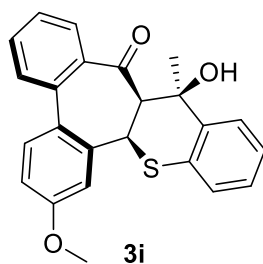

Flash column chromatography on silica gel (hexane/EtOAc, 16:1) gave the product **3i** (30.6 mg, 79% yield) as a white solid.  $[\alpha]_D^{25} = 32$  ( $c = 1.0$  in DCM, 93% ee, >20:1 dr).  $^1\text{H NMR}$  (500 MHz,  $\text{CDCl}_3$ )  $\delta$  7.69 (d,  $J = 7.6$  Hz, 1H), 7.45 (t,  $J = 7.3$  Hz, 1H), 7.36 (d,  $J = 8.4$  Hz, 1H), 7.30 (d,  $J = 7.6$  Hz, 1H), 7.07 (t,  $J = 7.2$  Hz, 1H), 6.99 (d,  $J = 8.4$  Hz, 1H), 6.92 (m, 3H), 6.56 (d,  $J = 7.6$  Hz, 1H), 6.43 (d,  $J = 7.4$  Hz, 1H), 5.04 – 4.94 (m, 1H), 4.79 (s, 1H), 3.88 (s, 3H), 3.45 (s, 1H), 1.71 (s, 3H).  $^{13}\text{C NMR}$  (126 MHz,  $\text{CDCl}_3$ )  $\delta$  209.30, 159.77, 139.90, 139.09, 138.72, 137.47, 134.85, 132.70, 132.47, 131.49, 128.15, 127.86, 127.23, 127.02, 125.21, 124.96, 124.86, 115.52, 114.63, 75.08, 64.14, 55.62, 44.90, 27.16. HRMS (ESI)  $m/z$  calcd for  $\text{C}_{24}\text{H}_{21}\text{O}_3\text{S}^+$  ( $\text{M}+\text{H}$ ) $^+$  389.1206, found 389.1201. The ee of compound **3i** was determined by HPLC using a MX (2) column (0.46 cm x 25 cm), *n*-hexane/*i*-PrOH = 94/6, flow rate = 1.0 mL/min,  $\lambda = 254$  nm,  $t(\text{minor}) = 11.938$  min,  $t(\text{major}) = 13.081$  min.

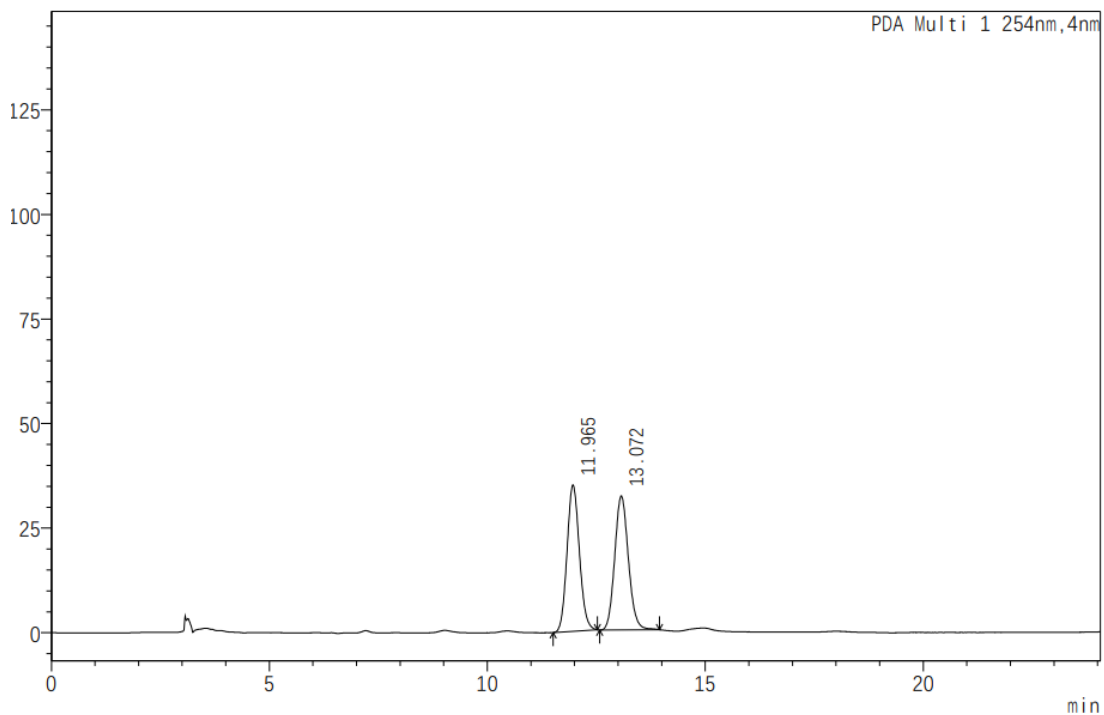

PDA Ch1 254nm

| NO. | Ret. Time | Area(uAU*min) | Height(uAU) | Rel. Area % | Resolution(USP) |
|-----|-----------|---------------|-------------|-------------|-----------------|
| 1   | 11.965    | 691118        | 35013       | 49.734      | 0.526           |
| 2   | 13.072    | 698517        | 32026       | 50.266      | 0.576           |

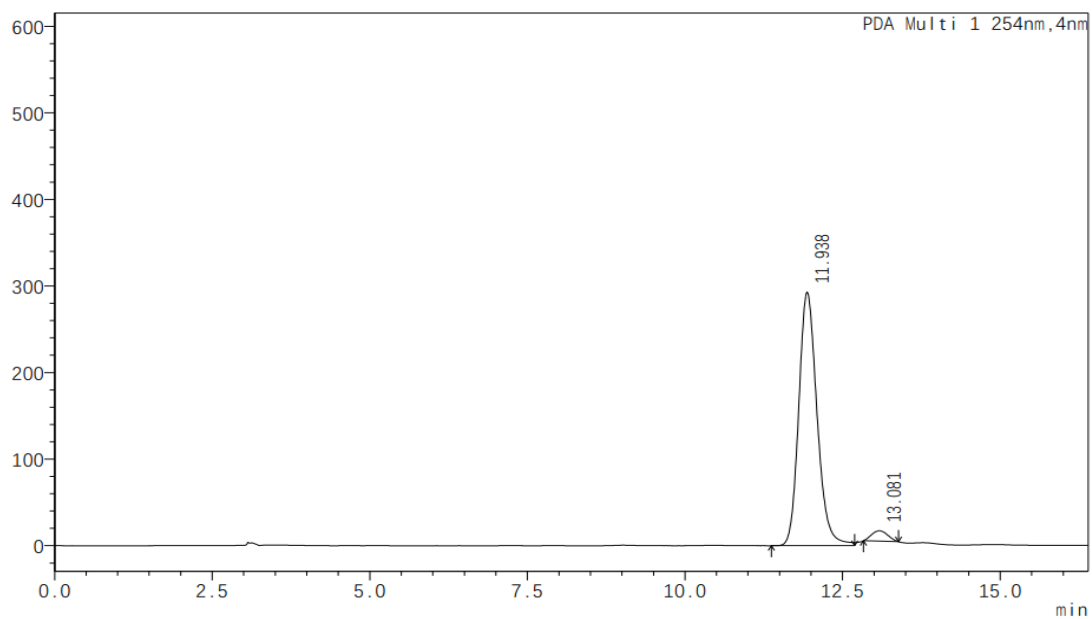

PDA Ch1 254nm

| NO. | Ret. Time | Area(uAU*min) | Height(uAU) | Rel. Area % | Resolution(USP) |
|-----|-----------|---------------|-------------|-------------|-----------------|
| 1   | 11.938    | 5905203       | 292890      | 96.495      | 0.528           |
| 2   | 13.081    | 214500        | 12069       | 3.505       | 0.497           |

**(9a*R*,10*R*,15a*R*)-10-hydroxy-6,10-dimethyl-9a,15a-dihydrodibenzo [4,5:6,7] cyclohepta[1,2-*b*] thiochromen-9(10*H*)-one (3j)**



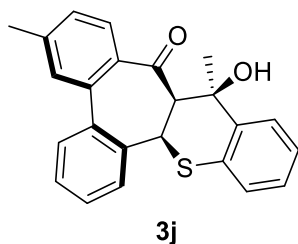

Flash column chromatography on silica gel (hexane/EtOAc, 16:1) gave the product **3j** (31.28 mg, 84% yield) as a white solid.  $[\alpha]_D^{25} = -20$  ( $c = 1.0$  in DCM, 99% ee, >20:1 dr).  $^1\text{H NMR}$  (500 MHz,  $\text{CDCl}_3$ )  $\delta$  7.69 (d,  $J = 7.6$  Hz, 1H), 7.45 (s, 2H), 7.38 (d,  $J = 7.5$  Hz, 2H), 7.18 (s, 1H), 7.07 (t,  $J = 7.1$  Hz, 1H), 6.92 (t,  $J = 7.2$  Hz, 1H), 6.81 (d,  $J = 7.7$  Hz, 1H), 6.58 (d,  $J = 7.5$  Hz, 1H), 6.41 (d,  $J = 7.6$  Hz, 1H), 5.04 (s, 1H), 4.94 (s, 1H), 3.42 (s, 1H), 2.39 (s, 3H), 1.70 (s, 3H).  $^{13}\text{C NMR}$  (126 MHz,  $\text{CDCl}_3$ )  $\delta$  208.75, 143.06, 139.90, 139.23, 138.67, 136.60, 136.12, 134.74, 131.25, 129.69, 129.51, 128.63, 128.50, 128.31, 127.04, 125.03, 124.88, 124.67, 75.04, 63.85, 44.59, 27.16, 26.93, 21.66. HRMS (ESI)  $m/z$  calcd for  $\text{C}_{24}\text{H}_{21}\text{O}_2\text{S}^+$  ( $\text{M}+\text{H}$ ) $^+$  373.1257, found 373.1258. The ee of compound **3j** was determined by HPLC using a MX (2) column (0.46 cm x 25 cm), *n*-hexane/*i*-PrOH = 94/6, flow rate = 1.0 mL/min,  $\lambda = 254$  nm,  $t(\text{minor}) = 8.742$  min,  $t(\text{major}) = 9.326$  min.

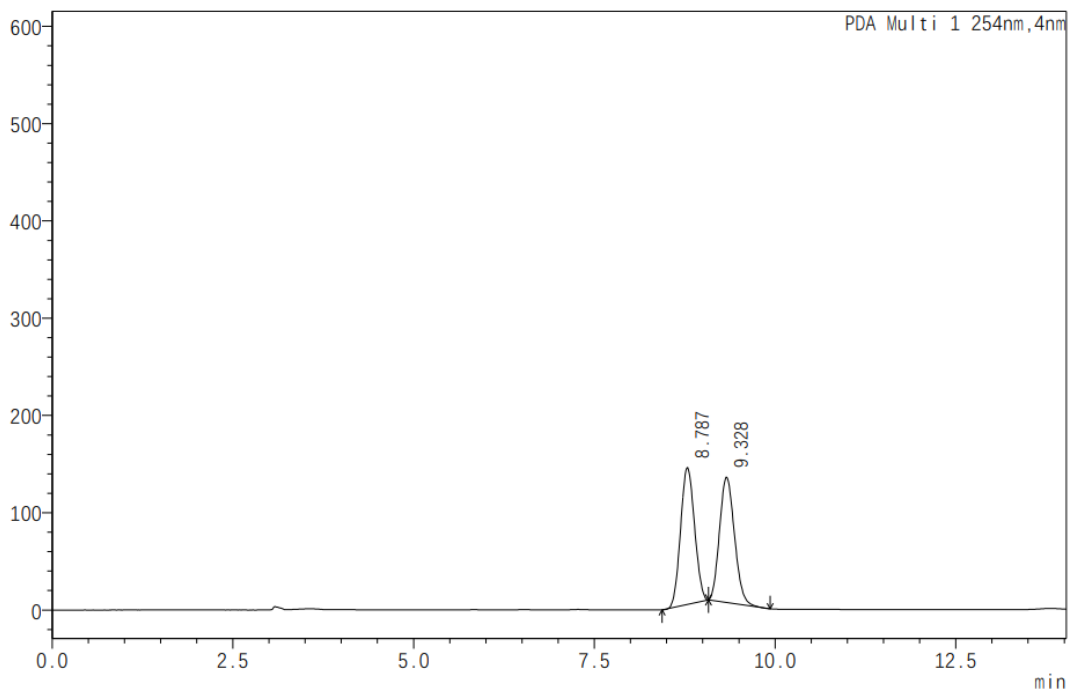

PDA\_Ch1\_254nm

| NO. | Ret. Time | Area(uAU*min) | Height(uAU) | Rel. Area % | Resolution(USP) |
|-----|-----------|---------------|-------------|-------------|-----------------|
| 1   | 8.787     | 1892166       | 140757      | 50.509      | 0.371           |
| 2   | 9.328     | 1854045       | 128700      | 49.491      | 0.391           |

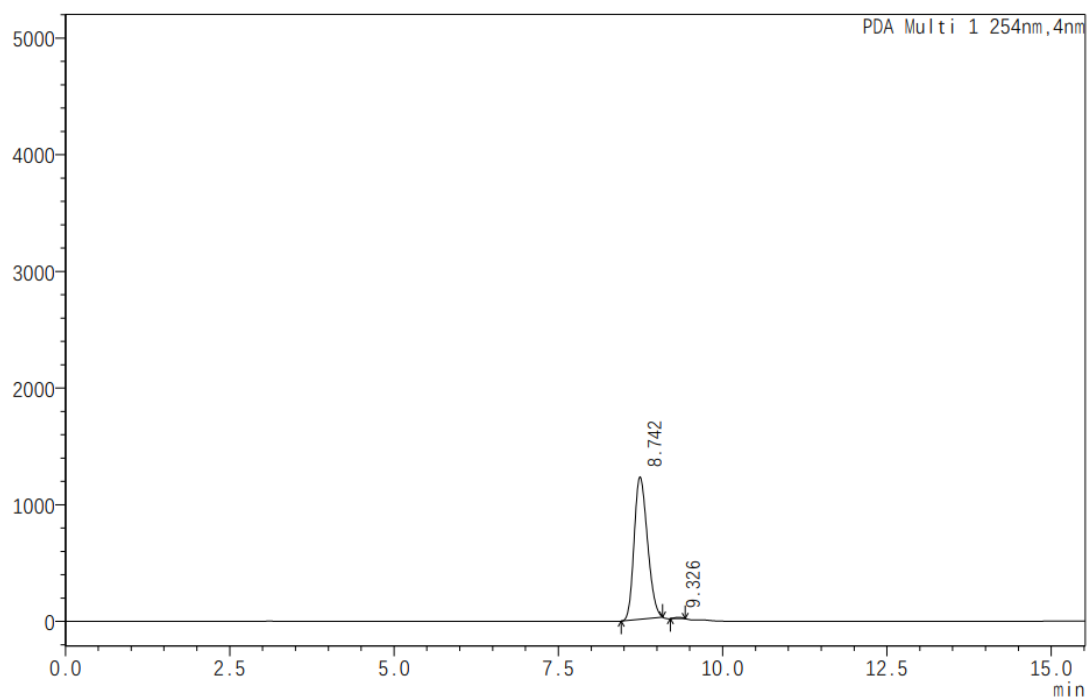

PDA\_Ch1\_254nm

| NO. | Ret. Time | Area(uAU*min) | Height(uAU) | Rel. Area % | Resolution(USP) |
|-----|-----------|---------------|-------------|-------------|-----------------|
| 1   | 8.742     | 17274955      | 1220249     | 99.475      | 0.386           |
| 2   | 9.326     | 91200         | 11277       | 0.525       | 0.231           |

**(9aR,10R,15aR)-10-hydroxy-7-methoxy-10-methyl-9a,15a-dihydrodibenzo  
[4,5:6,7] cyclohepta[1,2-b] thiochromen-9(10H)-one (3k)**

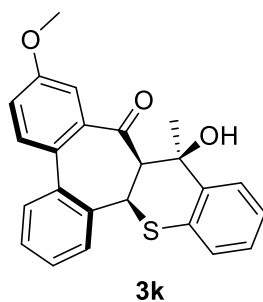

Flash column chromatography on silica gel (hexane/EtOAc, 16:1) gave the product **3k** (29.5mg, 76% yield) as a white solid.  $[\alpha]_D^{25} = 6$  ( $c = 1.0$  in DCM, 89% ee,  $>20:1$  dr).  $^1\text{H NMR}$  (500 MHz,  $\text{CDCl}_3$ )  $\delta$  7.70 (d,  $J = 7.7$  Hz, 1H), 7.43 (t,  $J = 7.2$  Hz, 1H), 7.40 – 7.34 (m, 2H), 7.32 (t,  $J = 7.2$  Hz, 1H), 7.26 (d,  $J = 8.3$  Hz, 1H), 7.09 (t,  $J = 7.4$  Hz, 1H), 7.03 (d,  $J = 8.5$  Hz, 1H), 6.93 (t,  $J = 7.4$  Hz, 1H), 6.61 (d,  $J = 7.7$  Hz, 1H), 5.86 (s, 1H), 5.02 (d,  $J = 4.9$  Hz, 1H), 4.66 (s, 1H), 3.51 (s, 3H), 3.45 (d,  $J = 4.9$  Hz, 1H), 1.72 (s, 3H).  $^{13}\text{C NMR}$  (126 MHz,  $\text{CDCl}_3$ )  $\delta$  209.13, 158.83, 140.06, 140.02, 138.97, 135.76, 135.43, 131.60, 131.03, 129.78, 129.66, 129.62, 128.12, 127.11, 125.51, 125.01, 124.71, 120.37, 110.74, 75.13, 64.84, 55.29, 44.71, 26.66. HRMS (ESI)  $m/z$  calcd for  $\text{C}_{24}\text{H}_{21}\text{O}_3\text{S}^+$  ( $\text{M}+\text{H}$ ) $^+$  389.1206, found 389.1201. The ee of compound **3k** was determined by HPLC using a MX (2) column (0.46 cm x 25 cm), *n*-hexane/*i*-PrOH = 94/6, flow rate = 1.0 mL/min,  $\lambda = 254$  nm,  $t(\text{minor}) = 10.501$  min,  $t(\text{major}) = 13.063$  min.

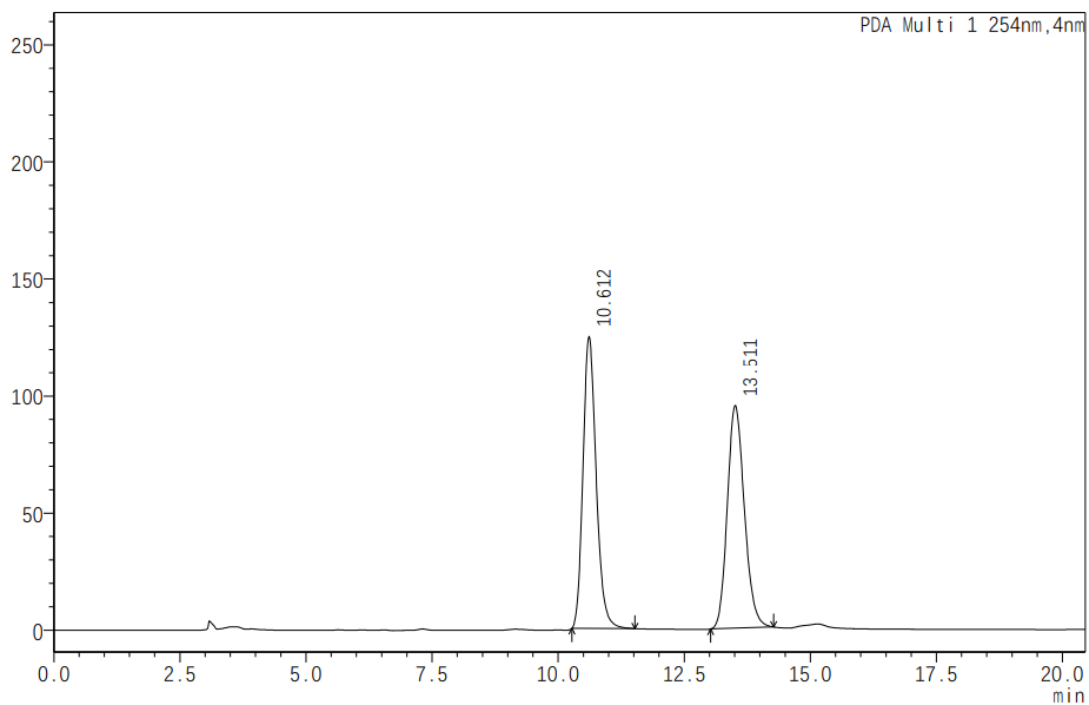

PDA Ch1 254nm

| NO. | Ret.Time | Area(uAU*min) | Height(uAU) | Rel.Area % | Resolution(USP) |
|-----|----------|---------------|-------------|------------|-----------------|
| 1   | 10.612   | 2273903       | 124843      | 50.370     | 0.480           |
| 2   | 13.511   | 2240535       | 95143       | 49.630     | 0.623           |

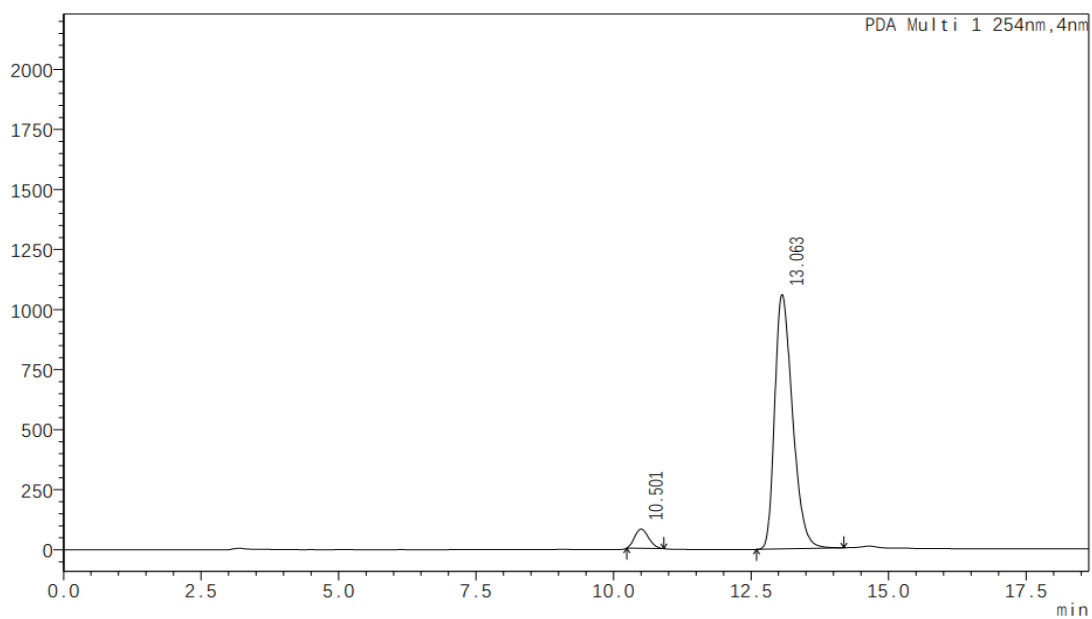

PDA Ch1 254nm

| NO. | Ret.Time | Area(uAU*min) | Height(uAU) | Rel.Area % | Resolution(USP) |
|-----|----------|---------------|-------------|------------|-----------------|
| 1   | 10.501   | 1413365       | 80167       | 5.578      | 0.482           |
| 2   | 13.063   | 23926184      | 1058519     | 94.422     | 0.597           |

**(9a*R*,10*R*,15a*R*)-10-hydroxy-3,6-dimethoxy-10-methyl-9a,15a-dihydrodibenzo  
[4,5:6,7] cyclohepta[1,2-*b*] thiochromen-9(10*H*)-one (3I)**

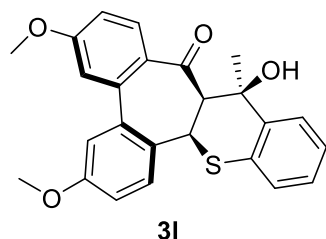

Flash column chromatography on silica gel (hexane/EtOAc, 8:1) gave the product **31** (29.7 mg, 71% yield) as a white solid.  $[\alpha]_D^{25} = -36$  ( $c = 1.0$  in DCM, 90% ee, >20:1 dr).  $^1\text{H NMR}$  (500 MHz,  $\text{CDCl}_3$ )  $\delta$  7.69 (d,  $J = 7.7$  Hz, 1H), 7.37 (d,  $J = 8.5$  Hz, 1H), 7.06 (t,  $J = 7.5$  Hz, 1H), 6.98 (dd,  $J = 8.5, 2.5$  Hz, 1H), 6.95 – 6.88 (m, 2H), 6.80 (d,  $J = 2.0$  Hz, 1H), 6.63 (d,  $J = 7.7$  Hz, 1H), 6.59 – 6.44 (m, 2H), 5.15 (s, 1H), 4.98 (d,  $J = 4.7$  Hz, 1H), 3.88 (s, 3H), 3.85 (s, 3H), 3.38 (d,  $J = 4.7$  Hz, 1H), 1.69 (s, 3H).  $^{13}\text{C NMR}$  (101 MHz,  $\text{CDCl}_3$ )  $\delta$  207.83, 163.09, 159.89, 141.05, 140.09, 137.68, 134.79, 132.64, 132.34, 131.53, 130.76, 127.17, 125.09, 124.78, 115.50, 114.59, 112.95, 112.67, 75.26, 63.11, 55.65, 55.57, 45.01, 27.42. HRMS (ESI)  $m/z$  calcd for  $\text{C}_{25}\text{H}_{23}\text{O}_4\text{S}^+$  ( $\text{M}+\text{H}$ ) $^+$  419.1312, found 419.1298. The ee of compound **31** was determined by HPLC using an AD-H column (0.46 cm x 25 cm), *n*-hexane/*i*-PrOH = 90/10, flow rate = 1.0 mL/min,  $\lambda = 254$  nm,  $t(\text{major}) = 38.900$  min,  $t(\text{minor}) = 53.615$  min.

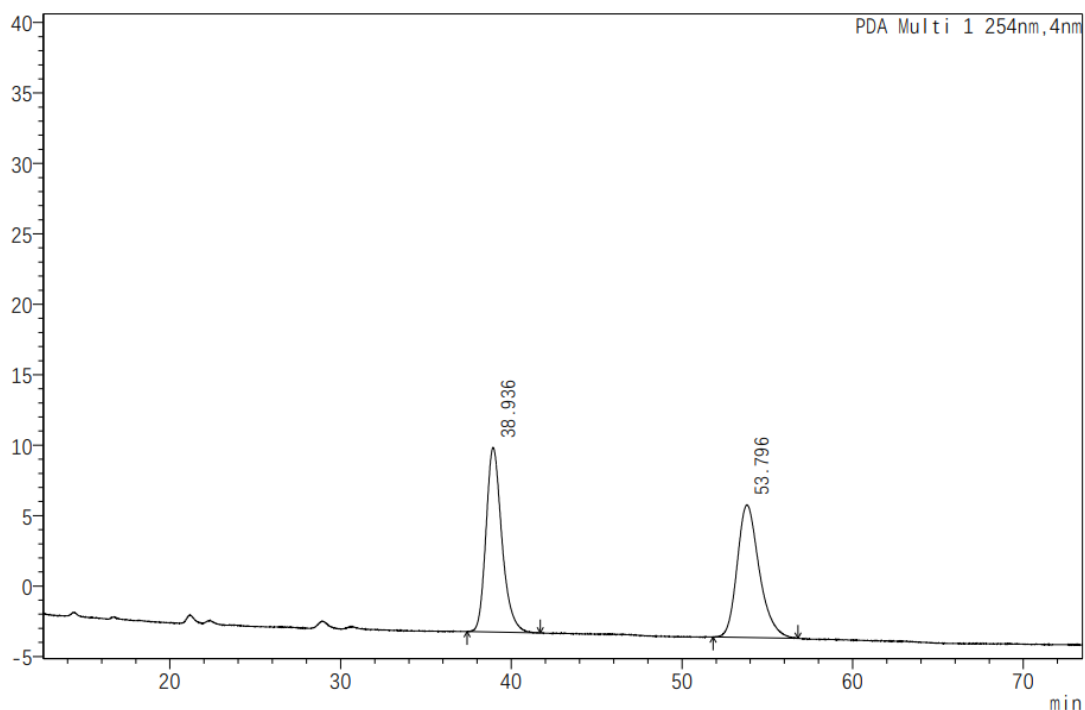

PDA Ch1 254nm

| NO. | Ret. Time | Area(uAU*min) | Height(uAU) | Rel. Area % | Resolution(USP) |
|-----|-----------|---------------|-------------|-------------|-----------------|
| 1   | 38.936    | 846826        | 13090       | 50.018      | 1.660           |
| 2   | 53.796    | 846233        | 9412        | 49.982      | 2.332           |

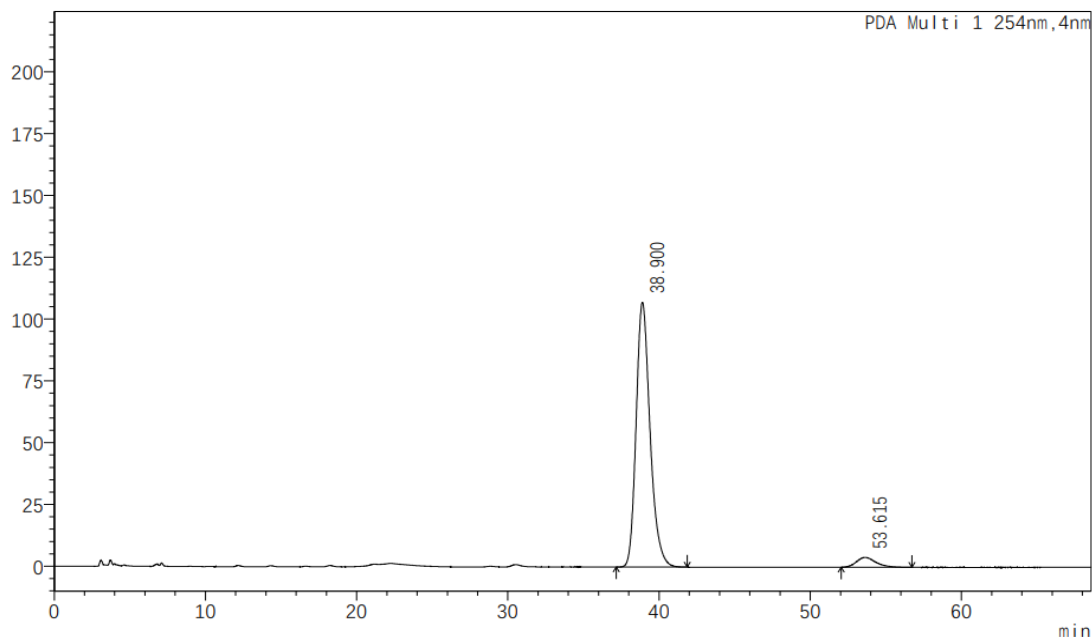

PDA Ch1 254nm

| NO. | Ret. Time | Area(uAU*min) | Height(uAU) | Rel. Area % | Resolution(USP) |
|-----|-----------|---------------|-------------|-------------|-----------------|
| 1   | 38.900    | 6859196       | 107115      | 95.105      | 1.650           |
| 2   | 53.615    | 353075        | 3964        | 4.895       | 2.300           |

**(9a*R*,10*R*,15a*R*)-3-fluoro-10-hydroxy-6-methoxy-10-methyl-9a,15a-dihydrodi-  
benzo [4,5:6,7] cyclohepta [1,2-*b*] thiochromen-9(10*H*)-one (3m)**

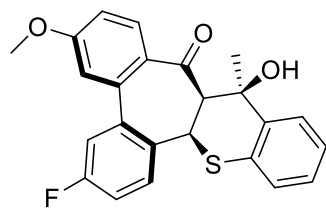

**3m**

Flash column chromatography on silica gel (hexane/EtOAc, 16:1) gave the product **3m** (38.6 mg, 95% yield) as a white solid.  $[\alpha]_D^{25} = -78$  ( $c = 1.0$  in DCM, 96% ee, >20:1 dr).  $^1\text{H NMR}$  (500 MHz,  $\text{CDCl}_3$ )  $\delta$  7.71 (d,  $J = 7.8$  Hz, 1H), 7.39 (t,  $J = 6.7$  Hz, 1H), 7.18 (d,  $J = 9.5$  Hz, 1H), 7.08 (q,  $J = 10.5, 9.0$  Hz, 2H), 6.94 (t,  $J = 7.5$  Hz, 1H), 6.85 (s, 1H), 6.63 (d,  $J = 7.8$  Hz, 1H), 6.56 (d,  $J = 10.9$  Hz, 2H), 5.06 (s, 1H), 3.89 (s, 3H), 3.39 (d,  $J = 4.1$  Hz, 1H), 1.71 (s, 3H).  $^{13}\text{C NMR}$  (126 MHz,  $\text{CDCl}_3$ )  $\delta$  207.32, 163.33 (d,  $J = 248.2$  Hz), 163.16, 141.49 (d,  $J = 8.8$  Hz), 140.00, 139.88, 134.70, 132.32,

132.30, 132.27, 131.59 (d,  $J = 7.6$  Hz), 130.88, 127.19, 125.08, 124.90, 118.19 (d,  $J = 22.7$  Hz), 115.34 (d,  $J = 20.2$  Hz), 113.74, 113.11, 75.27, 63.51, 55.66, 43.95, 27.24.  $^{19}\text{F}$  NMR (377 MHz,  $\text{CDCl}_3$ )  $\delta$  -87.65. HRMS (ESI)  $m/z$  calcd for  $\text{C}_{24}\text{H}_{20}\text{FO}_3\text{S}^+$  (M+H) $^+$  407.1112, found 407.1134. The ee of compound **3m** was determined by HPLC using a MX (2) column (0.46 cm x 25 cm),  $n$ -hexane/ $i$ -PrOH = 94/6, flow rate = 1.0 mL/min,  $\lambda = 272$  nm,  $t(\text{major}) = 6.376$  min,  $t(\text{minor}) = 8.625$  min.

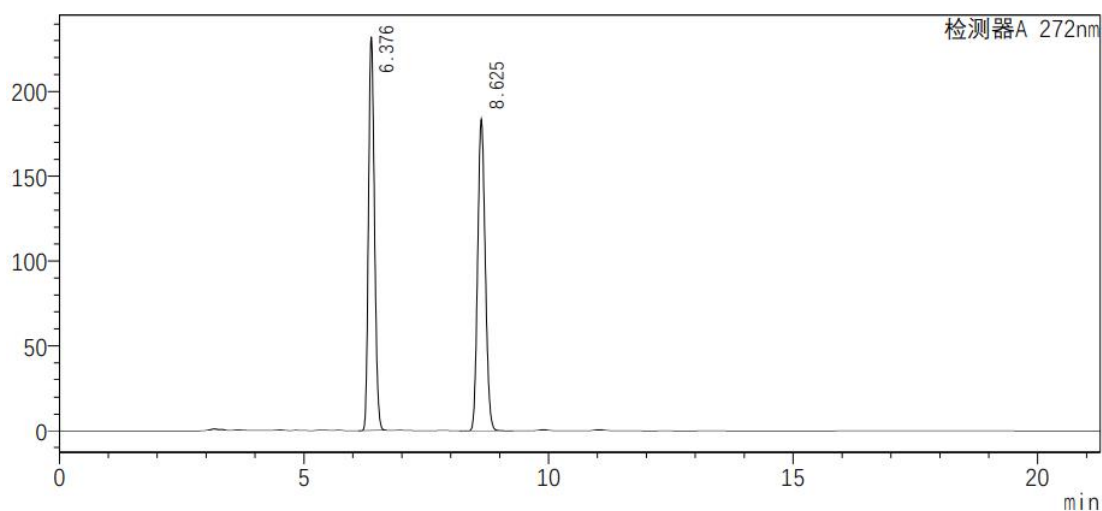

| NO. | Ret. Time | Area(uAU*min) | Height(uAU) | Rel. Area % | Resolution(USP) |
|-----|-----------|---------------|-------------|-------------|-----------------|
| 1   | 6.376     | 1965045       | 231901      | 49.795      | 0.234           |
| 2   | 8.625     | 1981236       | 183399      | 50.205      | 0.293           |

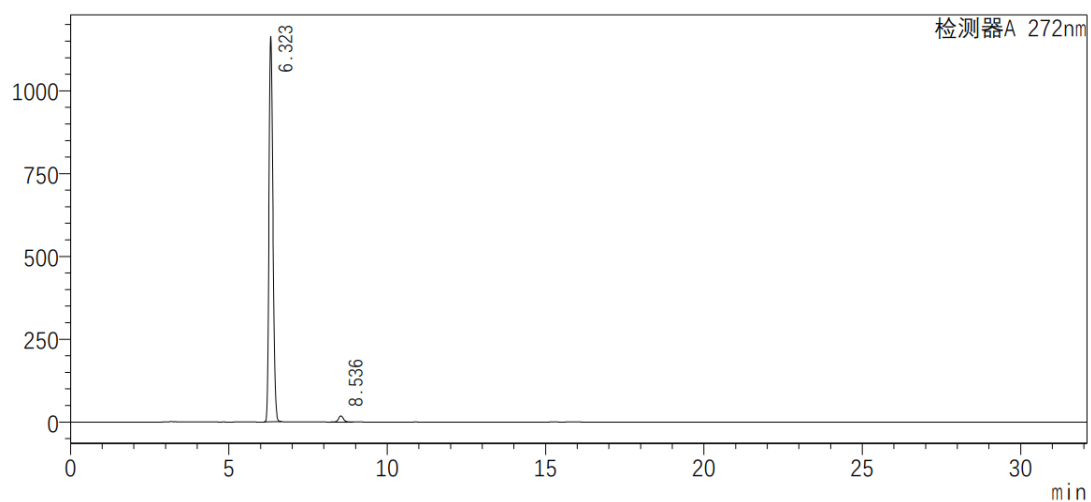

| NO. | Ret. Time | Area(uAU*min) | Height(uAU) | Rel. Area % | Resolution(USP) |
|-----|-----------|---------------|-------------|-------------|-----------------|
| 1   | 6.323     | 9980740       | 1163611     | 98.077      | 0.237           |
| 2   | 8.536     | 195658        | 18242       | 1.923       | 0.289           |

**(9aR,10R,15aR)-6-fluoro-10-hydroxy-3,10-dimethyl-9a,15a-dihydrodibenzo**

**[4,5:6,7] cyclohepta[1,2-*b*] thiochromen-9(10*H*)-one (3n)**

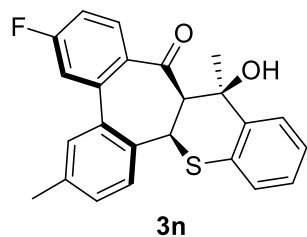

Flash column chromatography on silica gel (hexane/EtOAc, 16:1) gave the product **3n** (33.9 mg, 87% yield) as a white solid.  $[\alpha]_D^{25} = -44$  ( $c = 1.0$  in DCM, 96% ee, >20:1 dr).  $^1\text{H NMR}$  (500 MHz,  $\text{CDCl}_3$ )  $\delta$  7.68 (d,  $J = 7.6$  Hz, 1H), 7.28 (d,  $J = 7.6$  Hz, 1H), 7.24 – 7.14 (m, 2H), 7.11 – 7.00 (m, 2H), 6.93 (t,  $J = 7.5$  Hz, 1H), 6.65 (t,  $J = 8.3$  Hz, 1H), 6.61 (d,  $J = 7.8$  Hz, 1H), 6.46 (t,  $J = 7.0$  Hz, 1H), 5.01 (d,  $J = 4.2$  Hz, 1H), 4.74 (s, 1H), 3.40 (d,  $J = 4.2$  Hz, 1H), 2.41 (s, 3H), 1.70 (s, 3H).  $^{13}\text{C NMR}$  (126 MHz,  $\text{CDCl}_3$ )  $\delta$  207.97, 165.30 (d,  $J = 253.3$  Hz), 141.94, 141.86, 139.94, 139.85, 137.97, 135.72, 135.02, 133.46, 132.06, 130.94 (d,  $J = 10.1$  Hz), 129.90, 129.88, 127.32, 125.11 (d,  $J = 26.5$  Hz), 124.94, 114.78 (d,  $J = 13.9$  Hz), 114.60 (d,  $J = 12.6$  Hz), 75.21, 64.28, 44.20, 27.11, 21.30.  $^{19}\text{F NMR}$  (471 MHz,  $\text{CDCl}_3$ )  $\delta$  -106.12. HRMS (ESI)  $m/z$  calcd for  $\text{C}_{24}\text{H}_{20}\text{FO}_2\text{S}^+$  ( $\text{M}+\text{H}$ ) $^+$  391.1163, found 391.1170. The ee of compound **3n** was determined by HPLC using a MX (2) column (0.46 cm x 25 cm), *n*-hexane/*i*-PrOH = 94/6, flow rate = 1.0 mL/min,  $\lambda = 254$  nm,  $t(\text{major}) = 6.953$  min,  $t(\text{minor}) = 7.509$  min.



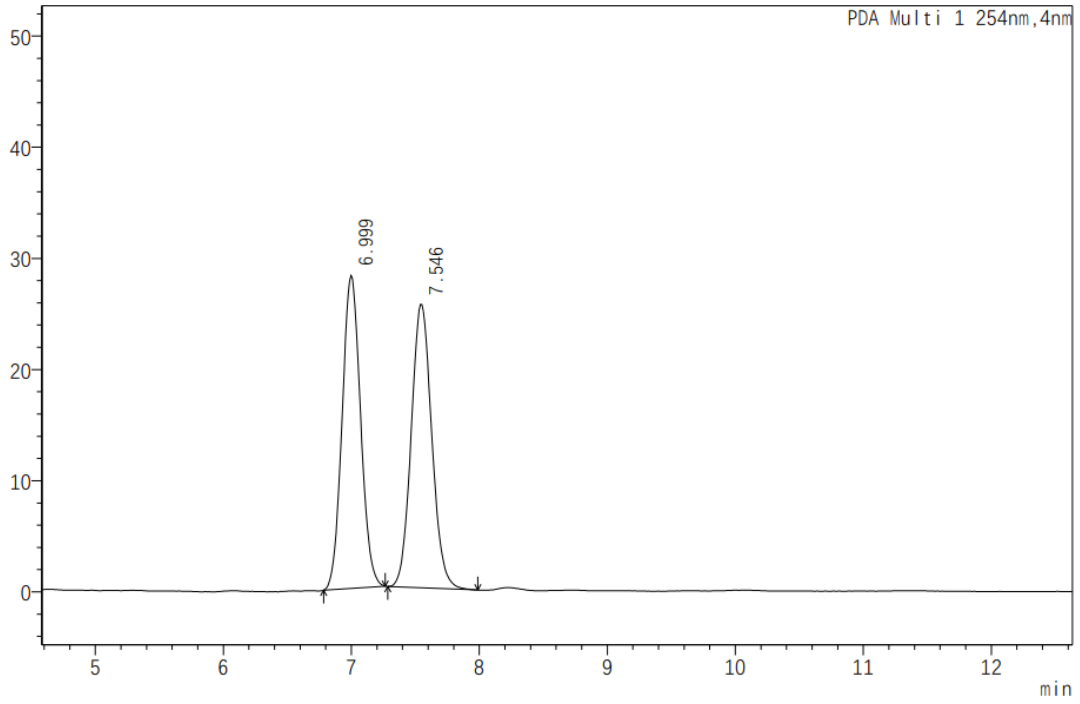

PDA Ch1 254nm

| NO. | Ret. Time | Area(uAU*min) | Height(uAU) | Rel. Area % | Resolution(USP) |
|-----|-----------|---------------|-------------|-------------|-----------------|
| 1   | 6.999     | 282209        | 28149       | 49.797      | 0.278           |
| 2   | 7.546     | 284508        | 25517       | 50.203      | 0.304           |

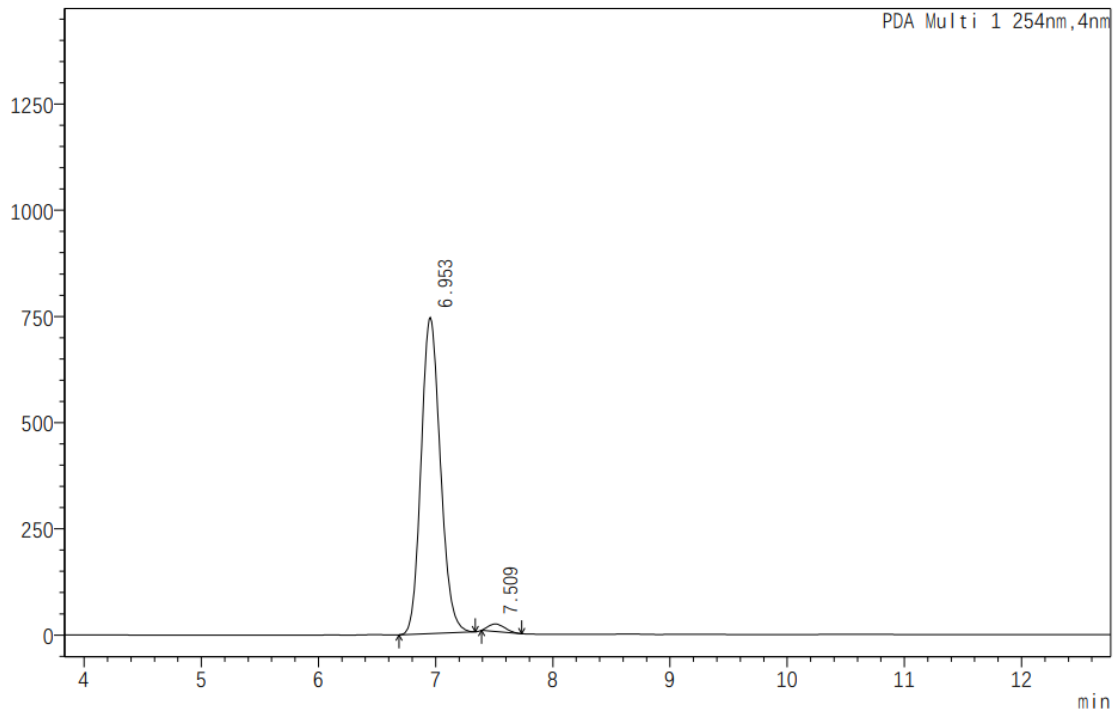

PDA Ch1 254nm

| NO. | Ret. Time | Area(uAU*min) | Height(uAU) | Rel. Area % | Resolution(USP) |
|-----|-----------|---------------|-------------|-------------|-----------------|
| 1   | 6.953     | 8509393       | 744609      | 98.064      | 0.312           |
| 2   | 7.509     | 168034        | 17381       | 1.936       | 0.273           |

**(9a*R*,10*R*,15a*R*)-3-fluoro-10-hydroxy-7-methoxy-10-methyl-9a,15a-dihydrodibenzo [4,5:6,7] cyclohepta [1,2-*b*] thiochromen-9(10*H*)-one (3o)**

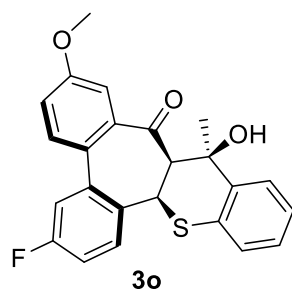

Flash column chromatography on silica gel (hexane/EtOAc, 16:1) gave the product **3o** (35.7 mg, 88% yield) as a white solid.  $[\alpha]_D^{25} = 28$  ( $c = 1.0$  in DCM, 93% ee, > 20:1 dr).  $^1\text{H NMR}$  (500 MHz,  $\text{CDCl}_3$ )  $\delta$  7.74 (dd,  $J = 7.8, 1.3$  Hz, 1H), 7.37 (dd,  $J = 8.4, 5.6$  Hz, 1H), 7.26 (d,  $J = 8.6$  Hz, 1H), 7.15 – 7.09 (m, 2H), 7.08 – 7.00 (m, 2H), 6.96 (td,  $J = 7.7, 1.4$  Hz, 1H), 6.81 – 6.48 (m, 1H), 5.88 (d,  $J = 2.7$  Hz, 1H), 5.04 (d,  $J = 5.1$  Hz, 1H), 4.63 (s, 1H), 3.54 (s, 3H), 3.46 (d,  $J = 5.2$  Hz, 1H), 1.74 (s, 3H).  $^{13}\text{C NMR}$  (101 MHz,  $\text{CDCl}_3$ )  $\delta$  208.68, 163.39 (d,  $J = 249$ . Hz), 159.23, 141.25 (d,  $J = 8.1$  Hz), 140.06, 139.96, 135.26, 131.53 (d,  $J = 8.1$  Hz), 131.64 (d,  $J = 3.0$  Hz), 130.36, 129.53, 117.80 (d,  $J = 22.2$  Hz), 127.16, 125.49, 125.03, 124.81, 114.62 (d,  $J = 21.2$  Hz), 120.38, 110.93, 75.14, 64.86, 55.32, 43.95, 26.62.  $^{19}\text{F NMR}$  (471 MHz,  $\text{CDCl}_3$ )  $\delta$  -112.44. HRMS (ESI)  $m/z$  calcd for  $\text{C}_{24}\text{H}_{20}\text{FO}_3\text{S}^+$  ( $\text{M}+\text{H}$ ) $^+$  407.1112, found 407.1124.

The ee of compound **3o** was determined by HPLC using an AD-H column (0.46 cm x 25 cm), *n*-hexane/*i*-PrOH = 80/20, flow rate = 1.0 mL/min,  $\lambda = 254$  nm,  $t(\text{minor}) = 24.687$  min,  $t(\text{major}) = 27.775$  min.

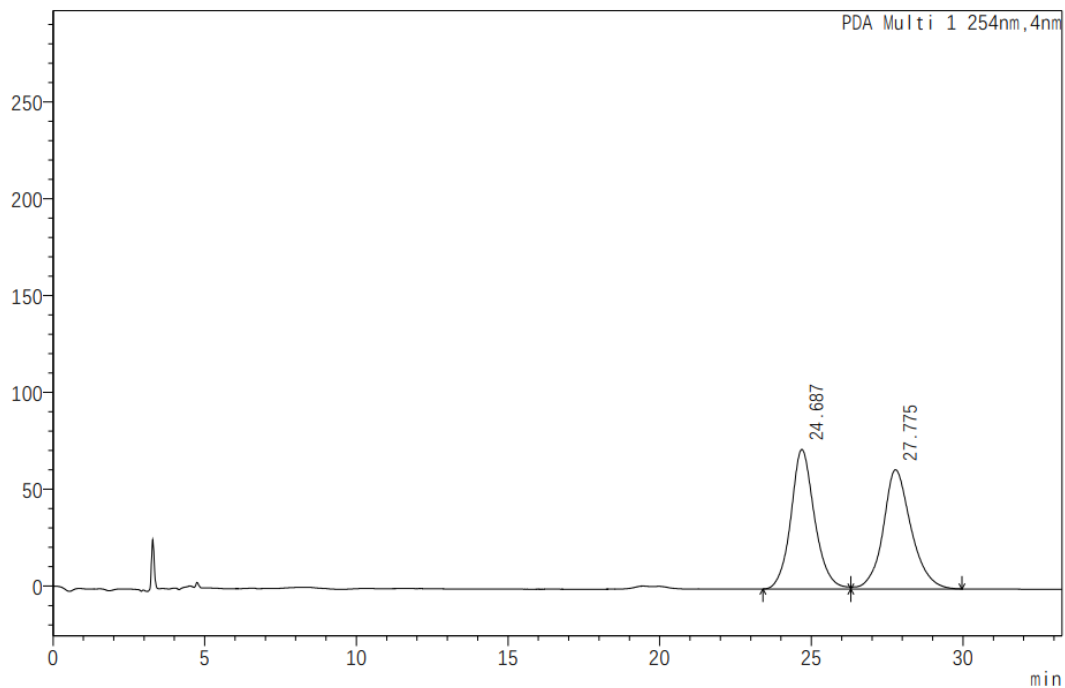

| NO. | Ret.Time | Height(uAU) | Area(uAU*min) | Rel.Area % | Resolution(USP) |
|-----|----------|-------------|---------------|------------|-----------------|
| 1   | 24.687   | 72104       | 3923940       | 49.762     | --              |
| 2   | 27.775   | 61599       | 3961479       | 50.238     | 2.054           |

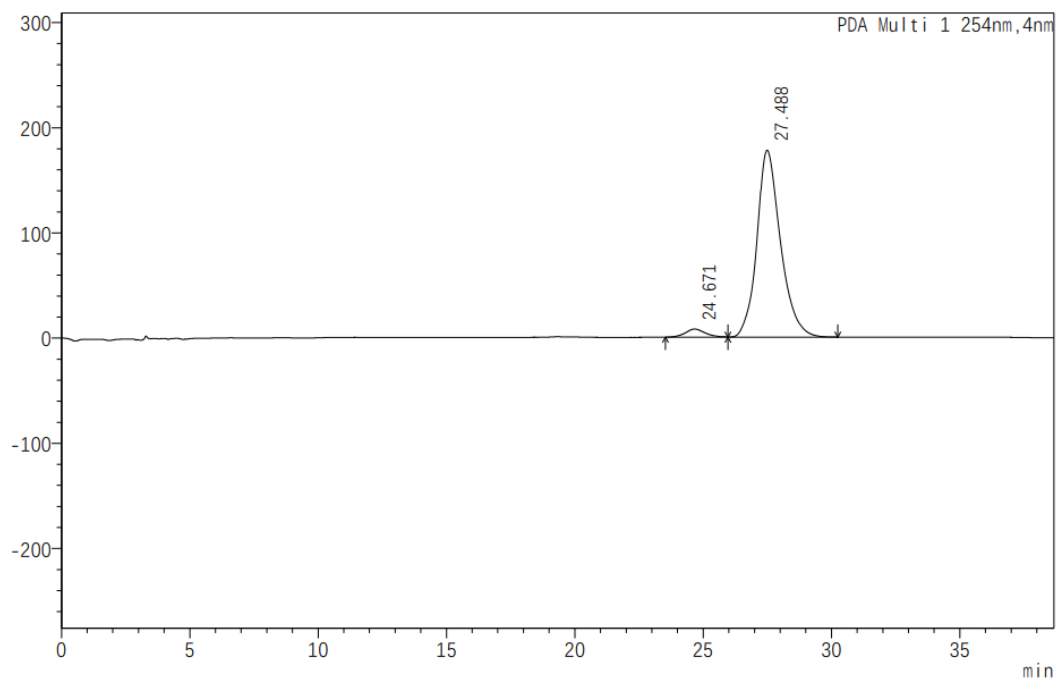

| NO. | Ret.Time | Area(uAU*min) | Height(uAU) | Rel.Area % | Resolution(USP) |
|-----|----------|---------------|-------------|------------|-----------------|
| 1   | 24.671   | 424078        | 7751        | 3.593      | 1.432           |
| 2   | 27.488   | 11379106      | 177713      | 96.407     | 1.615           |

**(9aR,10R,15aR)-3-fluoro-10-hydroxy-6,10-dimethyl-9a,15a-dihydrodibenzo**

**[4,5:6,7] cyclohepta[1,2-*b*] thiochromen-9(10*H*)-one (3p)**

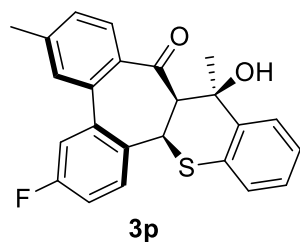

Flash column chromatography on silica gel (hexane/EtOAc, 16:1) gave the product **3p** (32.1 mg, 82% yield) as a white solid.  $[\alpha]_D^{25} = -16$  ( $c = 1.0$  in DCM, 99% ee,  $>20:1$  dr).  $^1\text{H NMR}$  (500 MHz,  $\text{CDCl}_3$ )  $\delta$  7.68 (d,  $J = 7.8$  Hz, 1H), 7.36 (t,  $J = 6.0$  Hz, 1H), 7.16 (d,  $J = 12.7$  Hz, 2H), 7.06 (dt,  $J = 16.4, 7.8$  Hz, 2H), 6.92 (t,  $J = 7.4$  Hz, 1H), 6.83 (d,  $J = 7.7$  Hz, 1H), 6.56 (d,  $J = 7.4$  Hz, 1H), 6.40 (d,  $J = 7.6$  Hz, 1H), 5.03 (s, 1H), 4.86 (s, 1H), 3.39 (s, 1H), 2.40 (s, 3H), 1.69 (s, 3H).  $^{13}\text{C NMR}$  (126 MHz,  $\text{CDCl}_3$ )  $\delta$  208.45, 163.38 (d,  $J = 249.5$  Hz), 143.37, 141.64 (d,  $J = 8.8$  Hz), 139.94, 137.62, 136.67, 134.71, 132.14, 131.59 (d,  $J = 8.8$  Hz), 129.00, 128.63, 128.58, 127.23, 125.15, 125.04, 124.93, 118.21 (d,  $J = 23.9$  Hz), 115.14 (d,  $J = 21.4$  Hz), 75.19, 64.02, 43.95, 27.23, 21.77.  $^{19}\text{F NMR}$  (377 MHz,  $\text{CDCl}_3$ )  $\delta$  -87.56. HRMS (ESI)  $m/z$  calcd for  $\text{C}_{24}\text{H}_{20}\text{FO}_2\text{S}^+$  ( $\text{M}+\text{H}$ ) $^+$  391.1163, found 391.1170. The ee of compound **3p** was determined by HPLC using an AD-H column (0.46 cm x 25 cm), *n*-hexane/*i*-PrOH = 80/20, flow rate = 1.0 mL/min,  $\lambda = 254$  nm,  $t(\text{major}) = 5.055$  min,  $t(\text{minor}) = 6.324$  min.

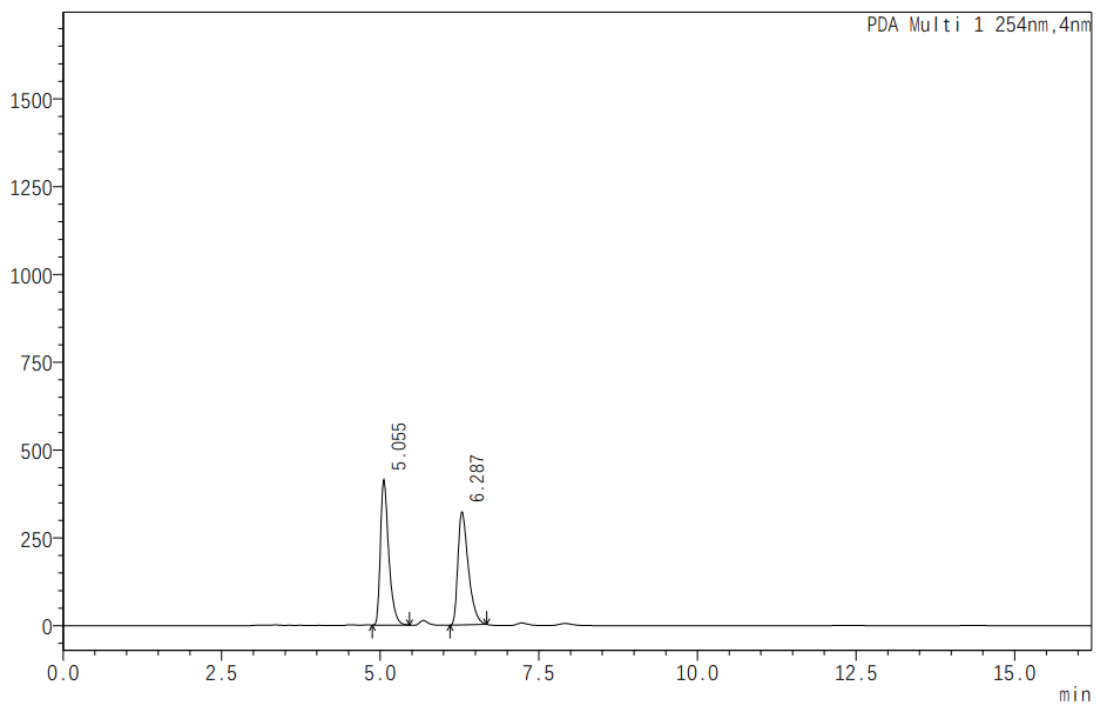

PDA Ch1 254nm

| NO. | Ret.Time | Area(uAU*min) | Height(uAU) | Rel.Area % | Resolution(USP) |
|-----|----------|---------------|-------------|------------|-----------------|
| 1   | 5.055    | 3770823       | 414057      | 50.523     | 0.250           |
| 2   | 6.287    | 3692814       | 321712      | 49.477     | 0.310           |

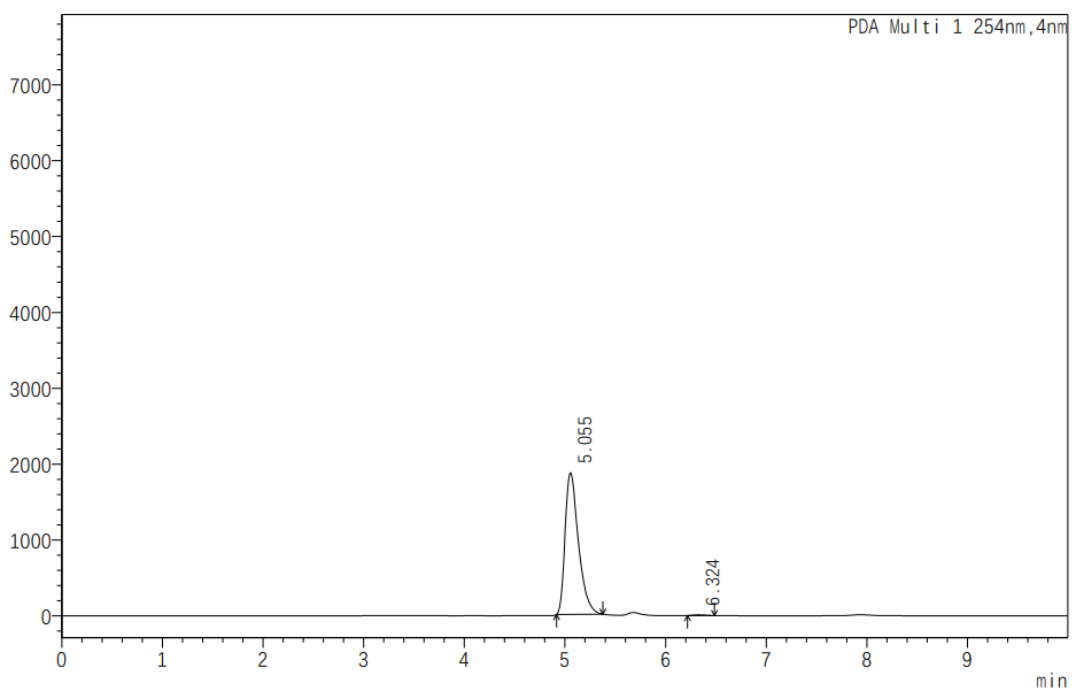

PDA Ch1 254nm

| NO. | Ret.Time | Area(uAU*min) | Height(uAU) | Rel.Area % | Resolution(USP) |
|-----|----------|---------------|-------------|------------|-----------------|
| 1   | 5.055    | 17218544      | 1867977     | 99.567     | 0.253           |
| 2   | 6.324    | 74807         | 8743        | 0.433      | 0.245           |

**(9aR,10R,15aR)-12-fluoro-10-hydroxy-10-methyl-9a,15a-dihydrodibenzo [4,5:6,7]**

**cyclohepta[1,2-*b*] thiochromen-9(10*H*)-one (3q)**

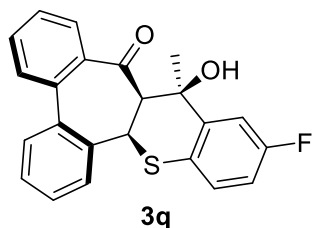

Flash column chromatography on silica gel (hexane/EtOAc, 16:1) gave the product **3q** (33.5 mg, 89% yield) as a white solid.  $[\alpha]_D^{25} = 72$  ( $c = 1.0$  in DCM, 99% ee, >20:1 dr).  $^1\text{H NMR}$  (500 MHz,  $\text{CDCl}_3$ )  $\delta$  7.63 – 7.41 (m, 4H), 7.37 (m, 3H), 7.02 (t,  $J = 7.1$  Hz, 1H), 6.65 (t,  $J = 8.3$  Hz, 1H), 6.54 (d,  $J = 7.5$  Hz, 1H), 6.53 – 6.47 (m, 1H), 5.02 (d,  $J = 4.3$  Hz, 1H), 4.82 (s, 1H), 3.46 (d,  $J = 4.4$  Hz, 1H), 1.70 (s, 3H).  $^{13}\text{C NMR}$  (126 MHz,  $\text{CDCl}_3$ )  $\delta$  208.78, 160.96 (d,  $J = 244.4$  Hz), 142.29, 142.24, 139.22, 139.00, 138.95, 135.99, 132.72, 131.52, 129.83, 129.82, 128.77, 128.19 (d,  $J = 11.3$  Hz), 127.71, 126.63, 126.57, 114.51 (d,  $J = 22.7$  Hz), 112.50 (d,  $J = 23.9$  Hz), 74.97, 64.05, 44.48, 26.76.  $^{19}\text{F NMR}$  (377 MHz,  $\text{CDCl}_3$ )  $\delta$  -82.90. HRMS (ESI)  $m/z$  calcd for  $\text{C}_{23}\text{H}_{18}\text{FO}_2\text{S}^+$  ( $\text{M}+\text{H}$ ) $^+$  377.1006, found 377.1003. The ee of compound **3q** was determined by HPLC using an AD-H column (0.46 cm x 25 cm), *n*-hexane/*i*-PrOH = 80/20, flow rate = 1.0 mL/min,  $\lambda = 254$  nm,  $t(\text{major}) = 6.473$  min,  $t(\text{minor}) = 8.273$  min.

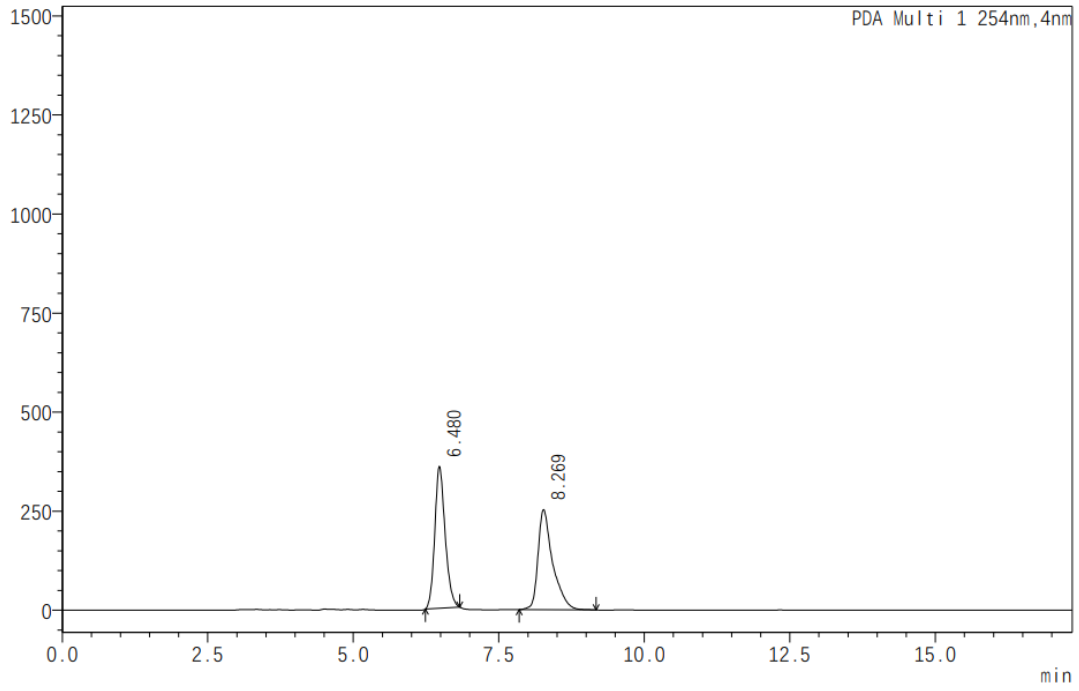

PDA Ch1 254nm

| NO. | Ret.Time | Area(uAU*min) | Height(uAU) | Rel.Area % | Resolution(USP) |
|-----|----------|---------------|-------------|------------|-----------------|
| 1   | 6.480    | 4438611       | 357846      | 49.912     | 0.334           |
| 2   | 8.269    | 4454303       | 253184      | 50.088     | 0.428           |

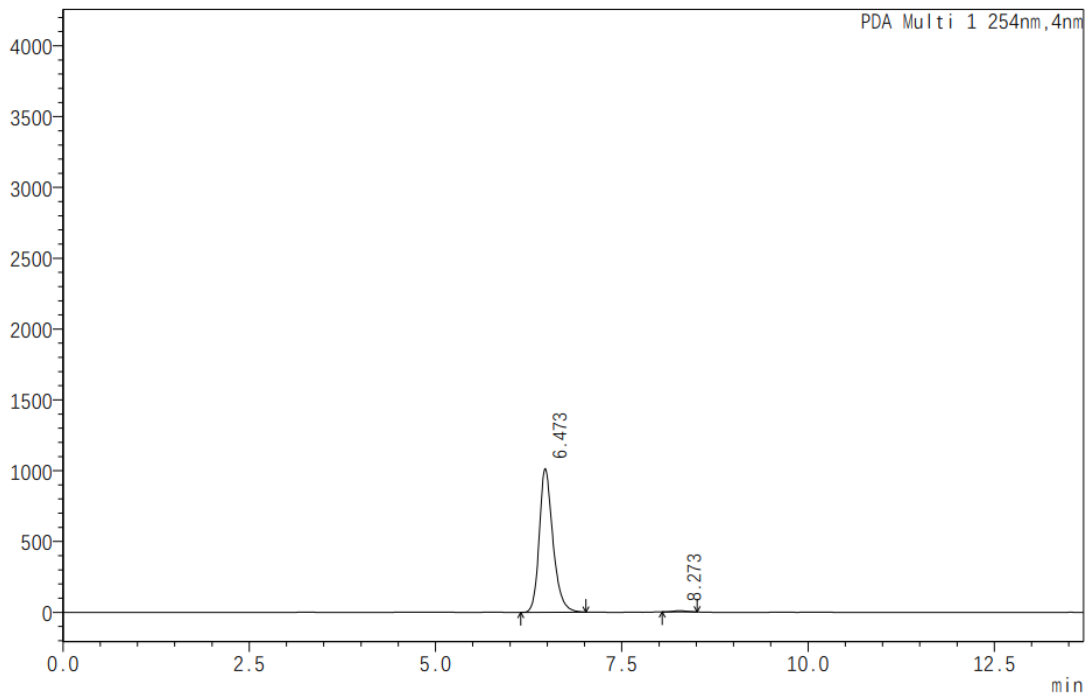

PDA Ch1 254nm

| NO. | Ret.Time | Area(uAU*min) | Height(uAU) | Rel.Area % | Resolution(USP) |
|-----|----------|---------------|-------------|------------|-----------------|
| 1   | 6.473    | 12911374      | 1012675     | 99.264     | 0.338           |
| 2   | 8.273    | 95741         | 8036        | 0.736      | 0.333           |

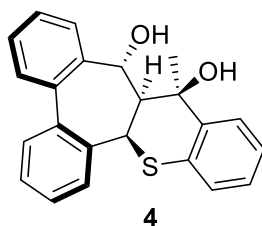

Flash column chromatography on silica gel (hexane/EtOAc, 4:1) gave the product **4** (31.0 mg, 86% yield) as a white solid.  $[\alpha]_D^{25} = 79$  ( $c = 1.0$  in DCM, 99% ee, >20:1 dr).  $^1\text{H NMR}$  (500 MHz,  $\text{CDCl}_3$ )  $\delta$  7.74 (d,  $J = 7.7$  Hz, 1H), 7.41 (t,  $J = 7.4$  Hz, 1H), 7.37 – 7.30 (m, 2H), 7.28 (d,  $J = 9.2$  Hz, 2H), 7.16 (t,  $J = 7.4$  Hz, 1H), 7.07 (t,  $J = 7.5$  Hz, 1H), 6.81 (t,  $J = 7.4$  Hz, 1H), 6.74 (t,  $J = 7.4$  Hz, 1H), 6.50 (d,  $J = 7.6$  Hz, 1H), 6.34 (d,  $J = 7.6$  Hz, 1H), 5.74 (s, 1H), 5.05 (d,  $J = 7.1$  Hz, 1H), 4.75 (d,  $J = 7.7$  Hz, 1H), 3.60 (s, 1H), 3.37 (t,  $J = 7.2$  Hz, 1H), 1.64 (s, 3H).  $^{13}\text{C NMR}$  (126 MHz,  $\text{CDCl}_3$ )  $\delta$  140.12, 139.92, 138.52, 138.00, 137.78, 135.49, 129.87, 129.05, 128.68, 127.92, 126.93, 126.77, 126.00, 125.17, 124.54, 124.20, 123.74, 75.60, 73.29, 56.06, 46.44, 28.08. HRMS (ESI)  $m/z$  calcd for  $\text{C}_{23}\text{H}_{21}\text{O}_2\text{S}^+$  ( $\text{M}+\text{H}$ ) $^+$  361.1257, found 361.1264. The ee of compound **4** was determined by HPLC using an AD-H column (0.46 cm x 25 cm), *n*-hexane/*i*-PrOH = 80/20, flow rate = 1.0 mL/min,  $\lambda = 254$  nm,  $t(\text{major}) = 12.965$  min,  $t(\text{minor}) = 5.535$  min.



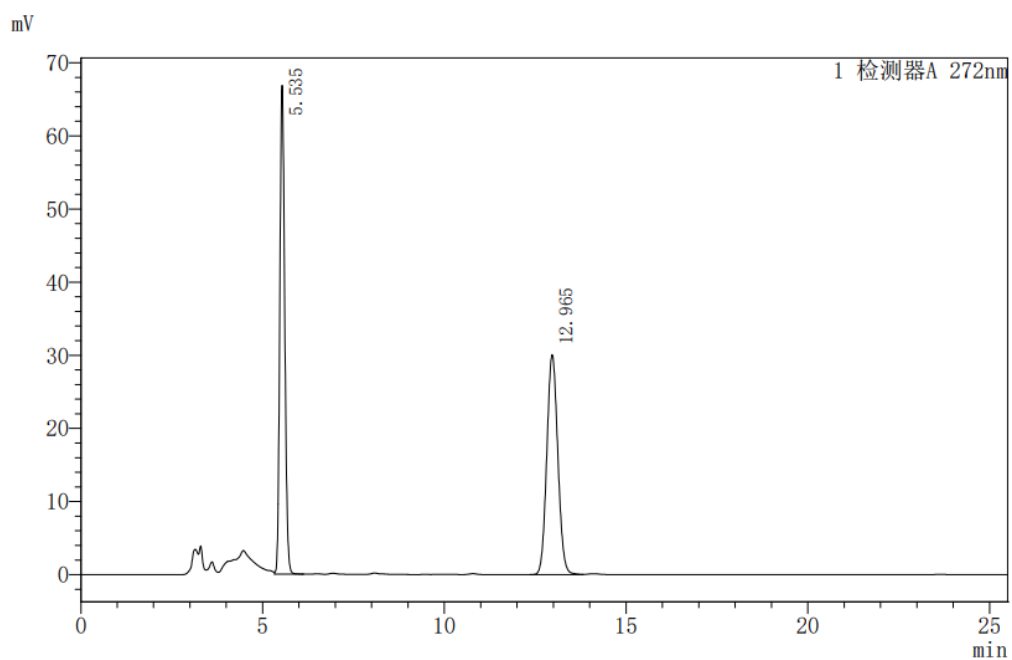

| NO. | Ret. Time | Height (uAU) | Area (uAU*min) | Rel. Area % | Resolution (USP) |
|-----|-----------|--------------|----------------|-------------|------------------|
| 1   | 5.535     | 66863        | 631443         | 49.891      | --               |
| 2   | 12.965    | 30080        | 634203         | 50.109      | 18.179           |

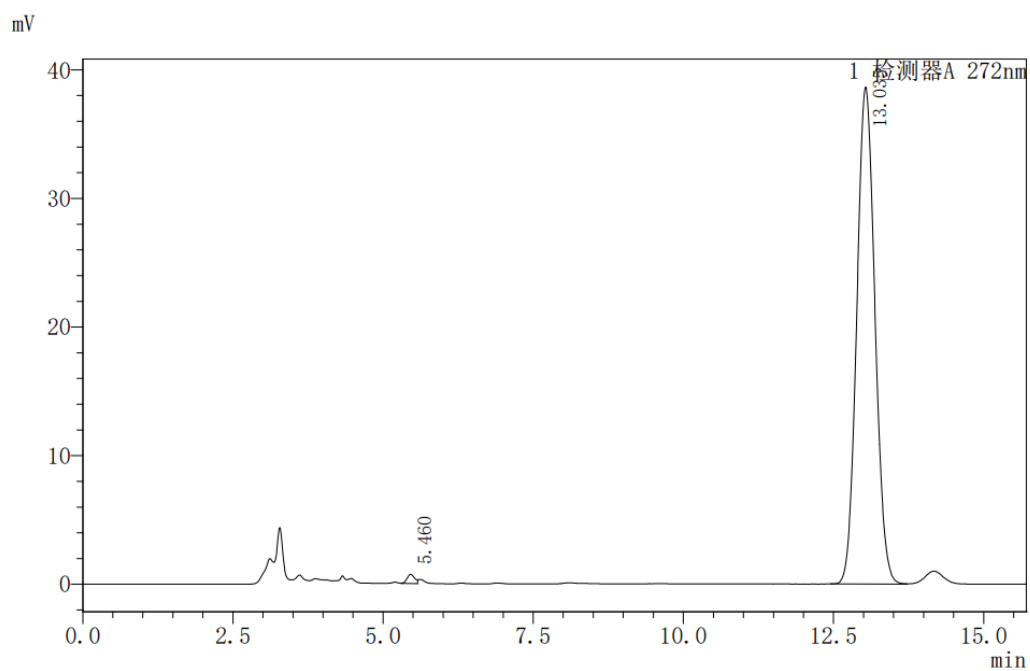

| NO. | Ret. Time | Height (uAU) | Area (uAU*min) | Rel. Area % | Resolution (USP) |
|-----|-----------|--------------|----------------|-------------|------------------|
| 1   | 5.460     | 716          | 6301           | 0.770       | --               |
| 2   | 13.035    | 38660        | 811675         | 99.230      | 18.527           |

## 8. Copies of NMR Spectra and NOE

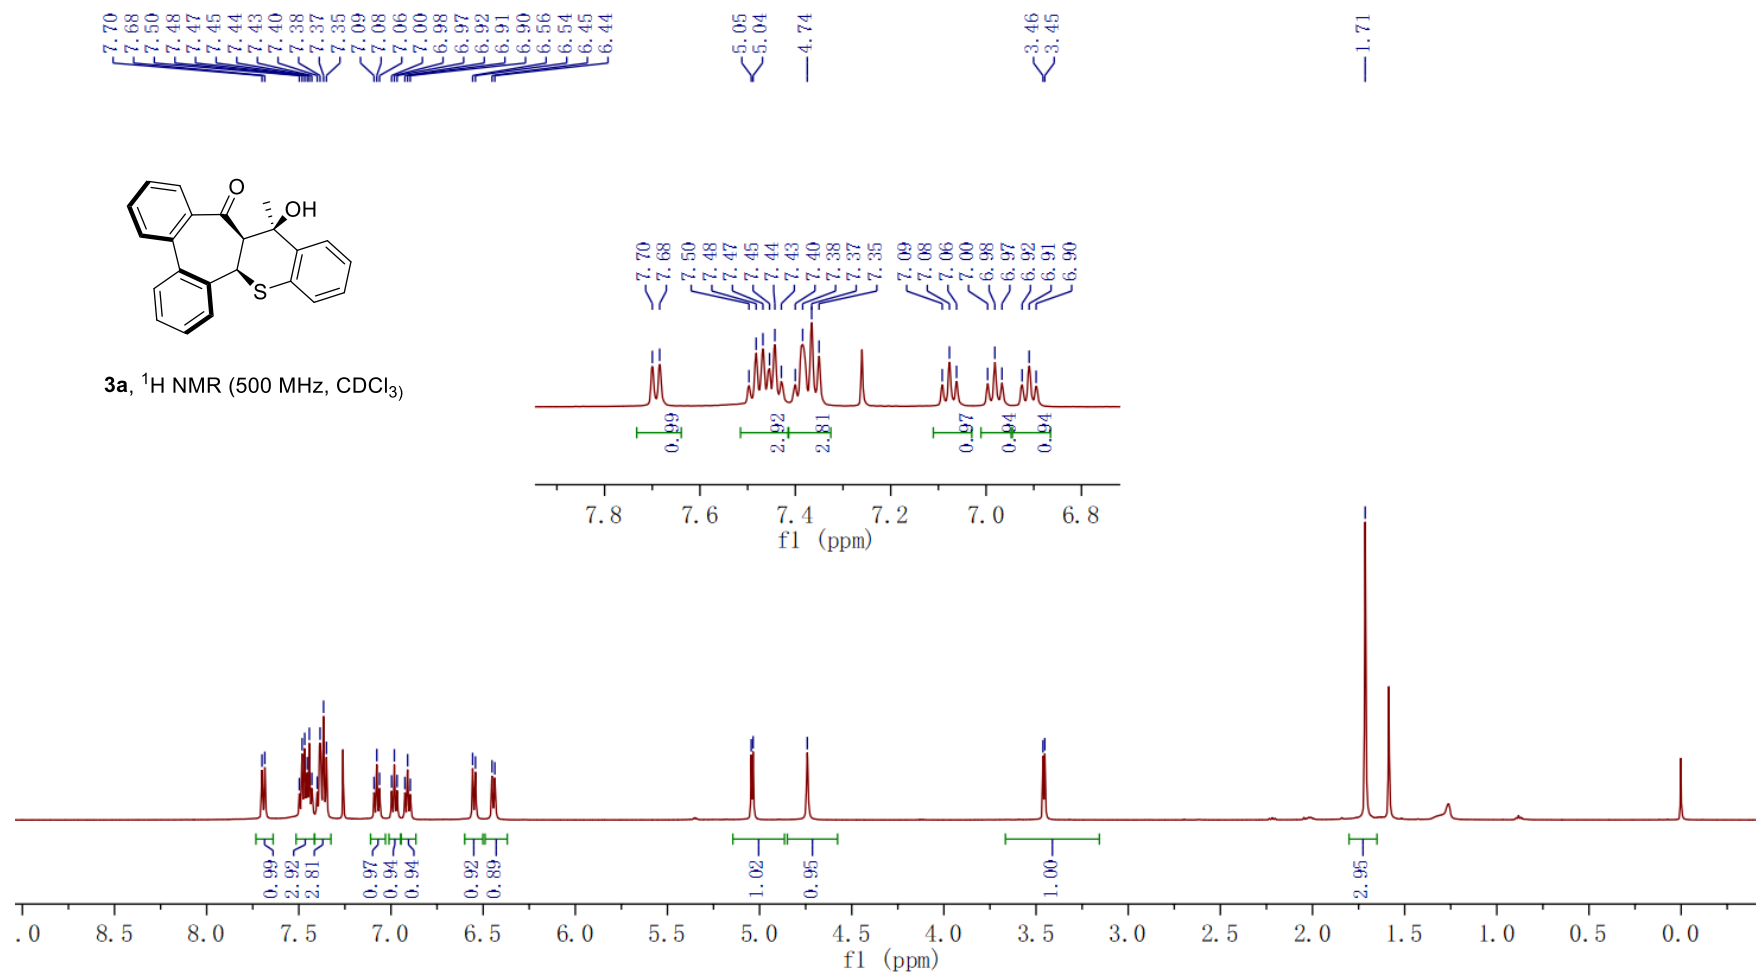

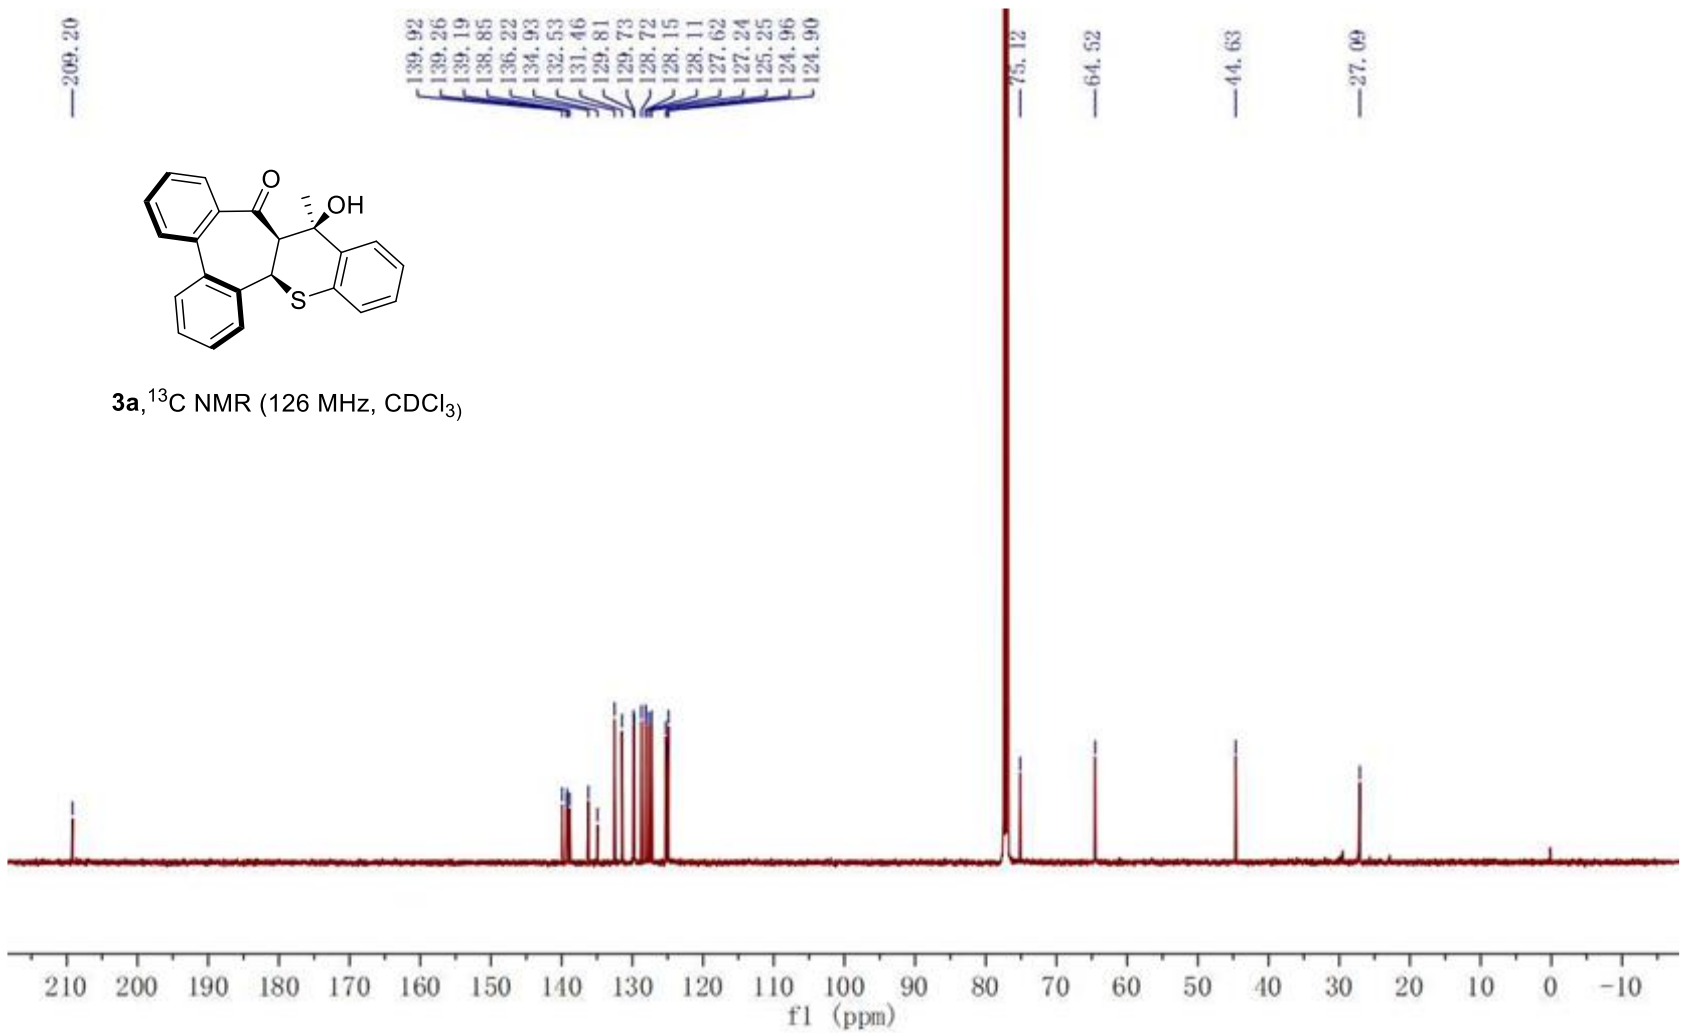

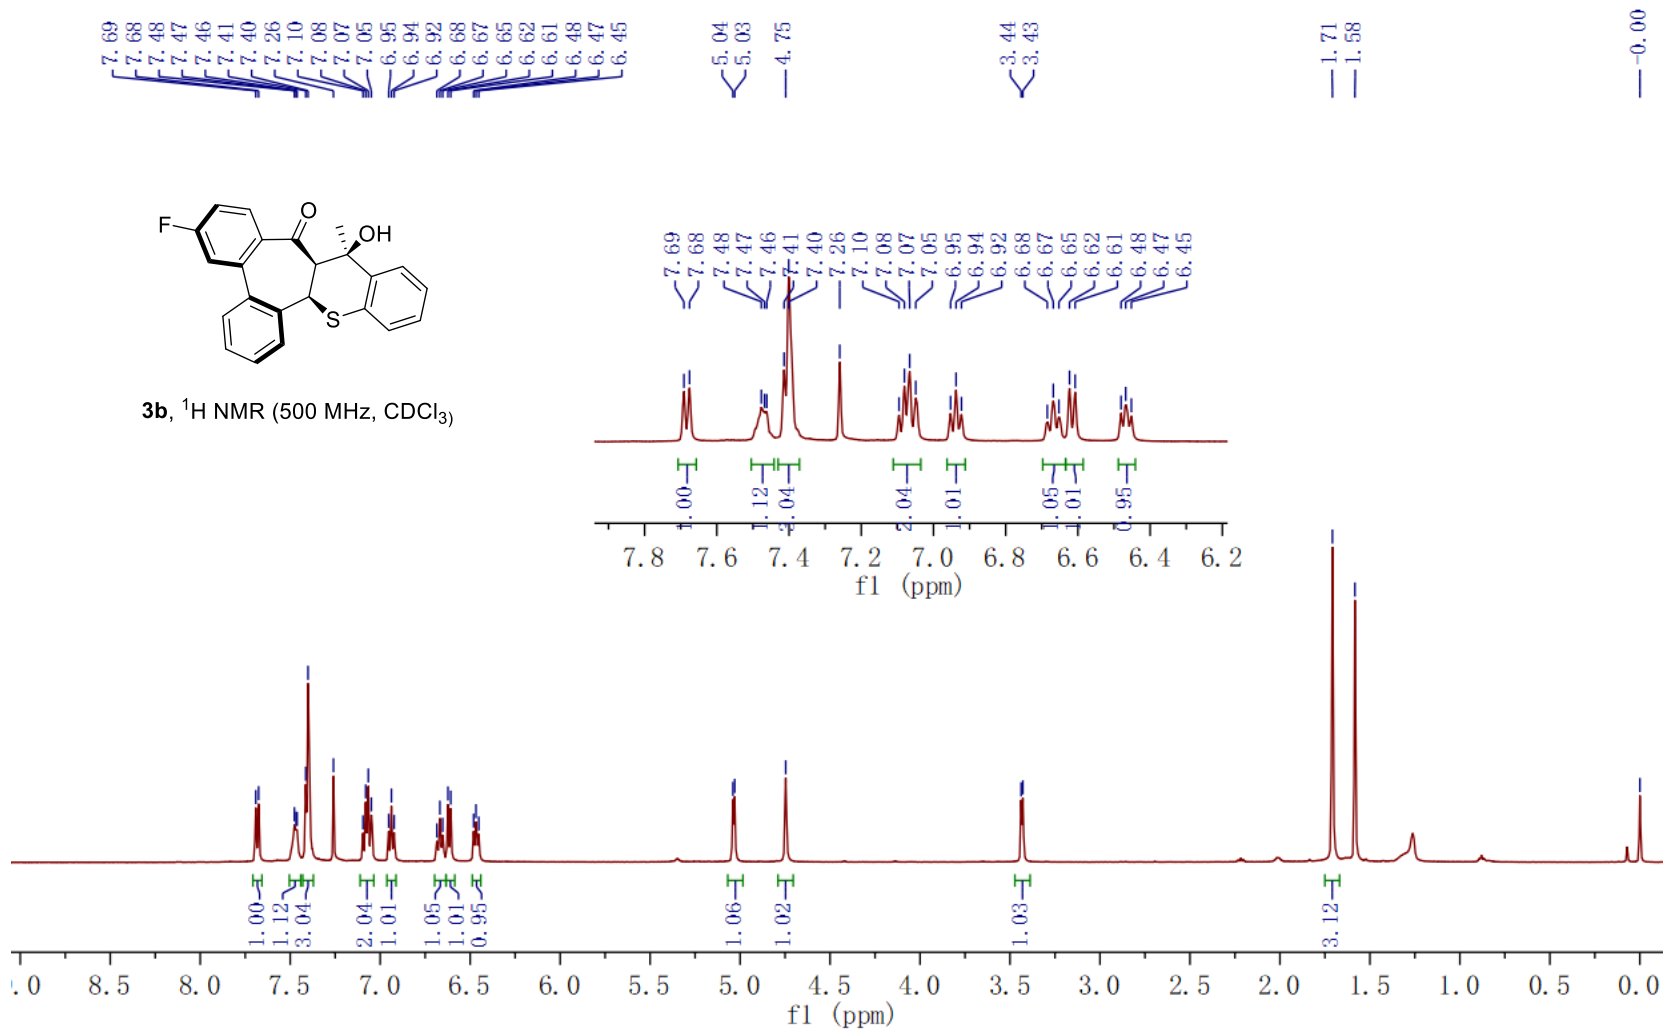

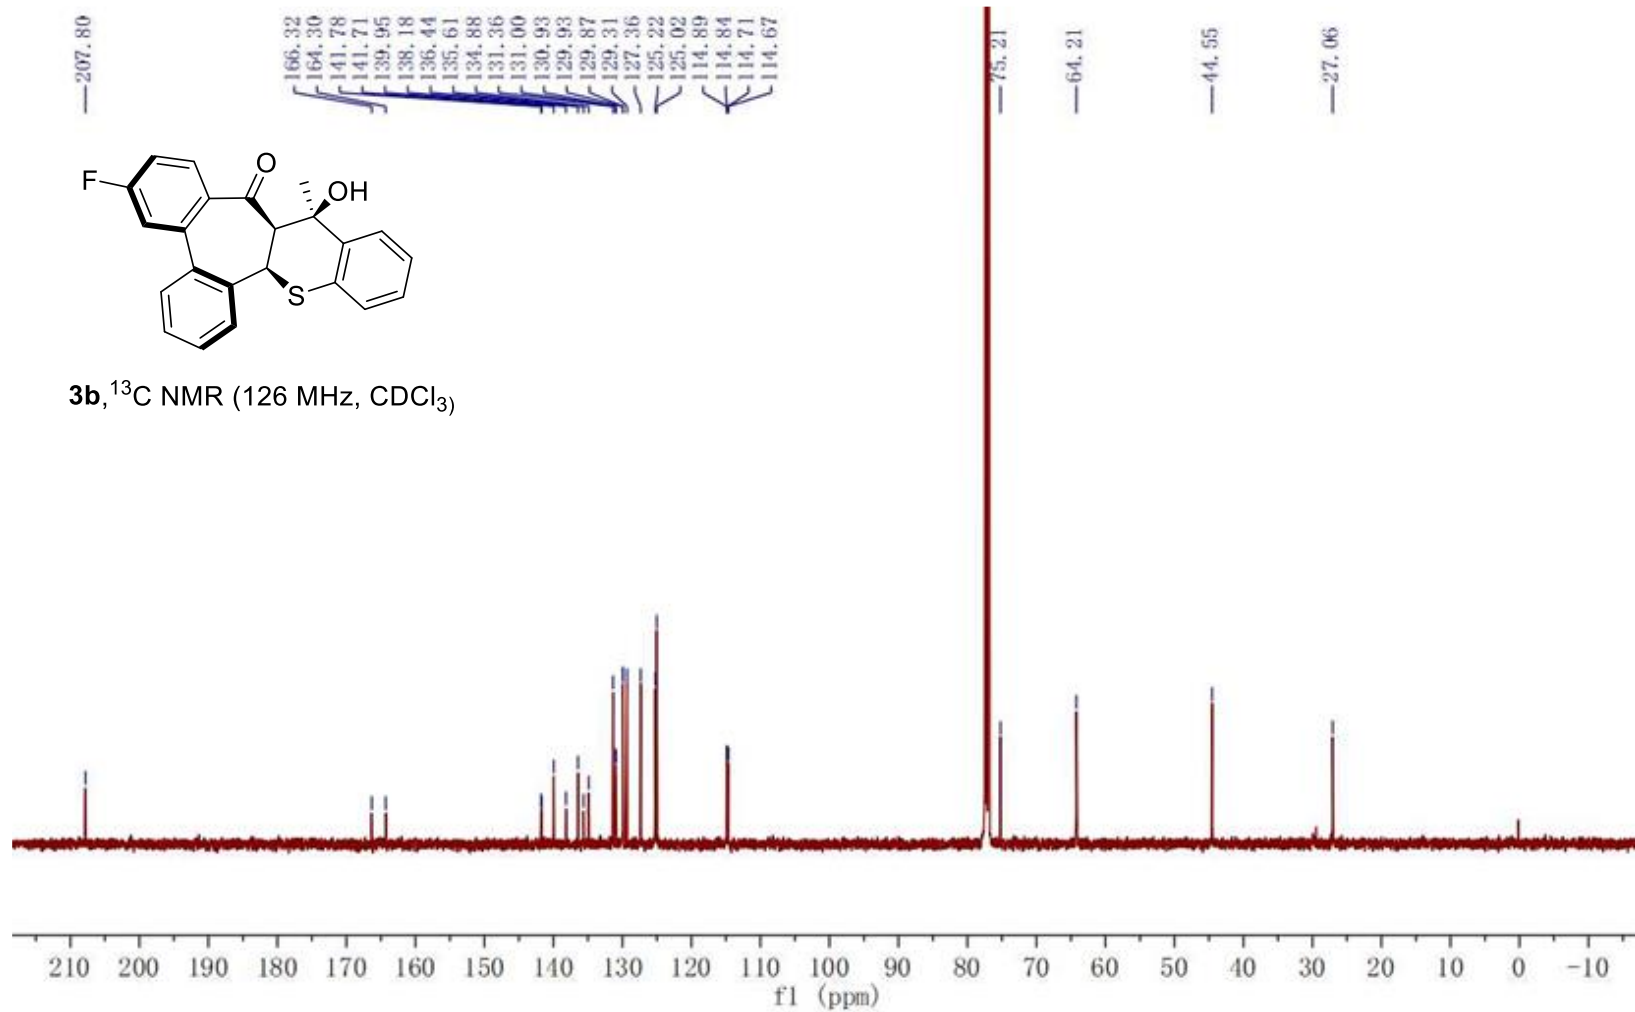

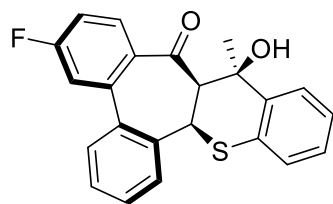

**3b**,  $^{19}\text{F}$  NMR (377 MHz,  $\text{CDCl}_3$ )

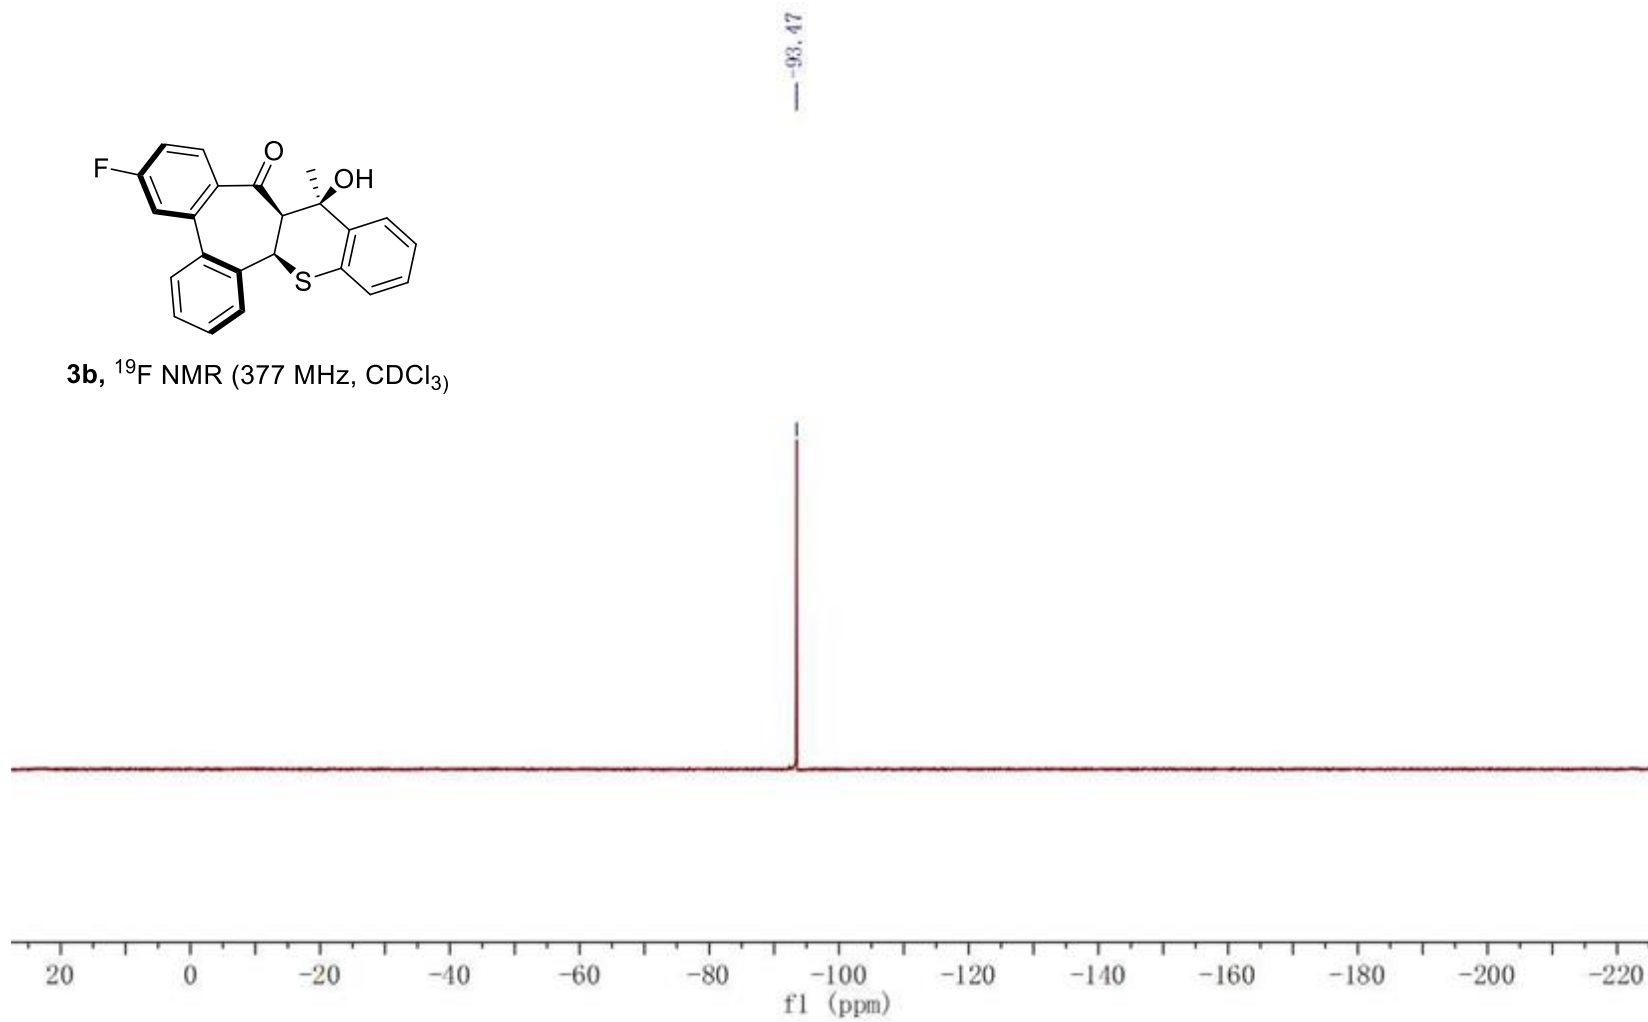

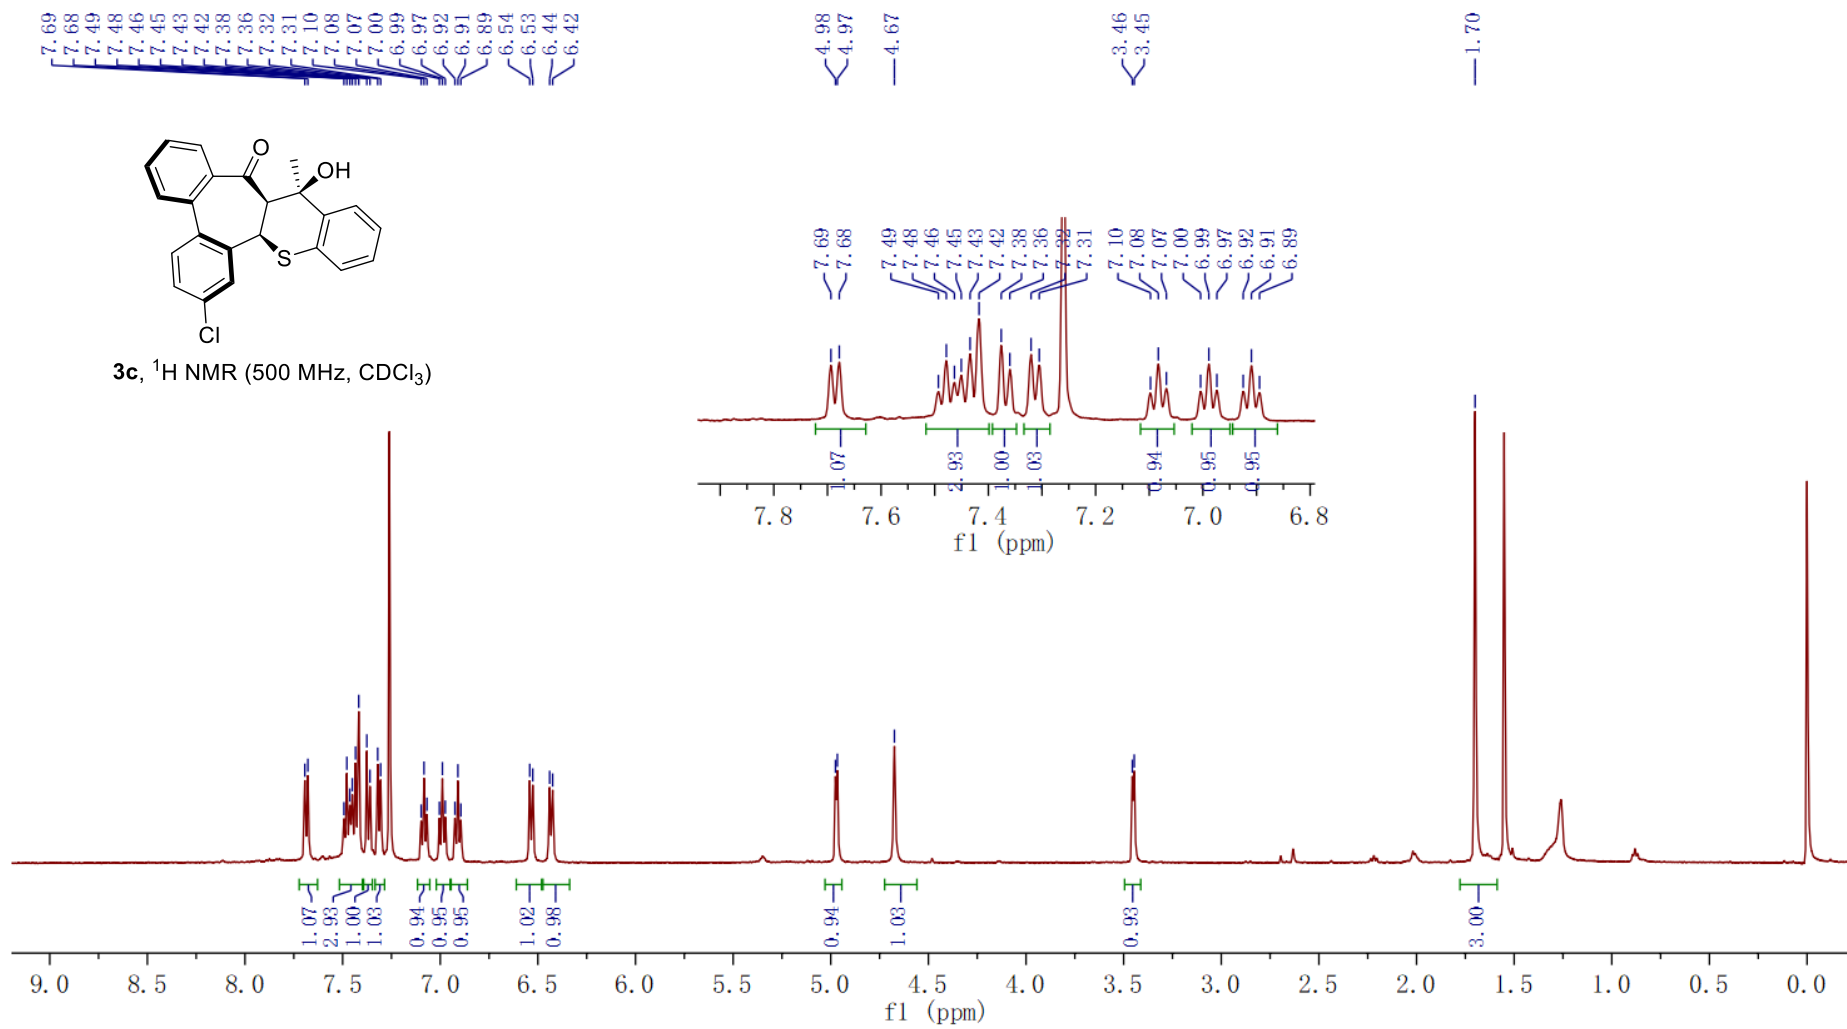

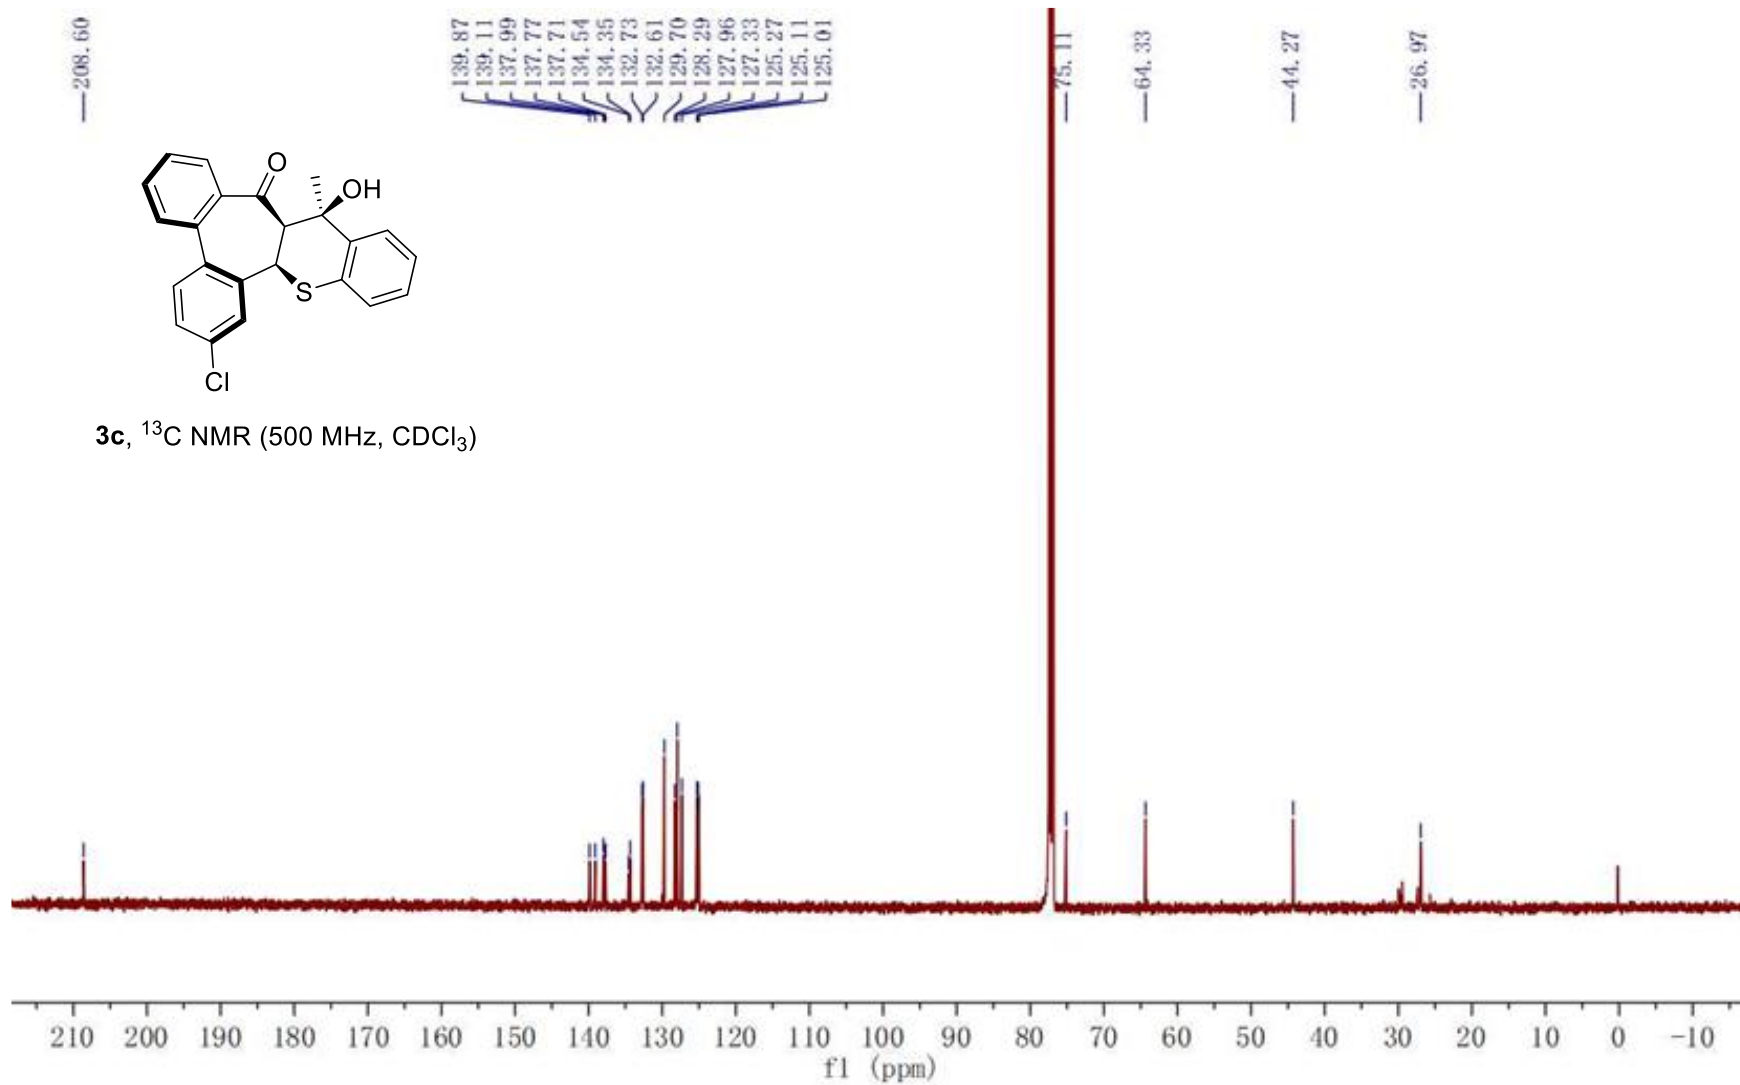



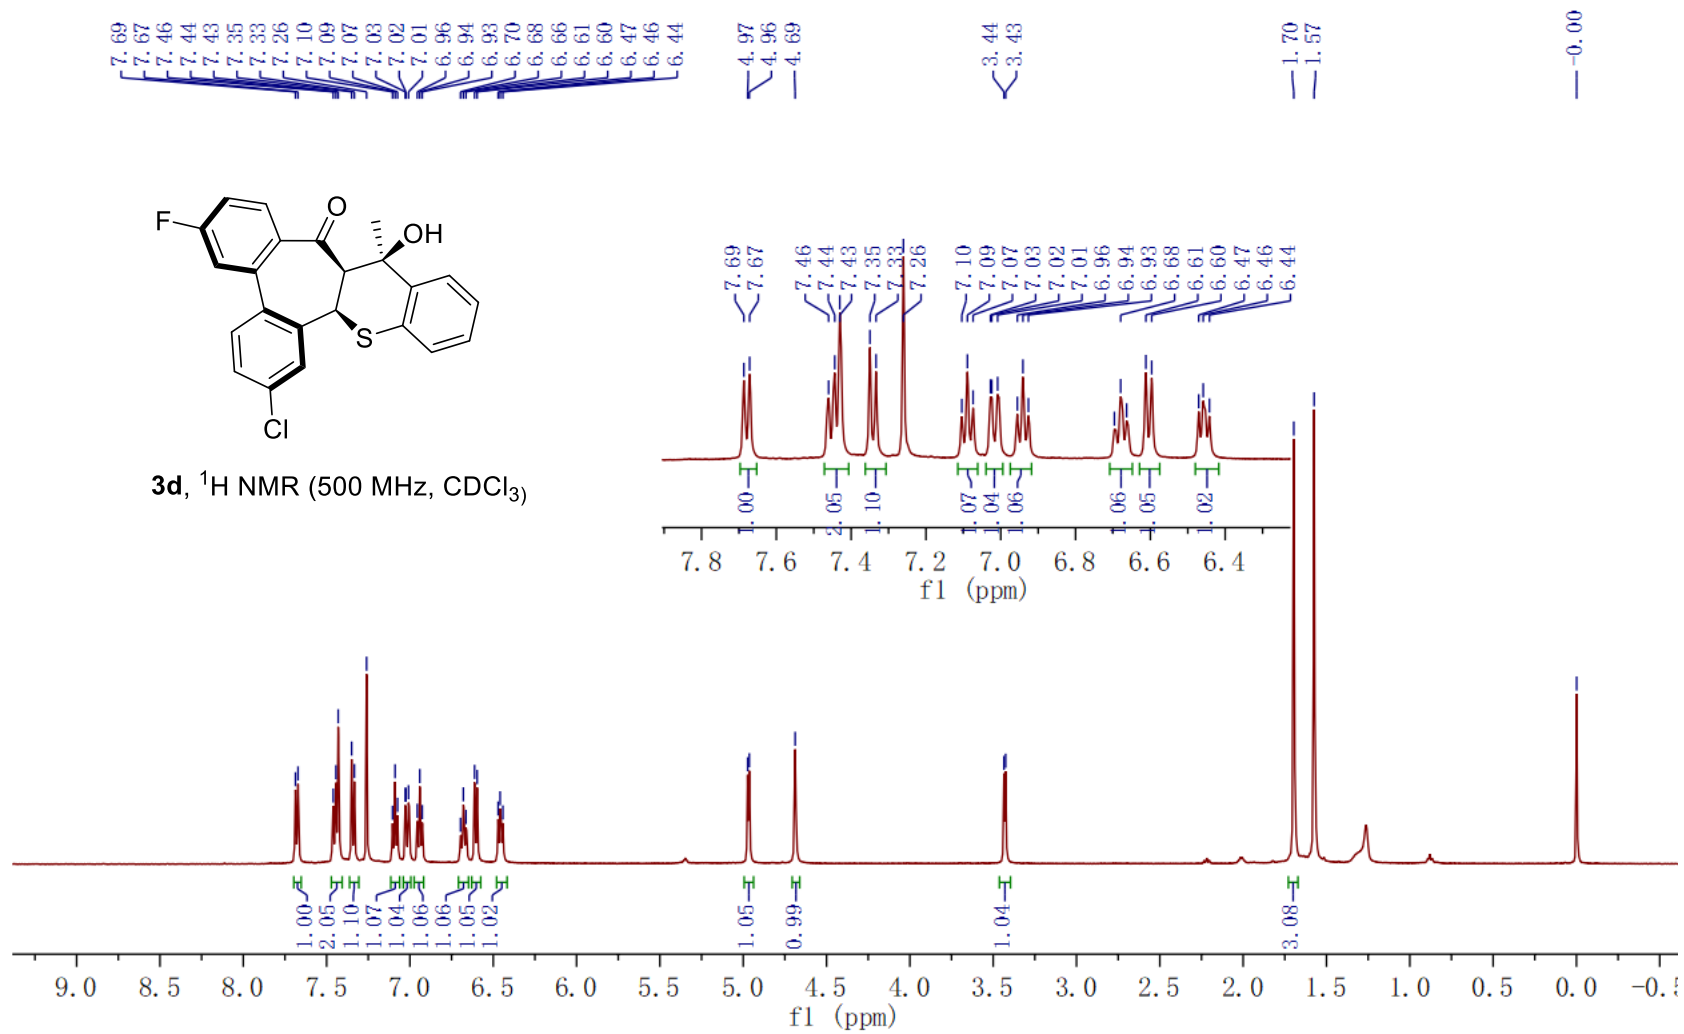

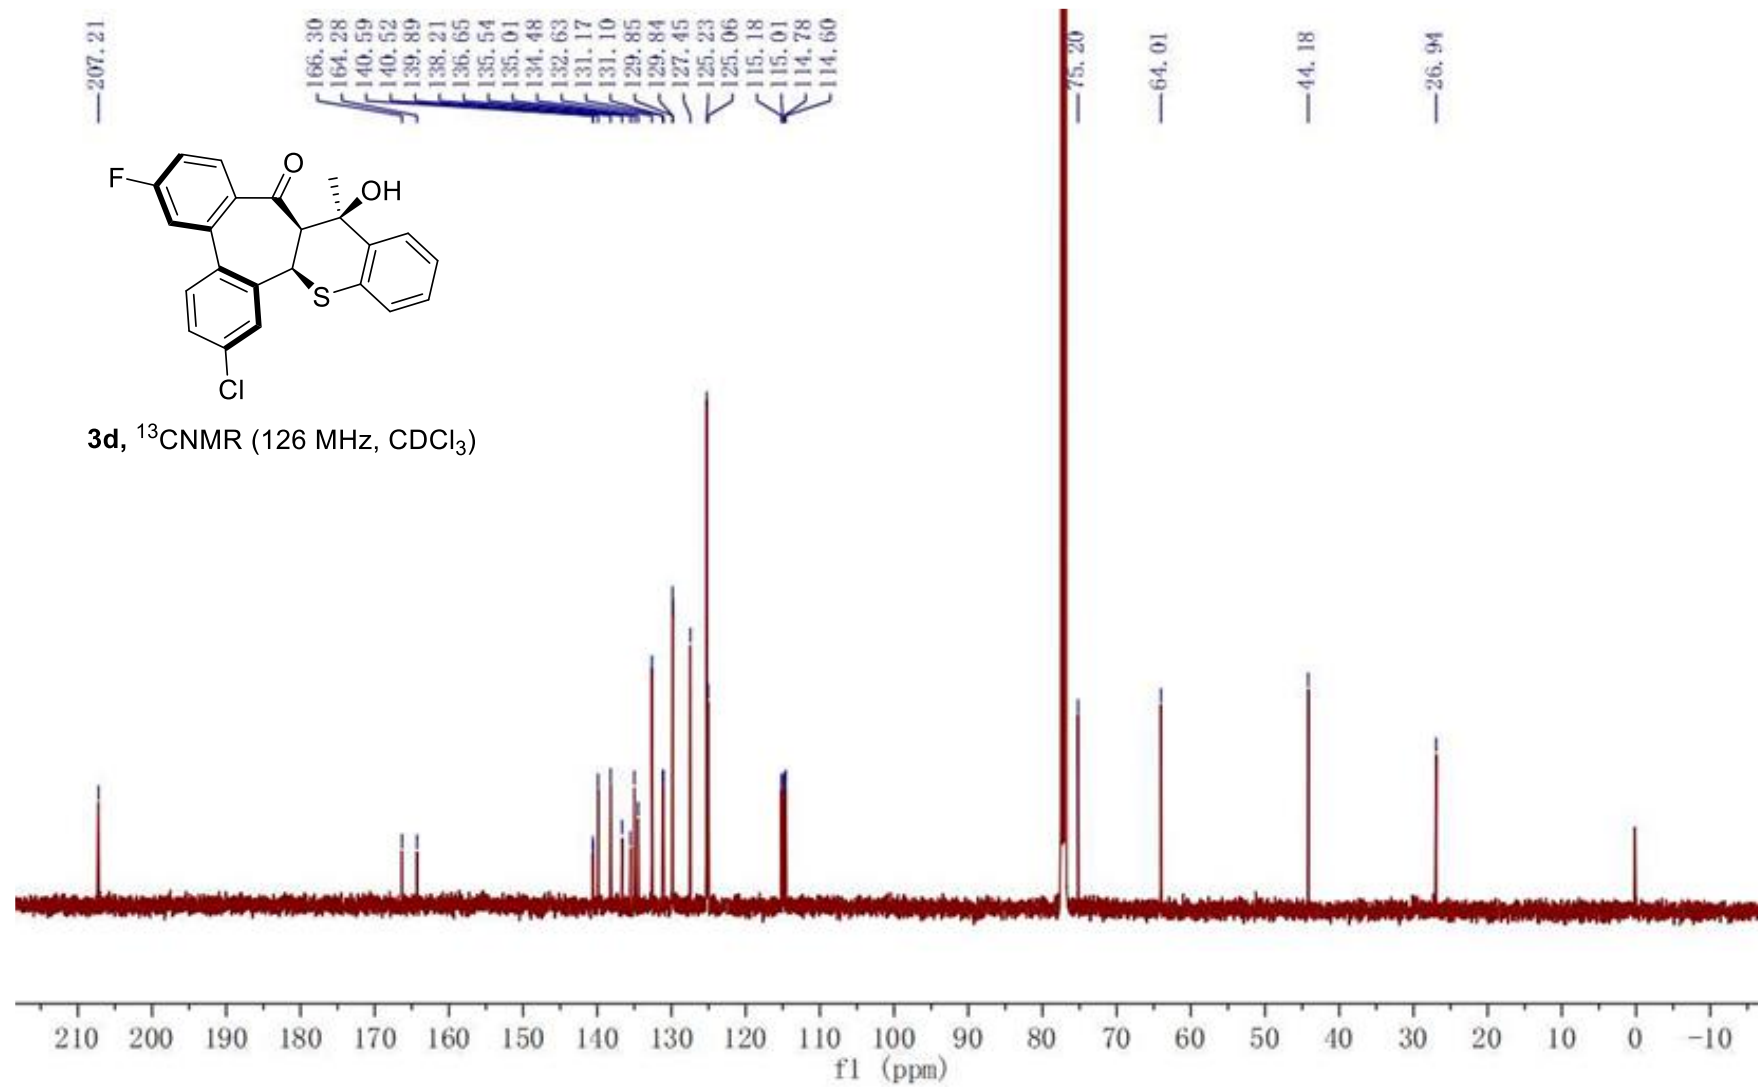

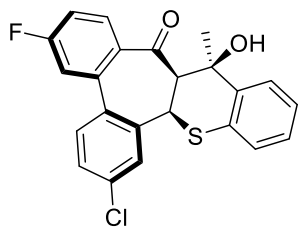

**3d**,  $^{19}\text{F}$  NMR (377 MHz,  $\text{CDCl}_3$ )

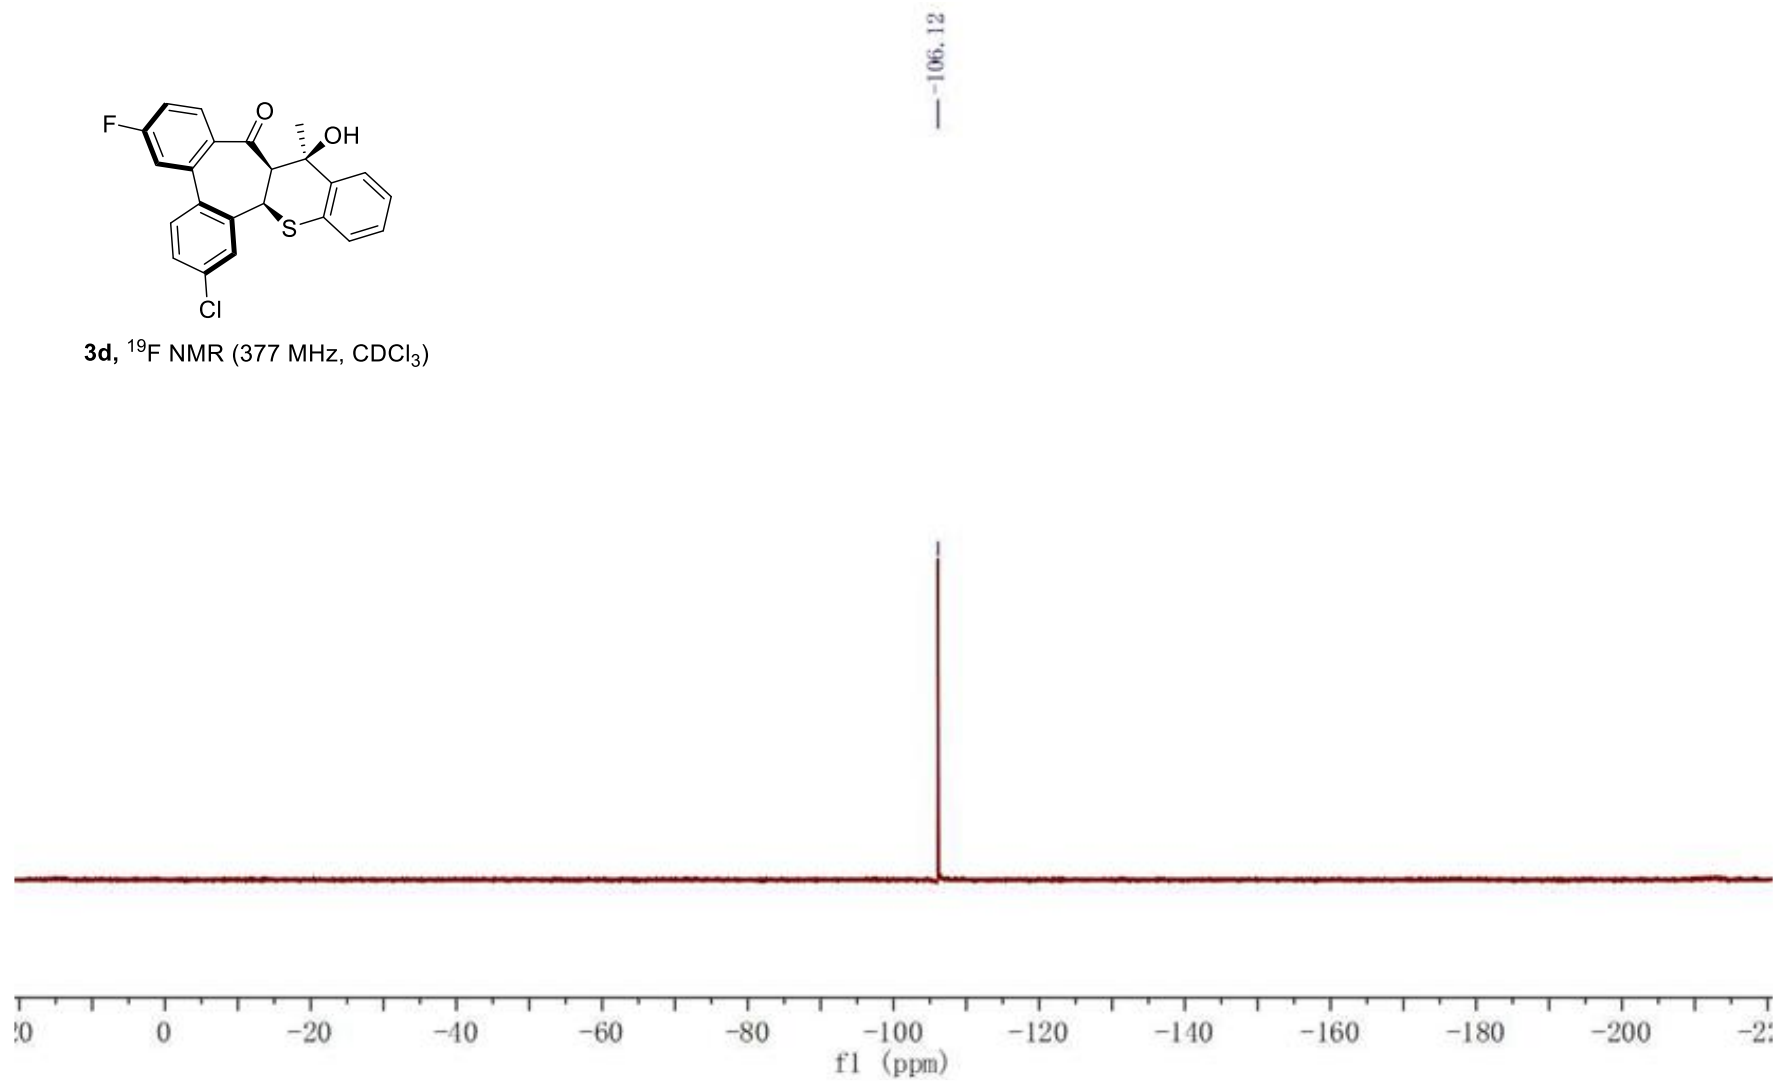

7.69  
7.67  
7.47  
7.47  
7.46  
7.43  
7.41  
7.39  
7.36  
7.10  
7.08  
7.07  
6.96  
6.95  
6.95  
6.83  
6.62  
6.39  
6.38

5.04  
5.03

4.67

3.44  
3.43

1.71

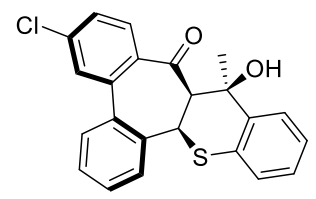

**3e**,  $^1\text{H NMR}$  (500 MHz,  $\text{CDCl}_3$ )

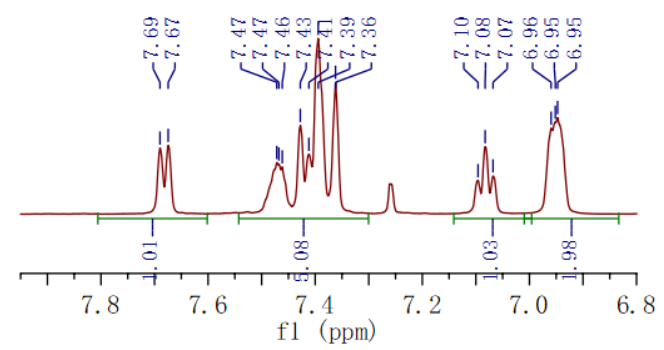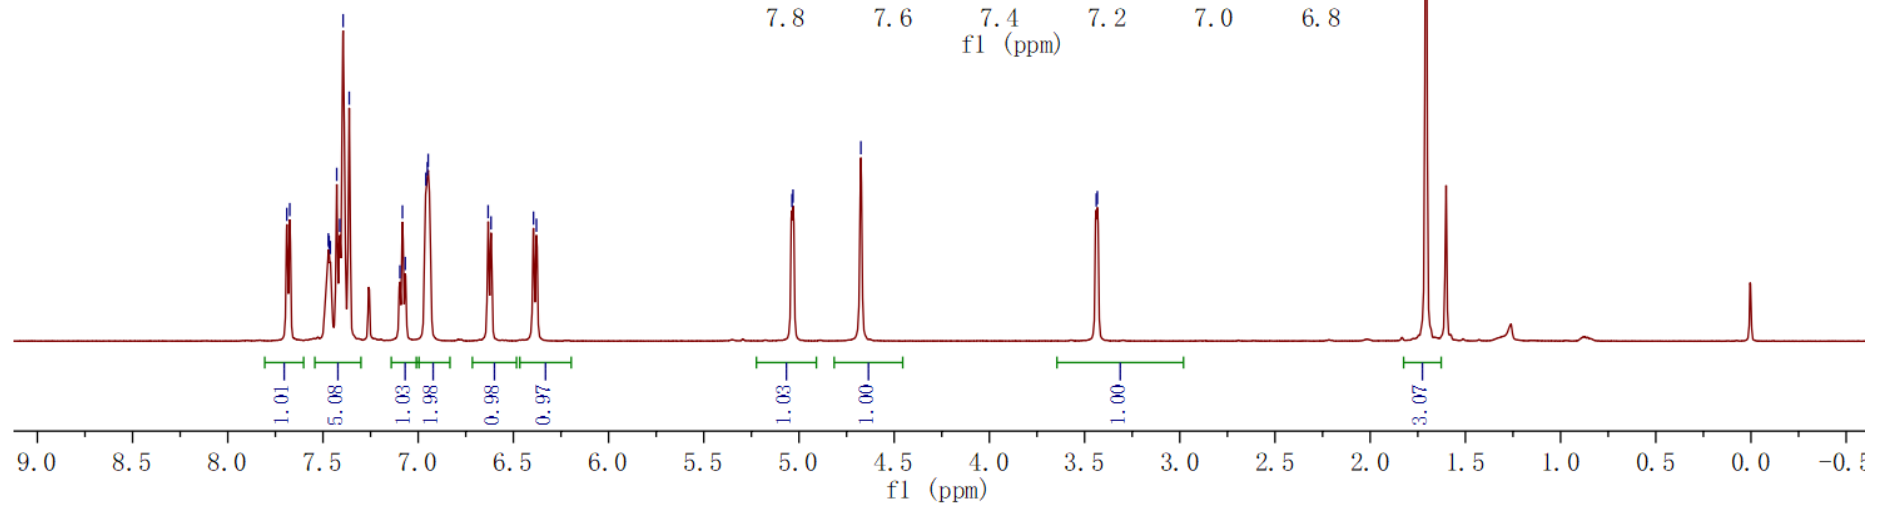

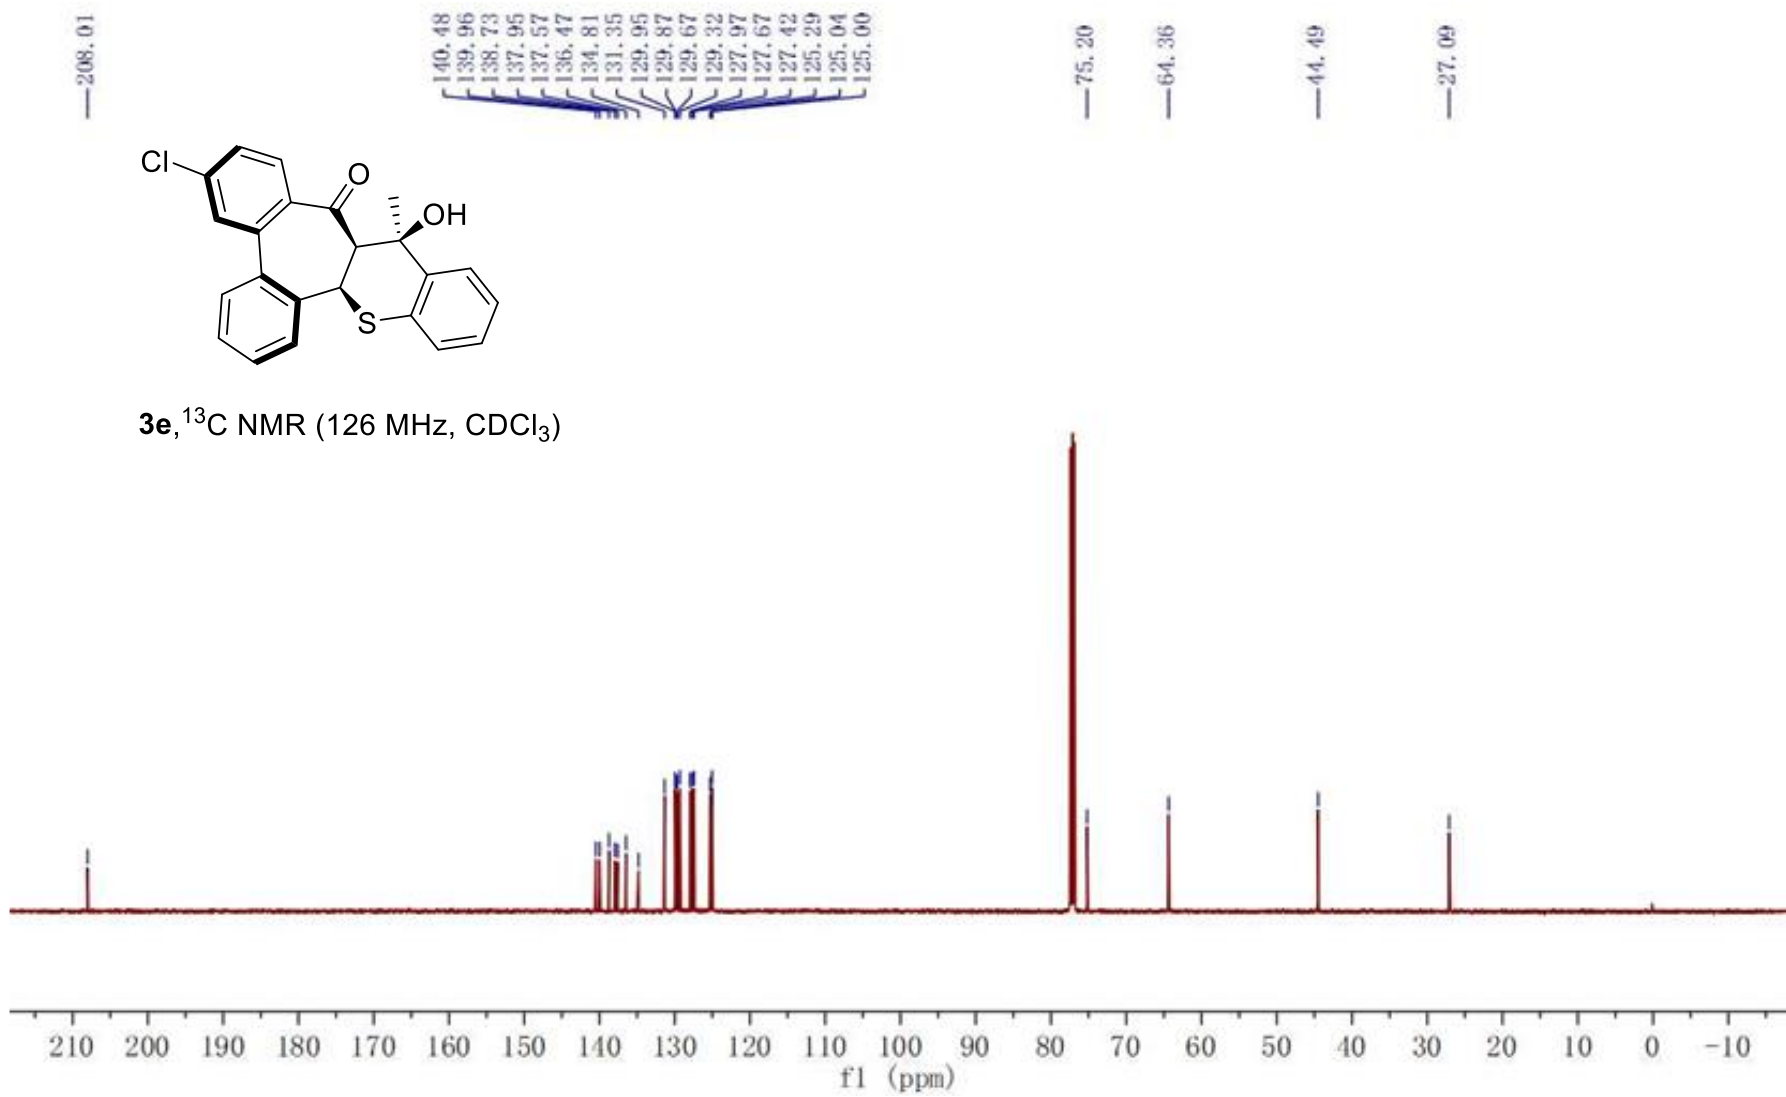

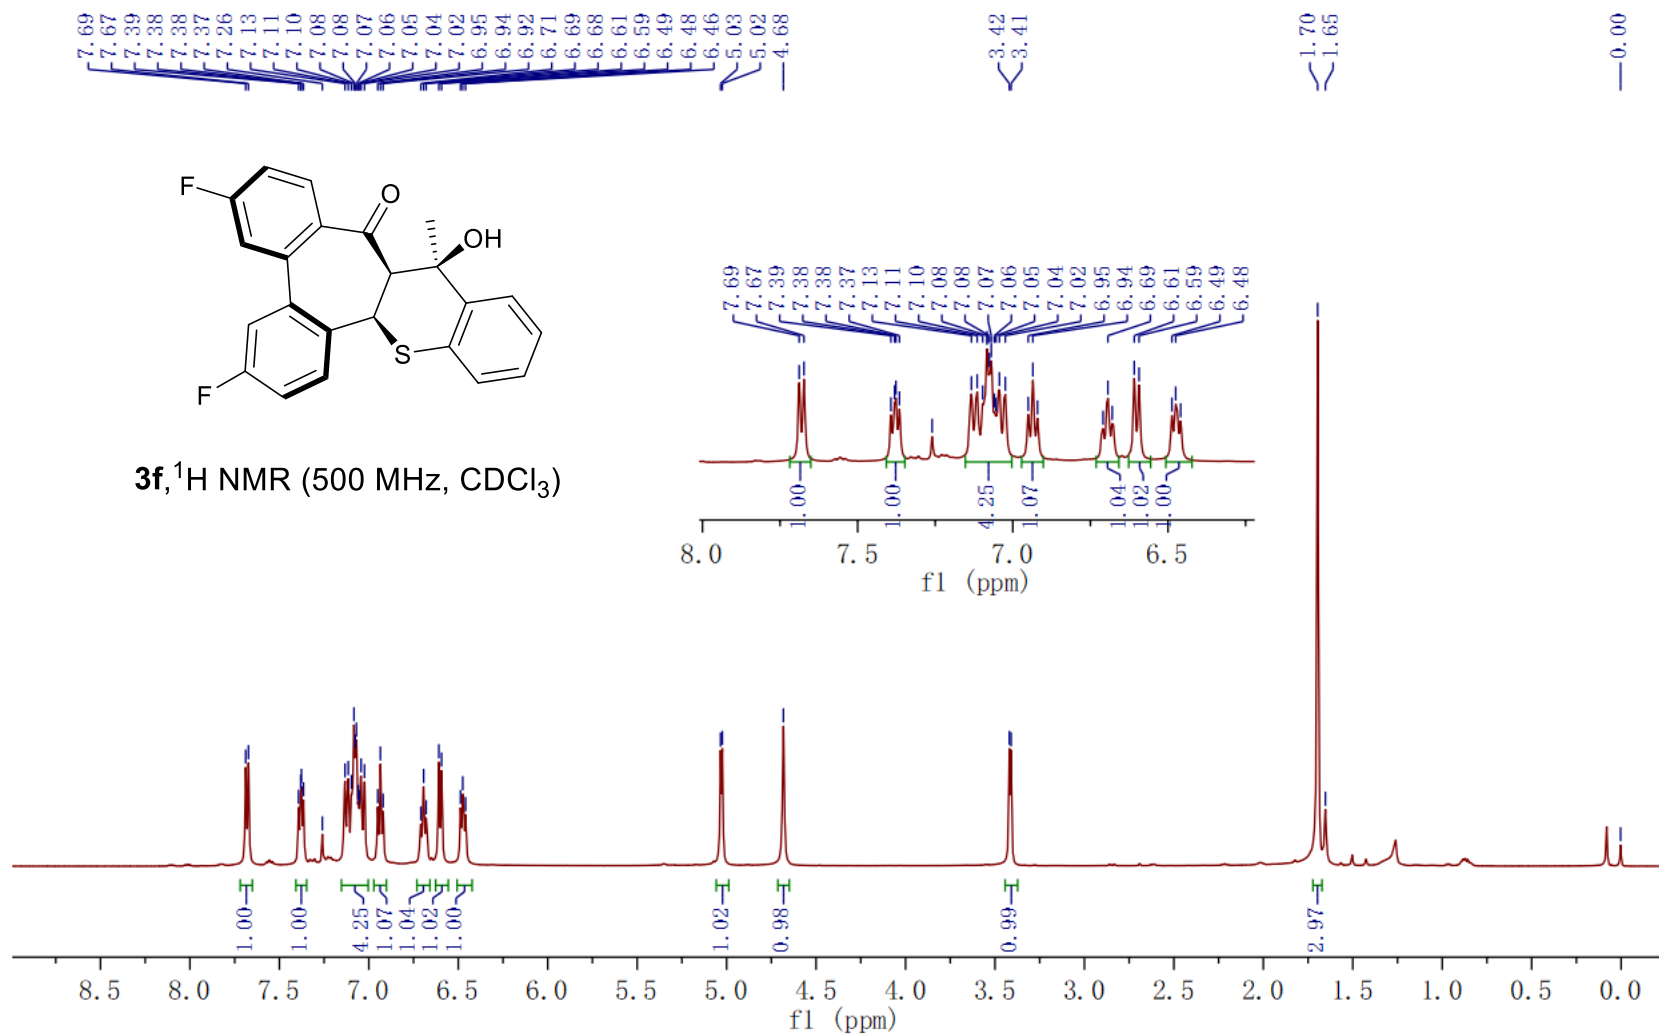

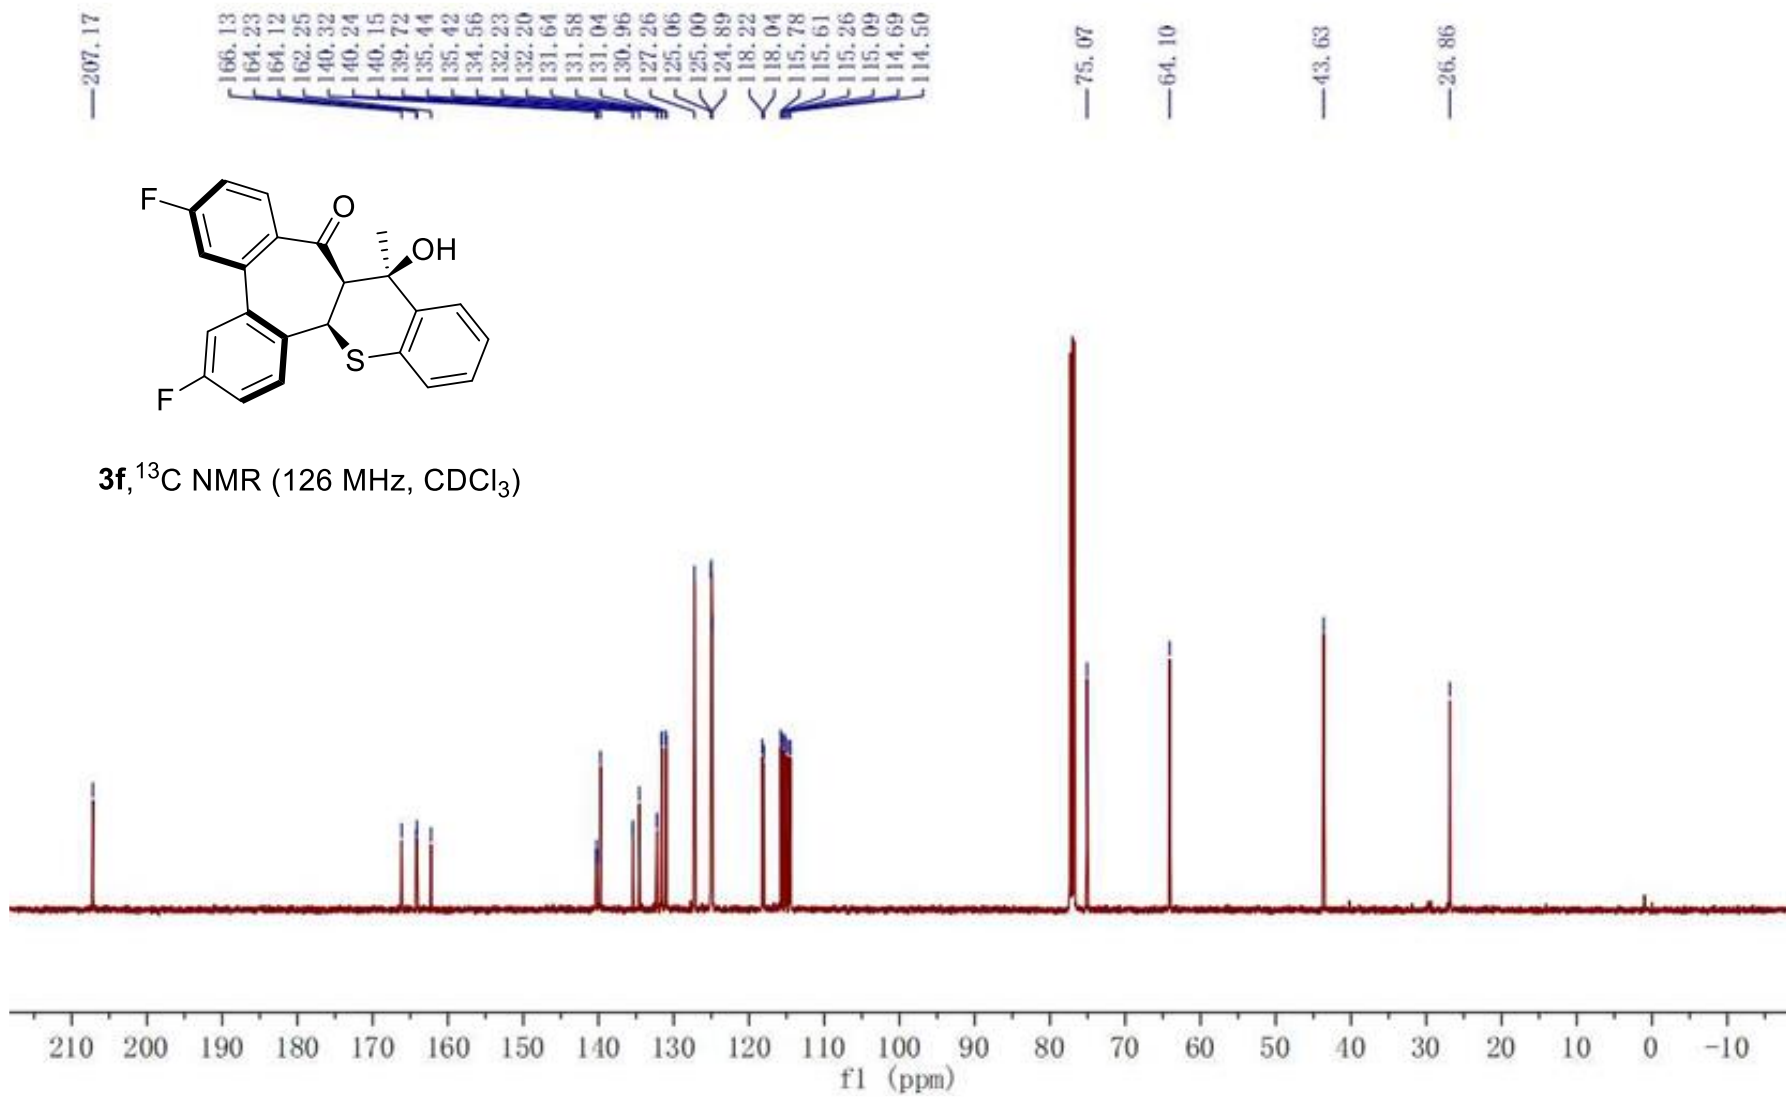

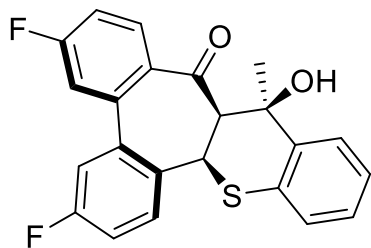

3f,  $^{19}\text{F}$  NMR (377 MHz,  $\text{CDCl}_3$ )

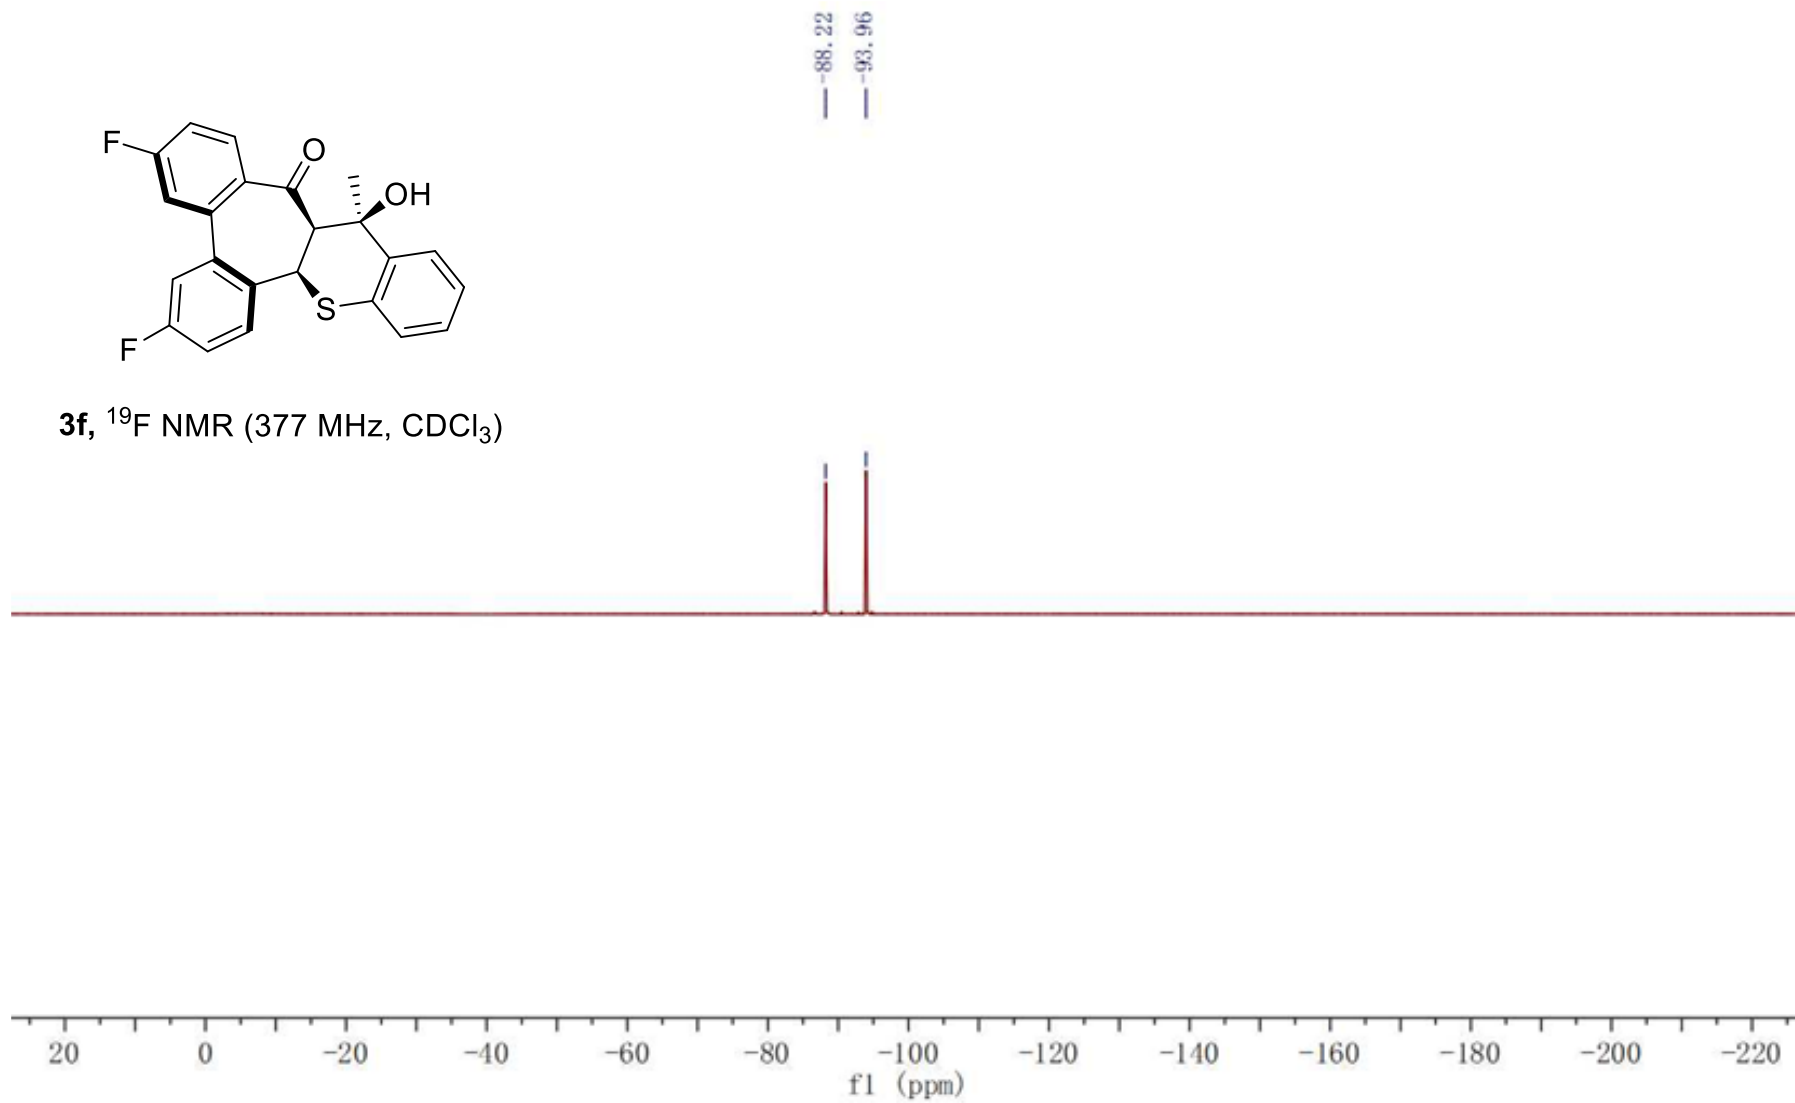



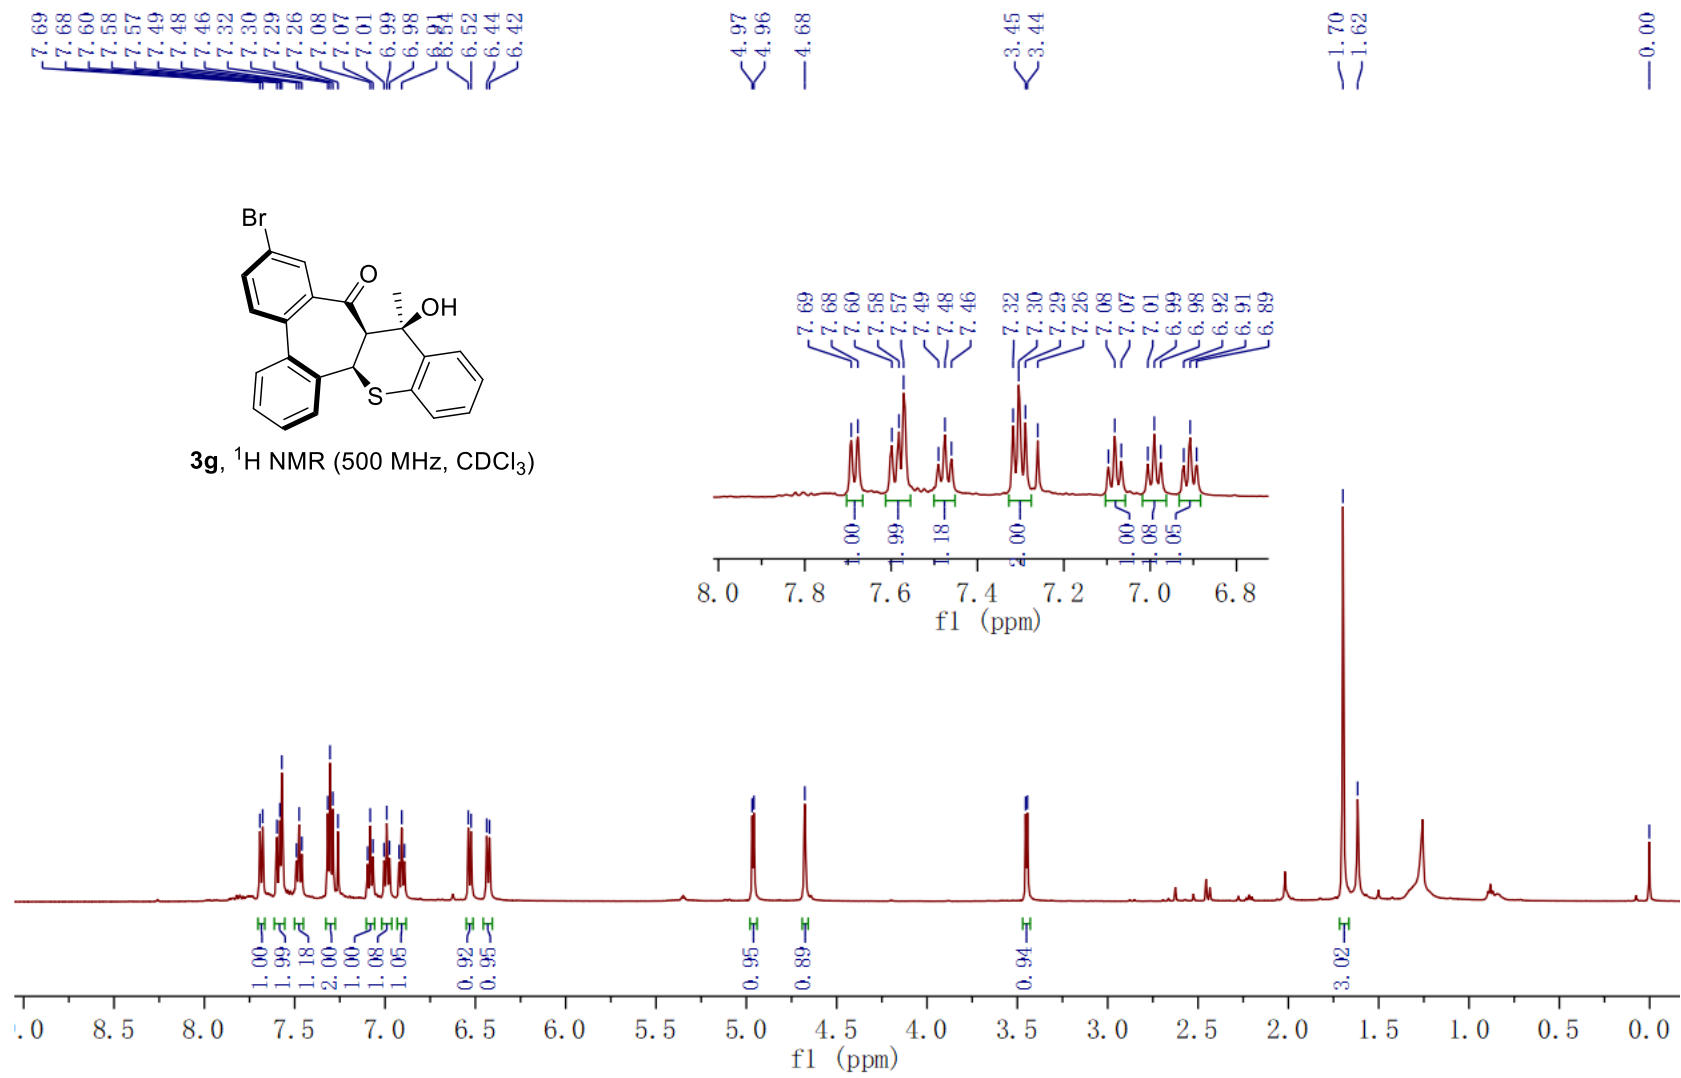

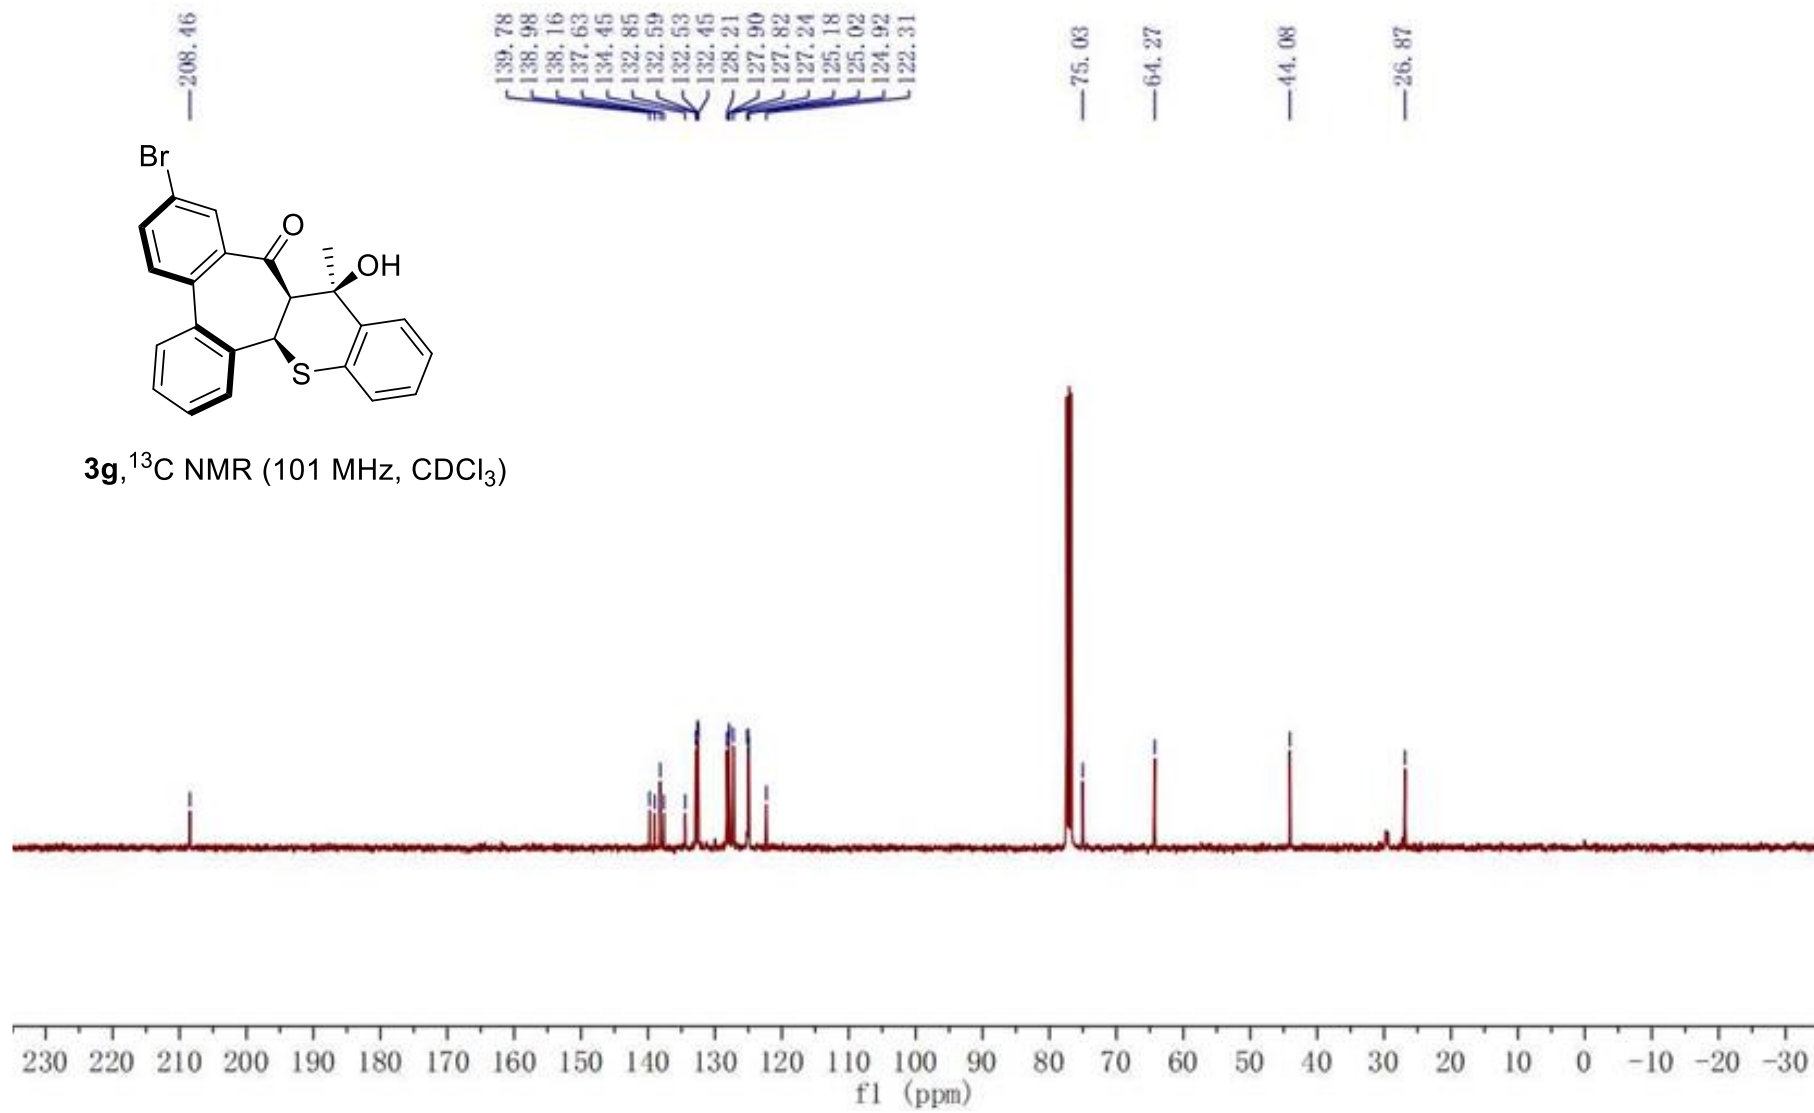

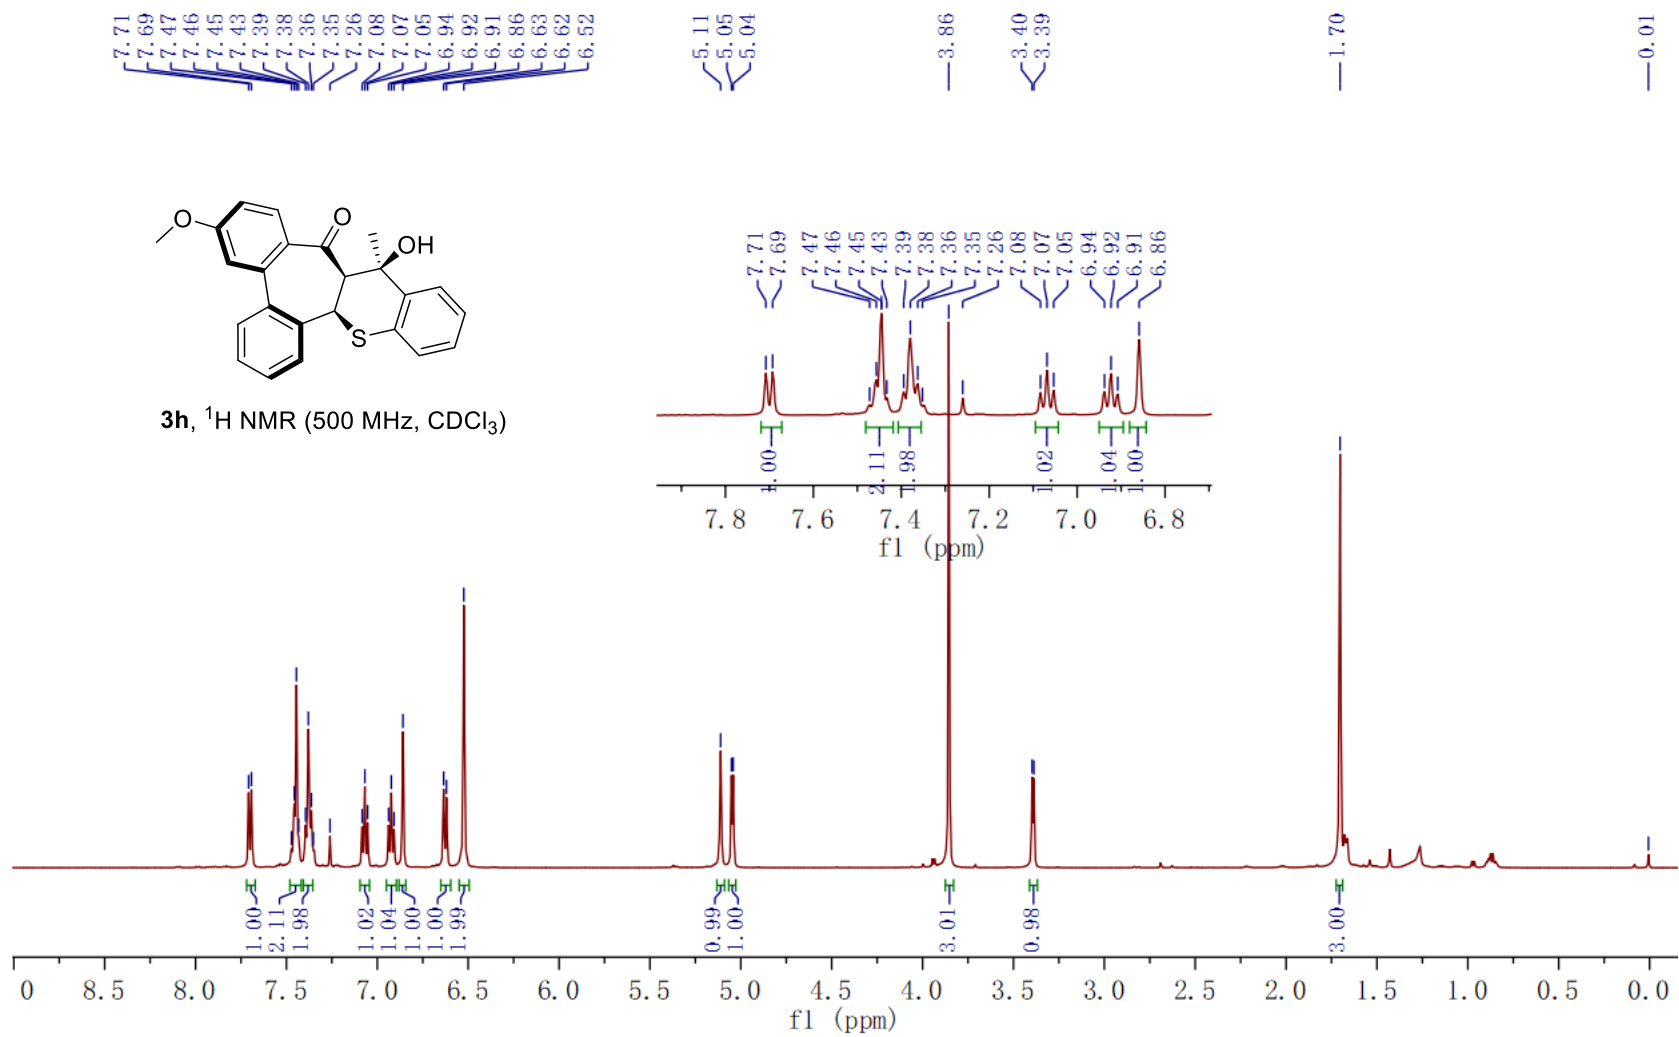

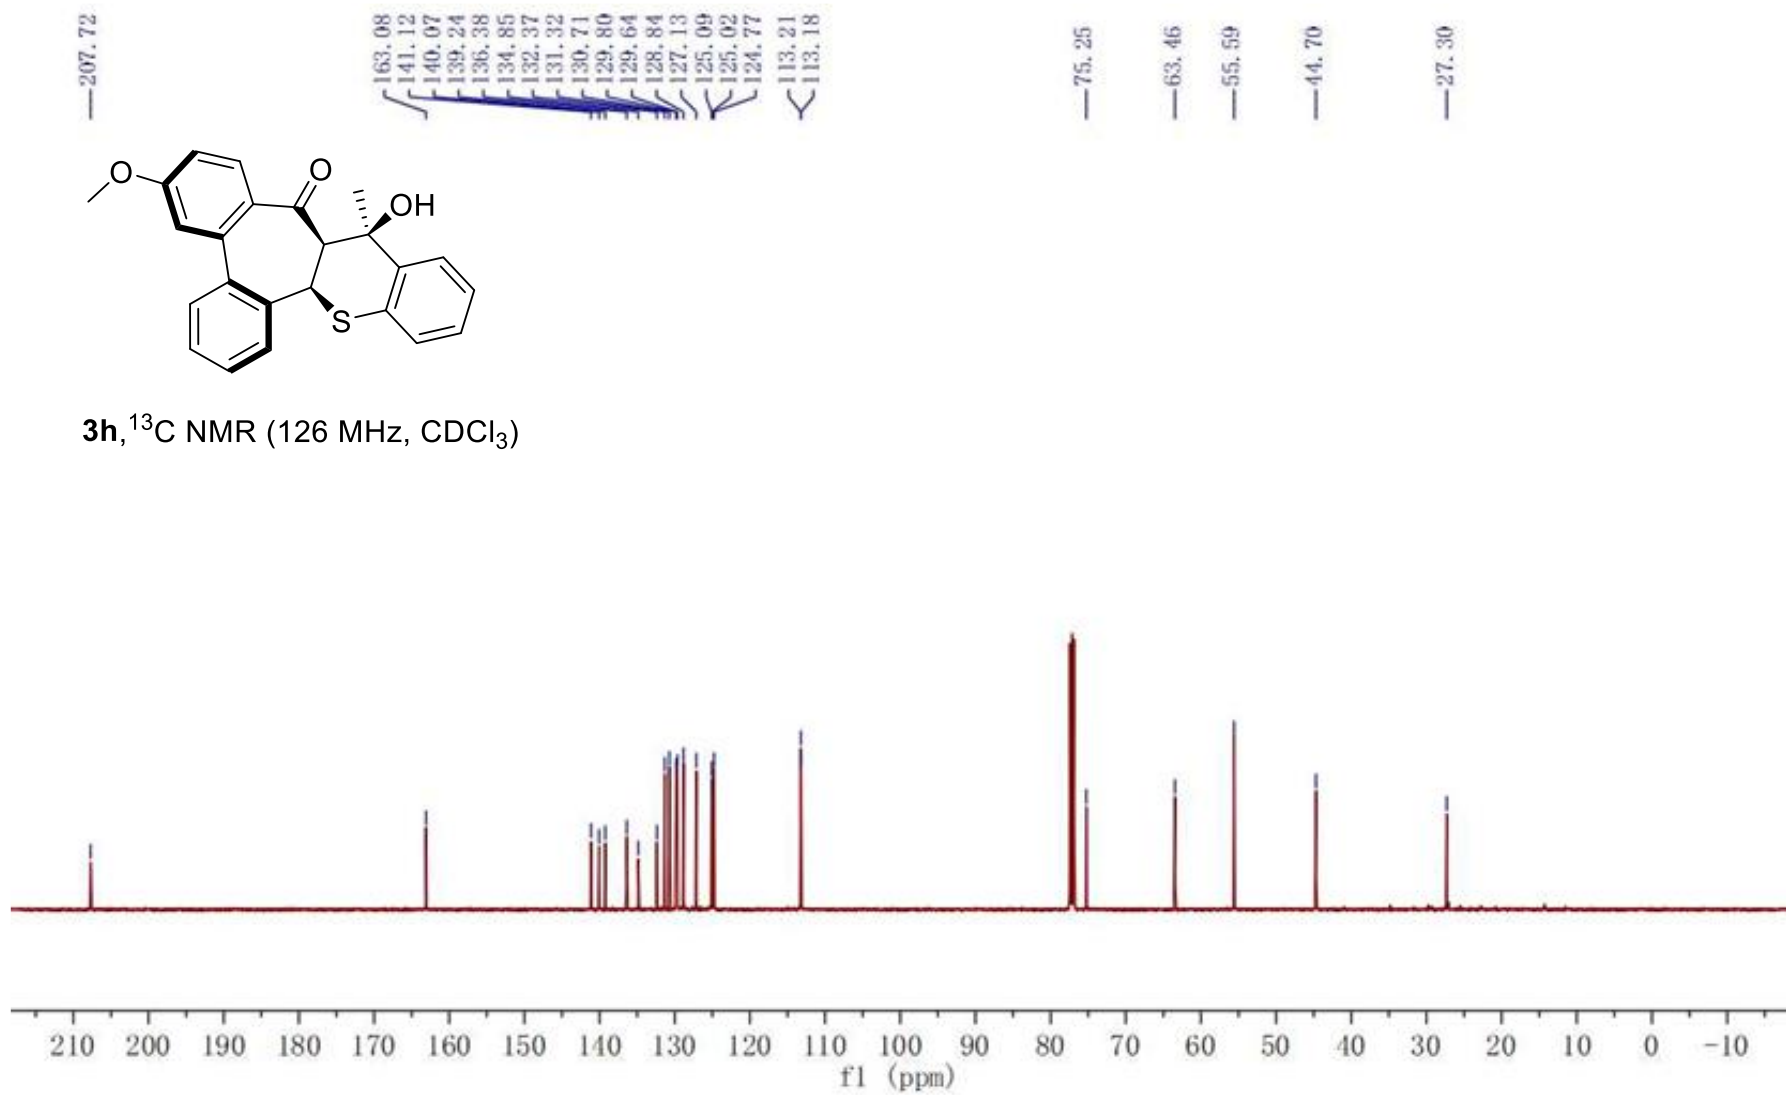

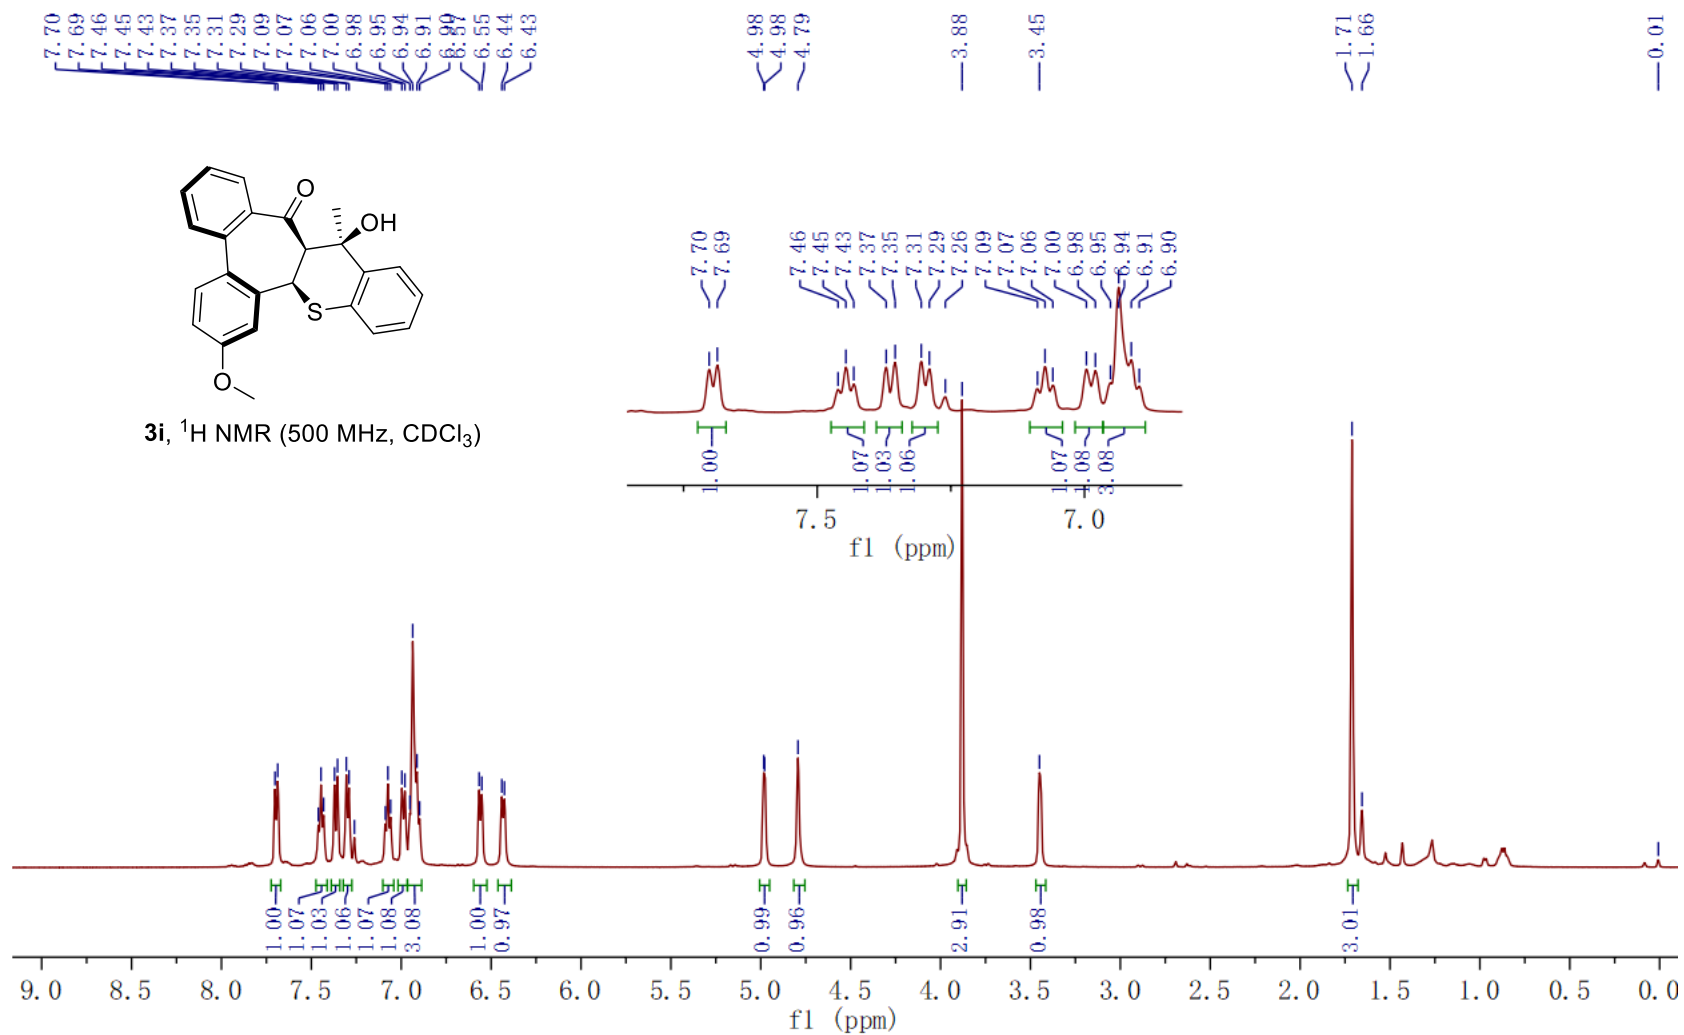

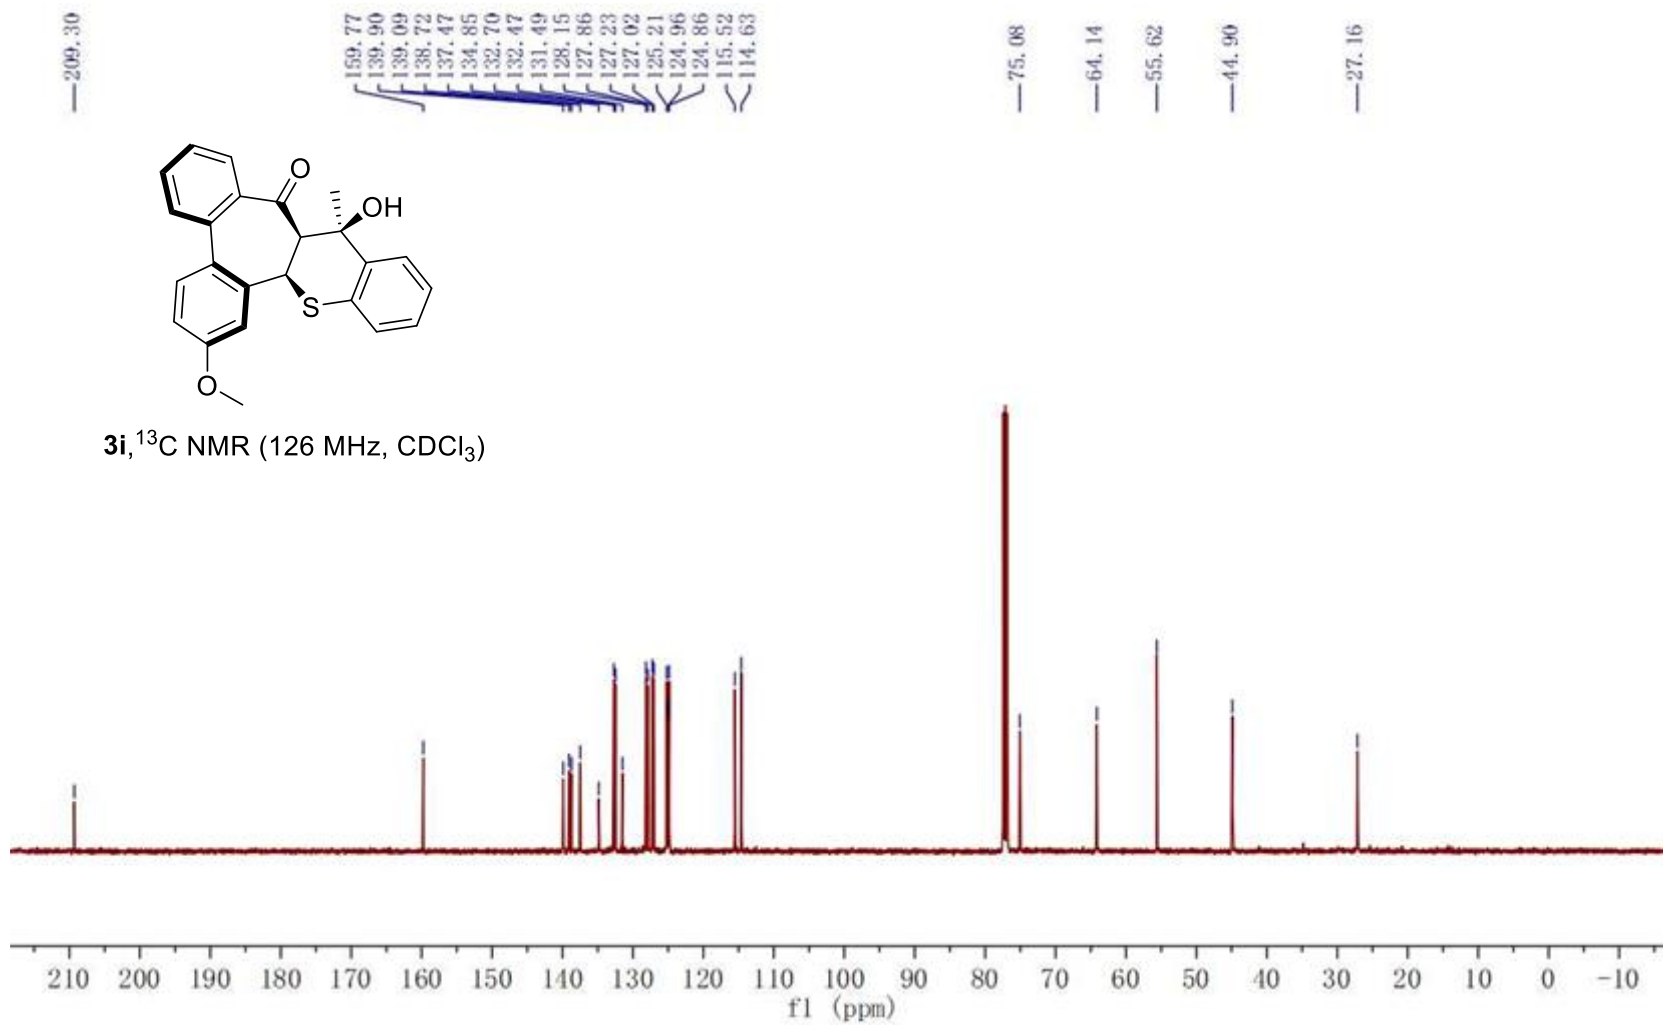

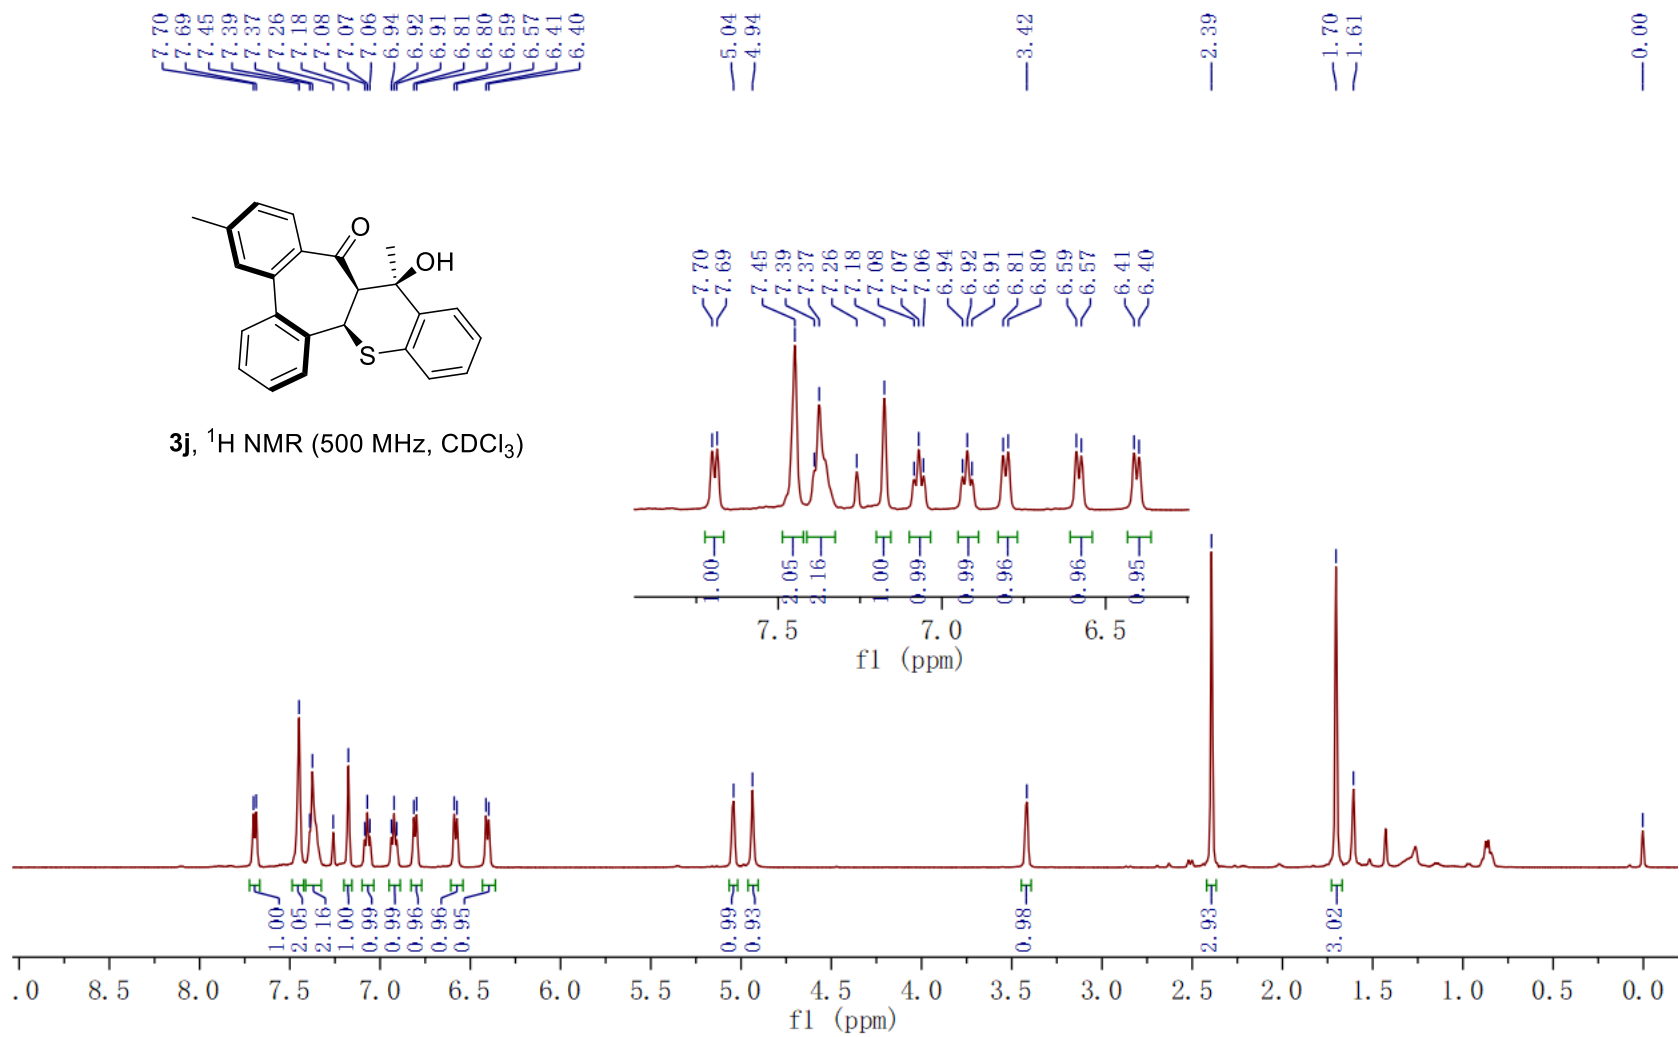

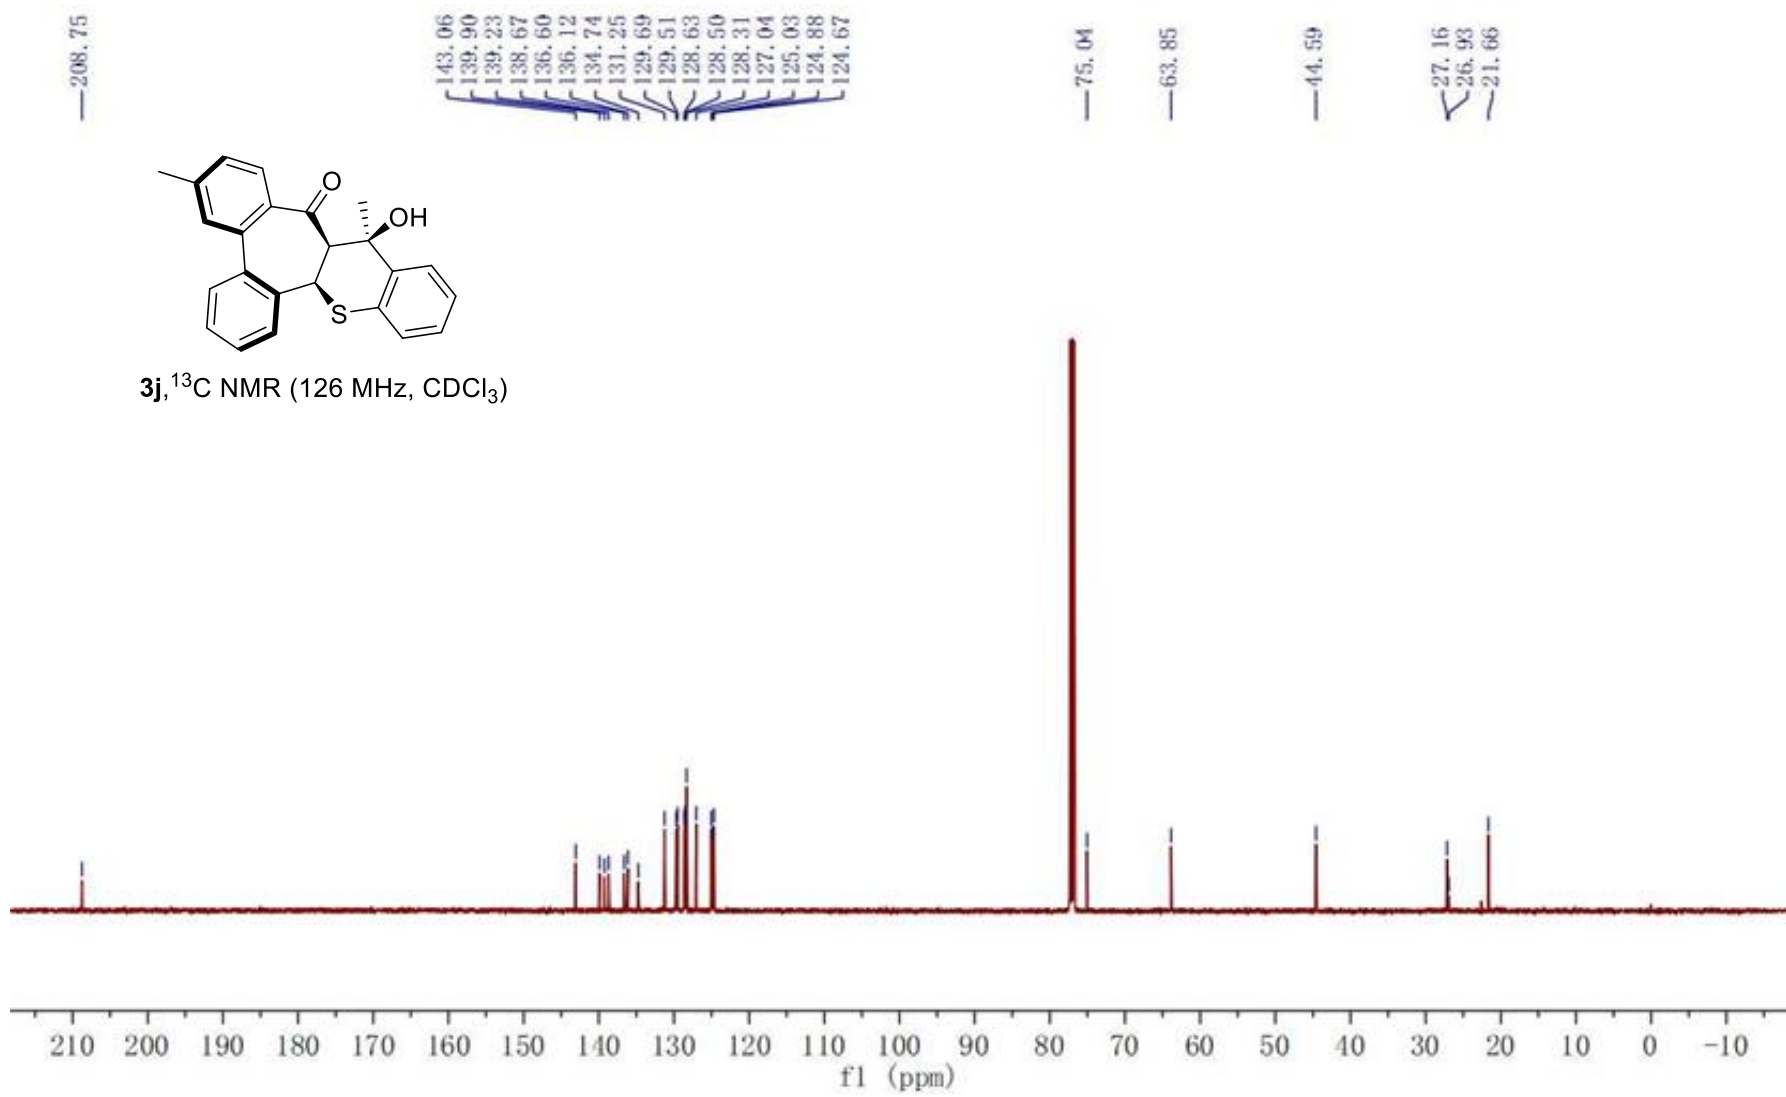



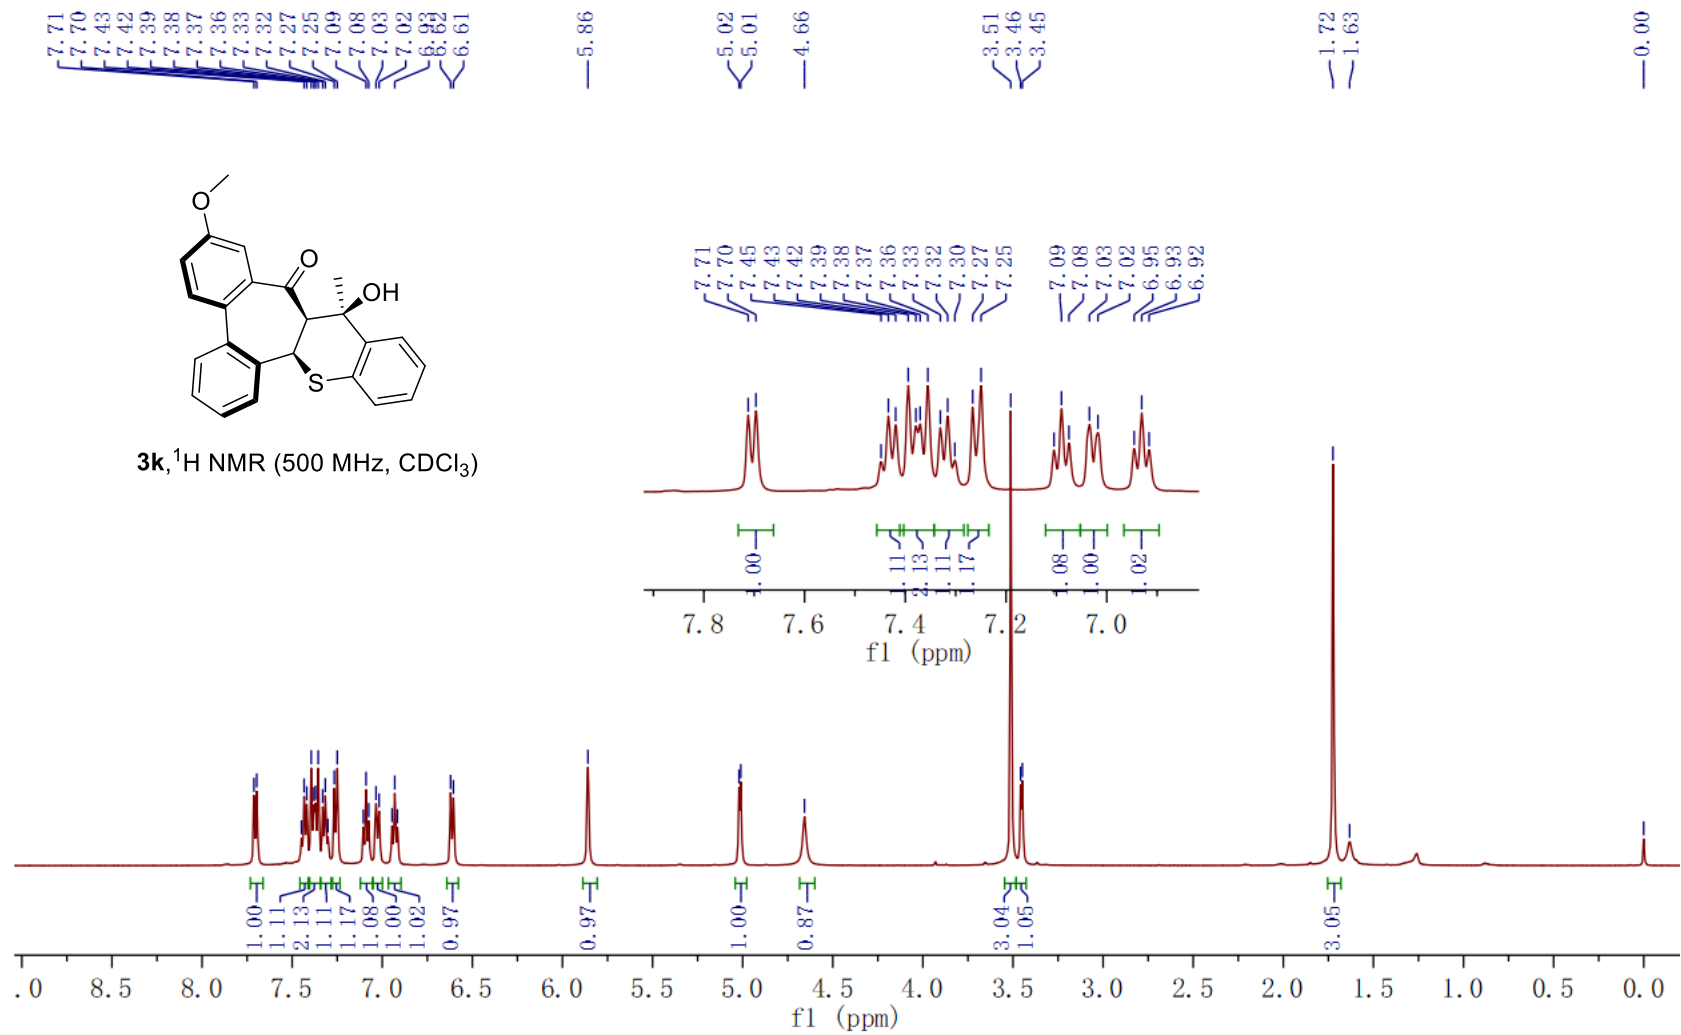

—209.13

158.83  
140.06  
140.02  
138.97  
135.76  
135.43  
131.60  
131.03  
129.78  
129.66  
129.62  
128.12  
127.11  
125.51  
125.01  
124.71  
120.37  
110.74

—75.13

—64.84

—55.29

—44.71

—26.66

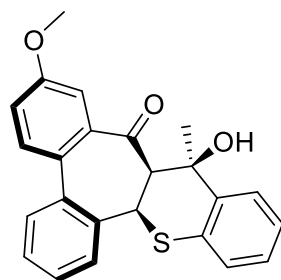

**3k**,  $^{13}\text{C}$  NMR (126 MHz,  $\text{CDCl}_3$ )

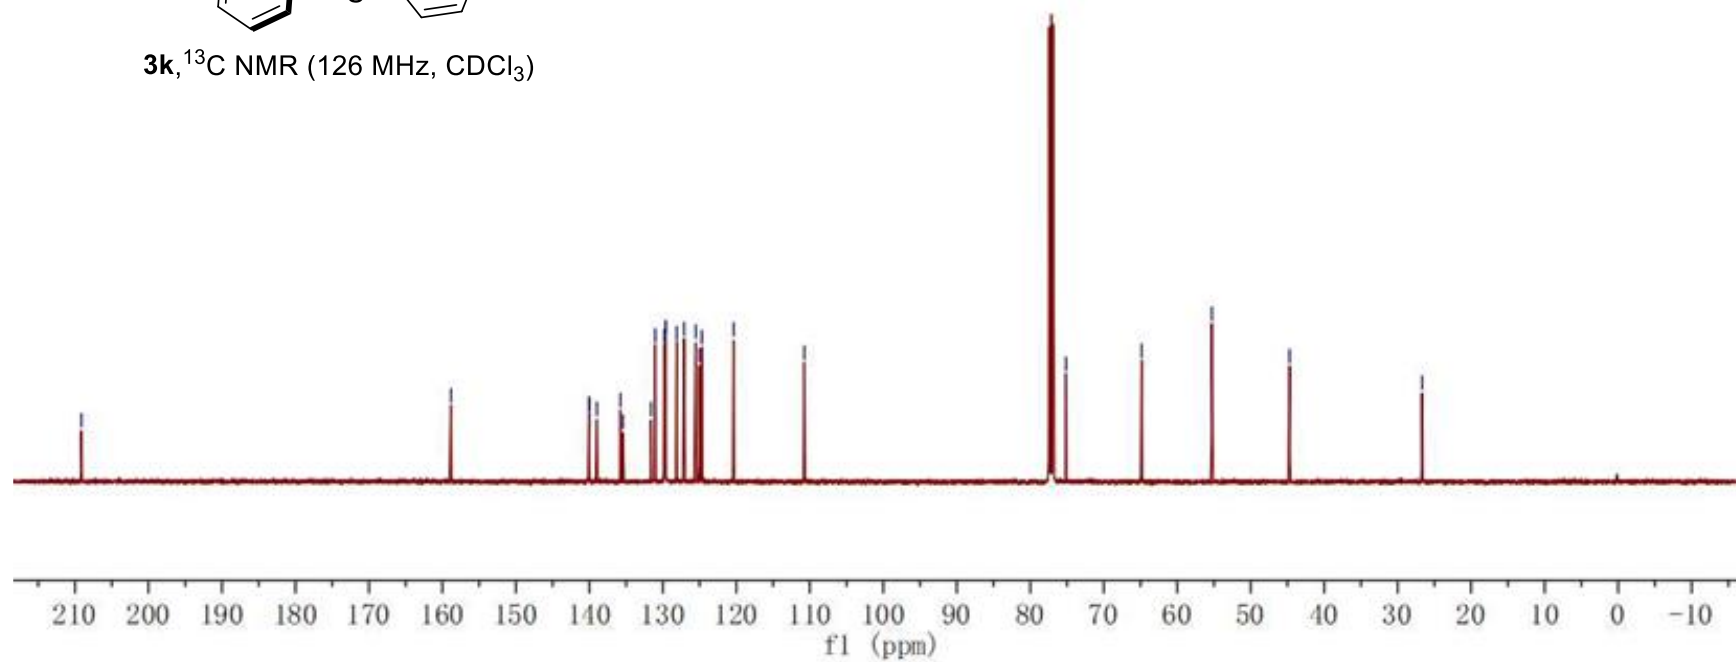



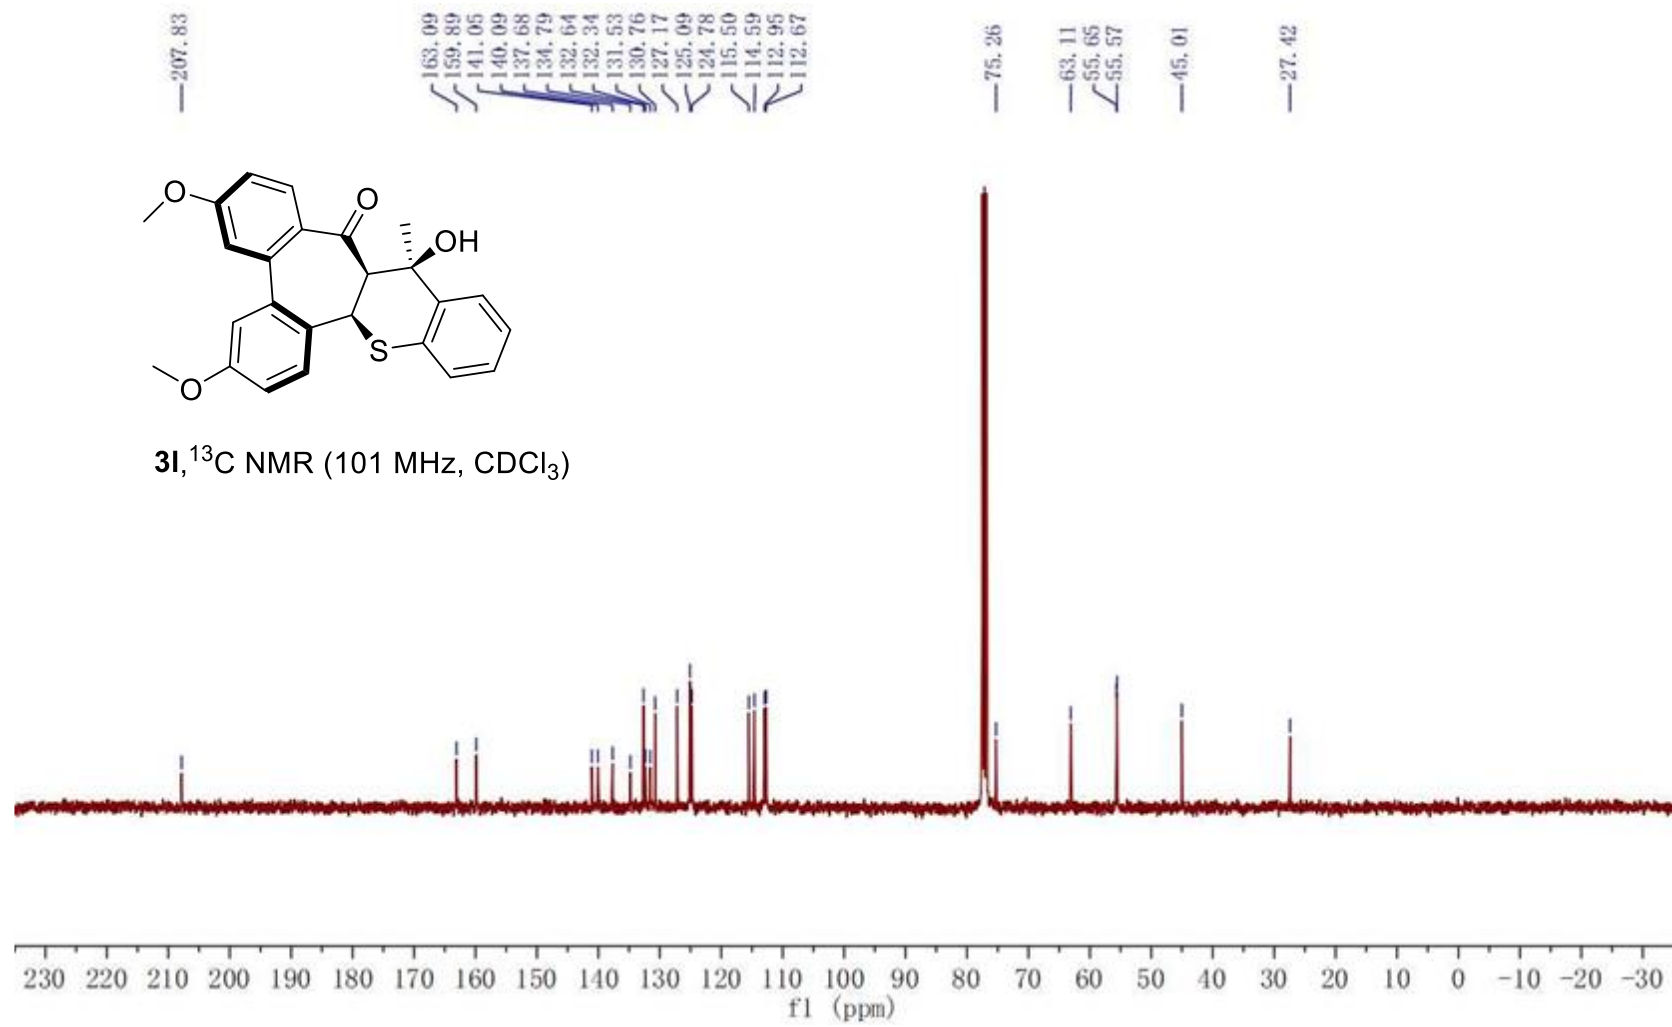

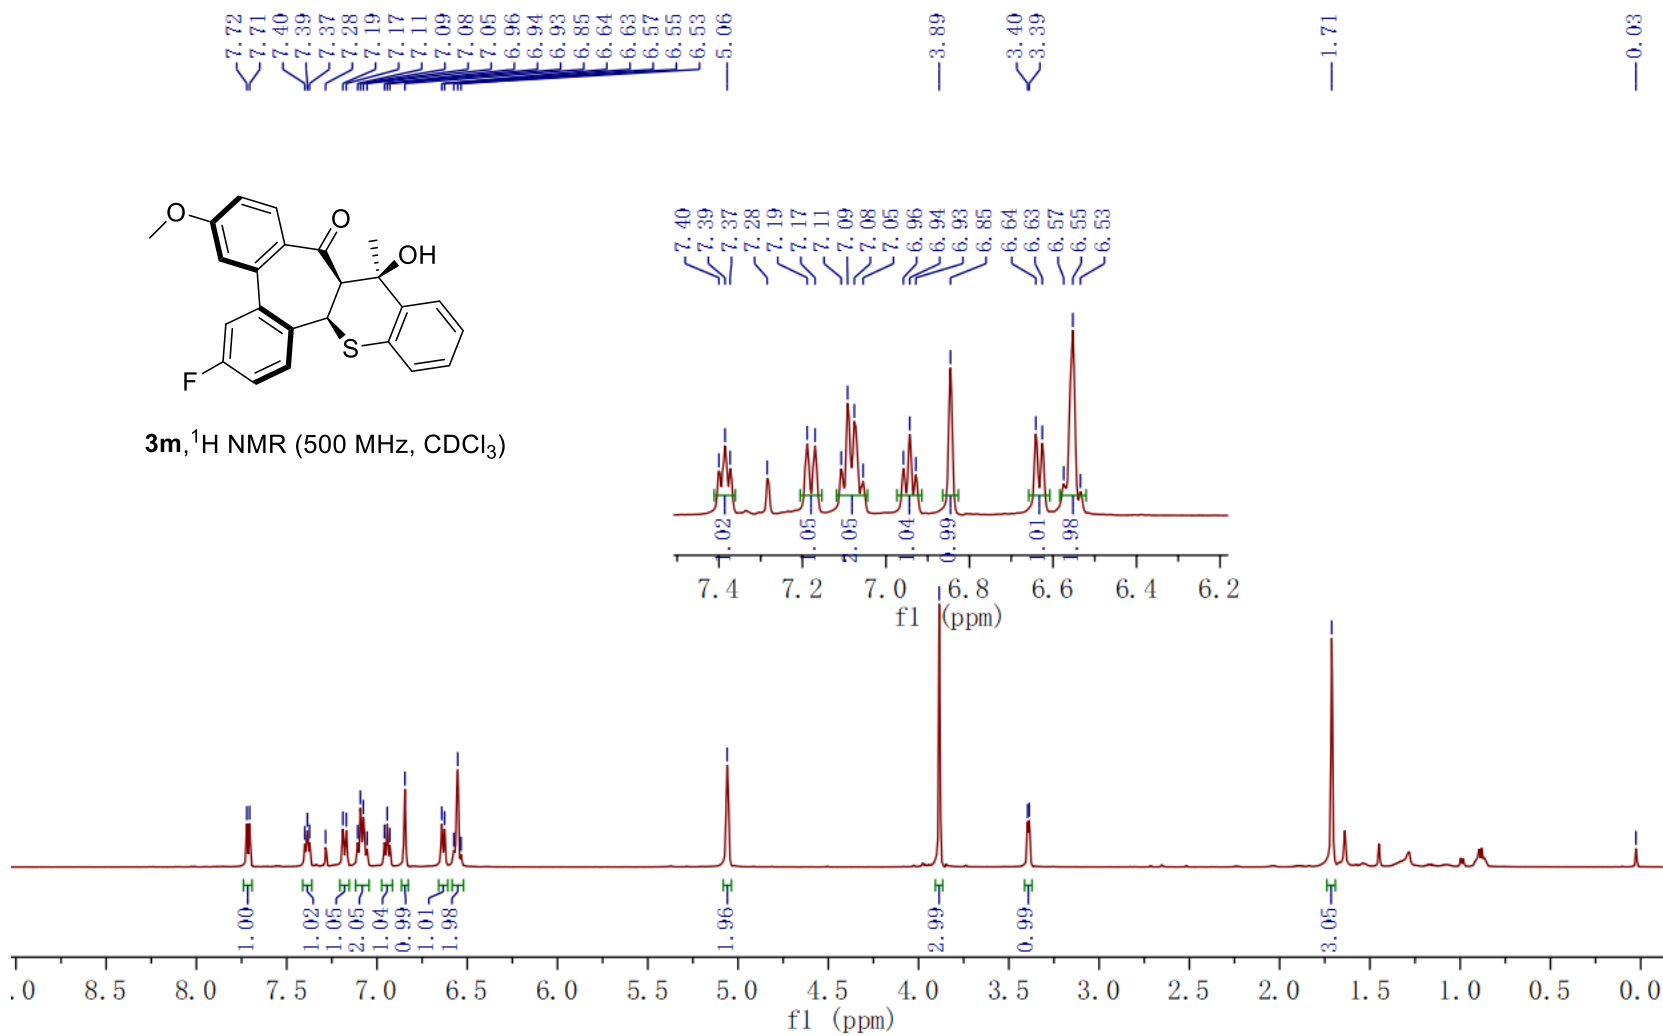

—207.32

164.31  
163.16  
162.34  
141.52  
141.45  
140.00  
139.88  
134.70  
132.32  
132.30  
132.27  
131.62  
131.56  
130.88  
127.19  
125.08  
124.90  
118.28  
118.10  
115.42  
115.26  
113.74  
113.11

—75.27

—63.51

—55.66

—43.95

—27.24

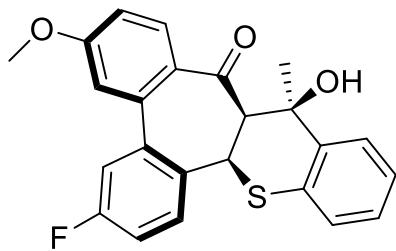

**3m**,  $^{13}\text{C}$  NMR (101 MHz,  $\text{CDCl}_3$ )

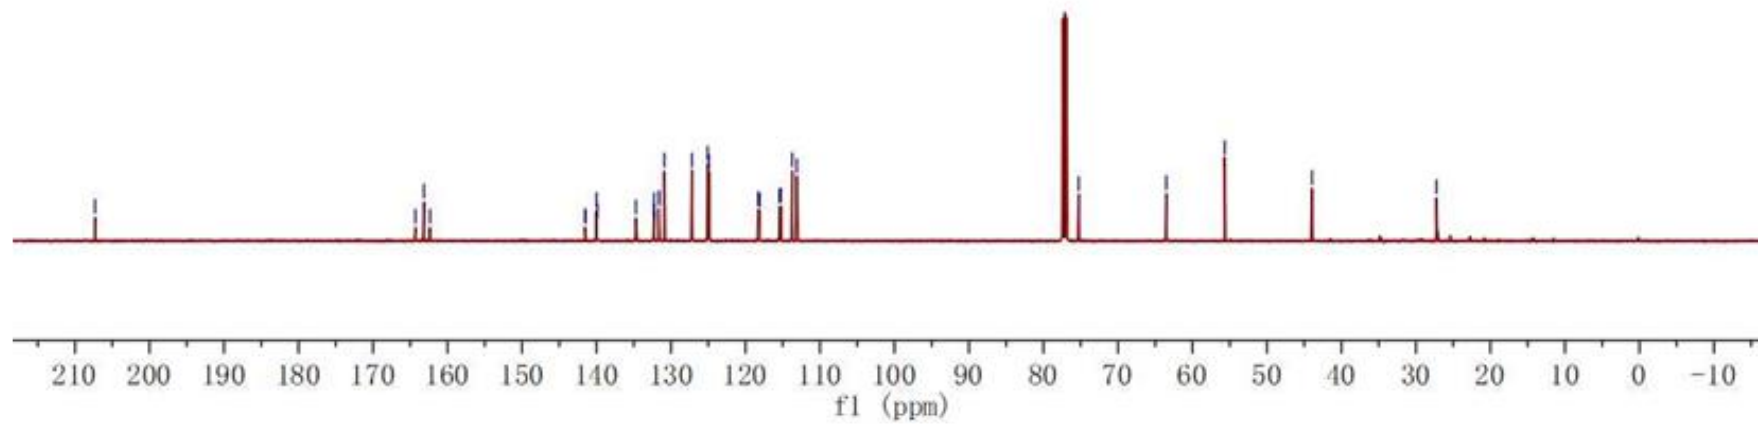

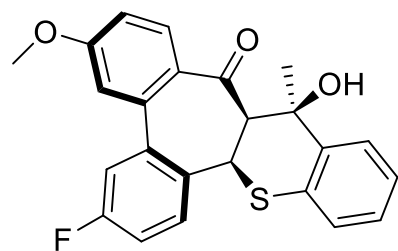

**3m**,  $^{19}\text{F}$  NMR (377 MHz,  $\text{CDCl}_3$ )

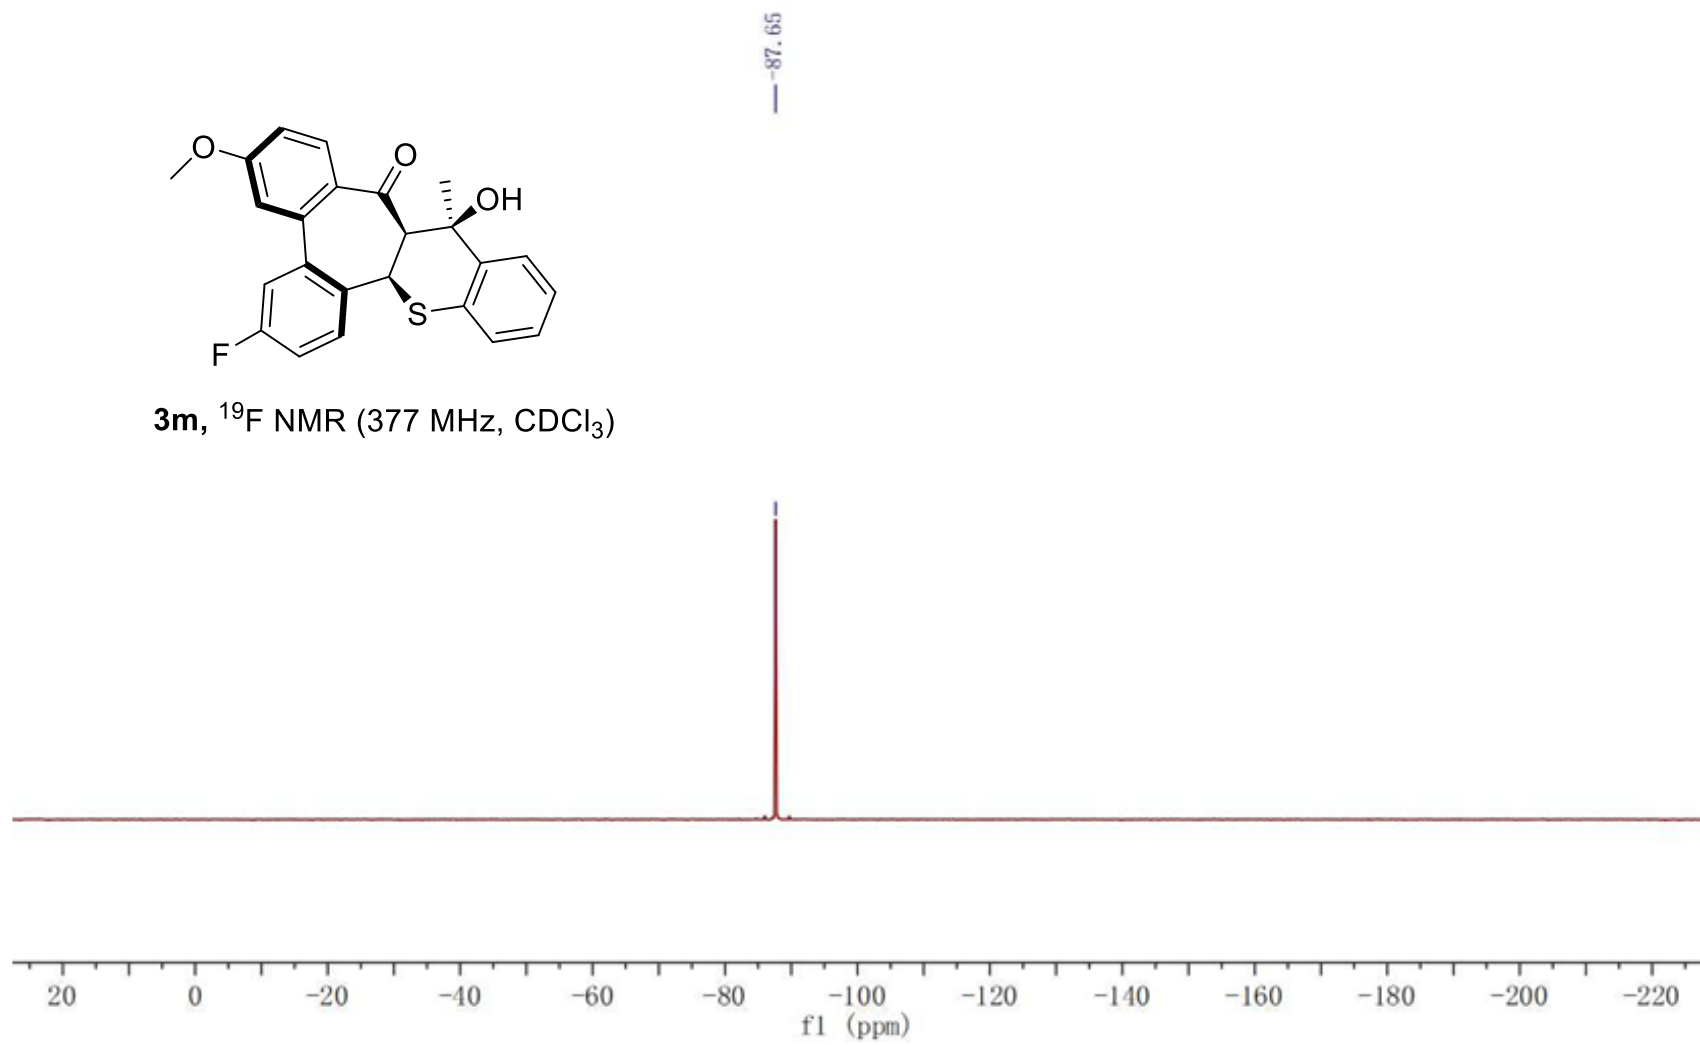

7.71  
7.69  
7.31  
7.30  
7.28  
7.24  
7.22  
7.21  
7.11  
7.09  
7.07  
7.07  
6.97  
6.95  
6.94  
6.70  
6.68  
6.66  
6.64  
6.63  
6.50  
6.48  
6.47

5.04  
5.03  
4.77

3.43  
3.42

2.44

1.72

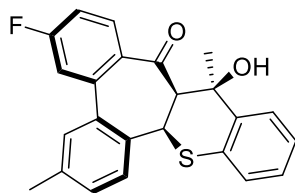

**3n**,  $^1\text{H}$  NMR (500 MHz,  $\text{CDCl}_3$ )

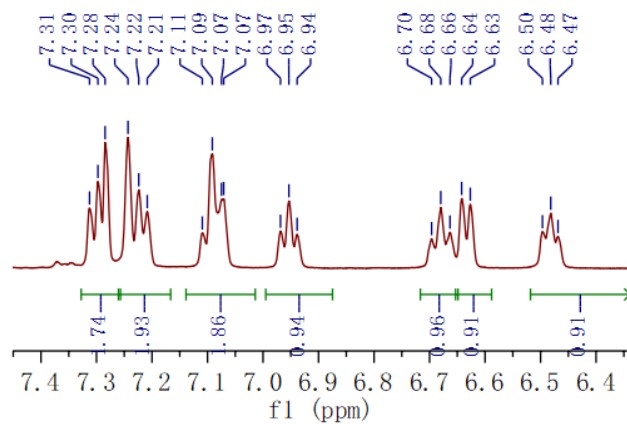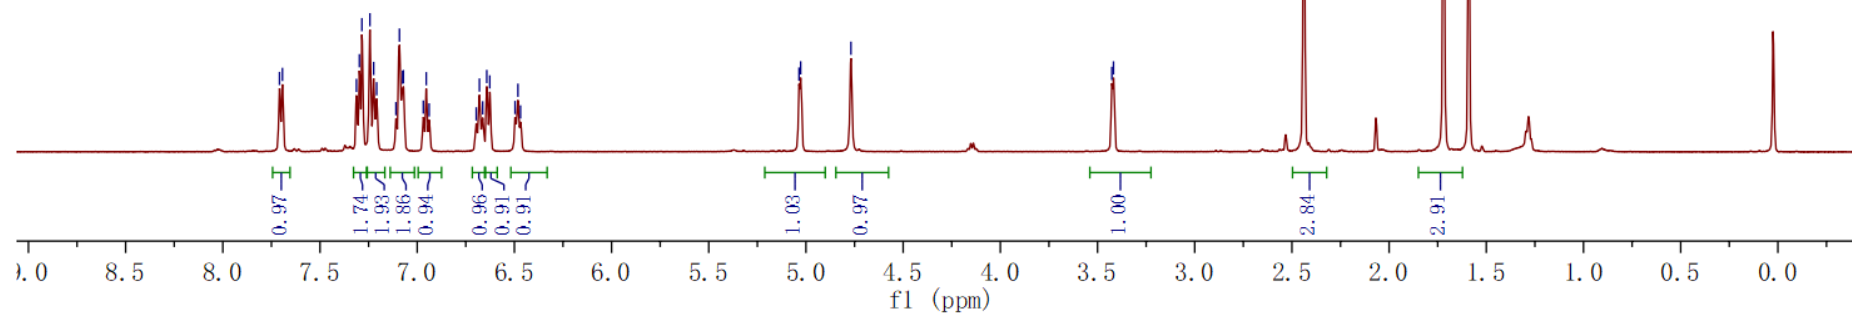



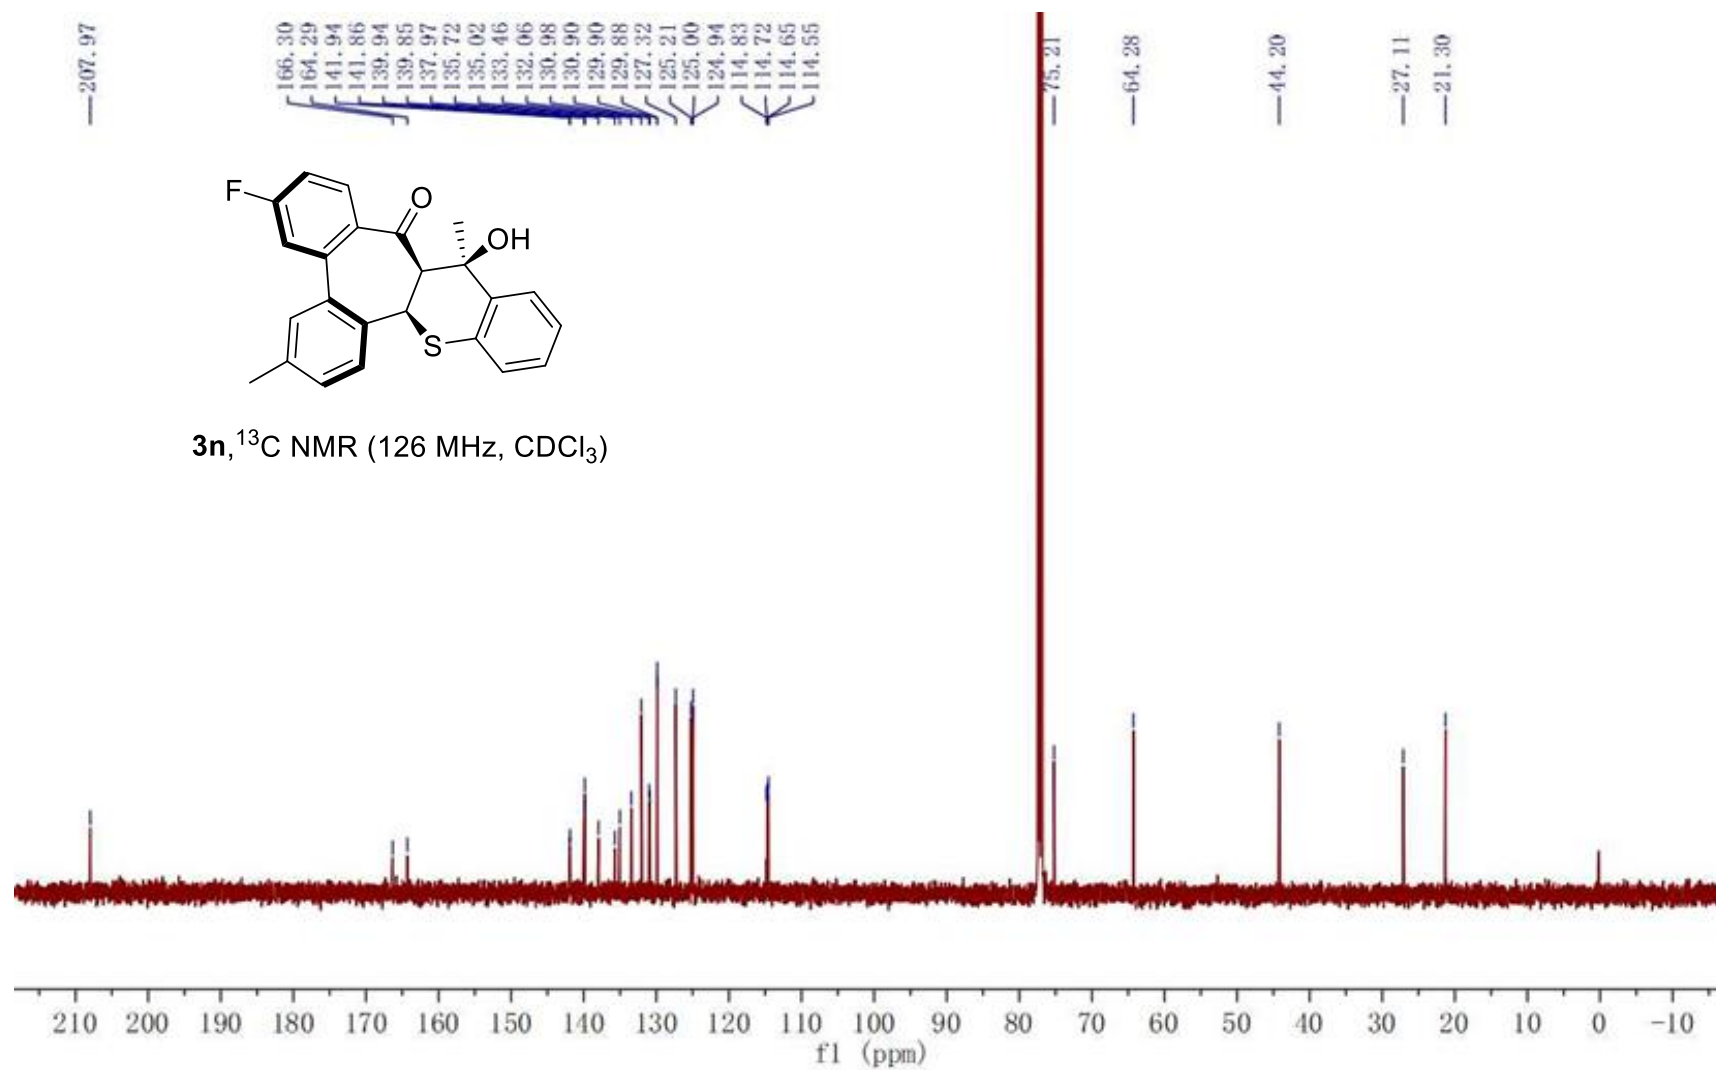

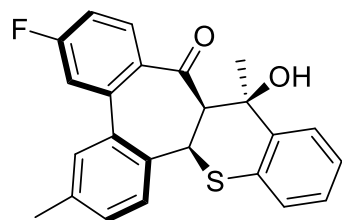

**3n**,  $^{19}\text{F}$  NMR (471 MHz,  $\text{CDCl}_3$ )

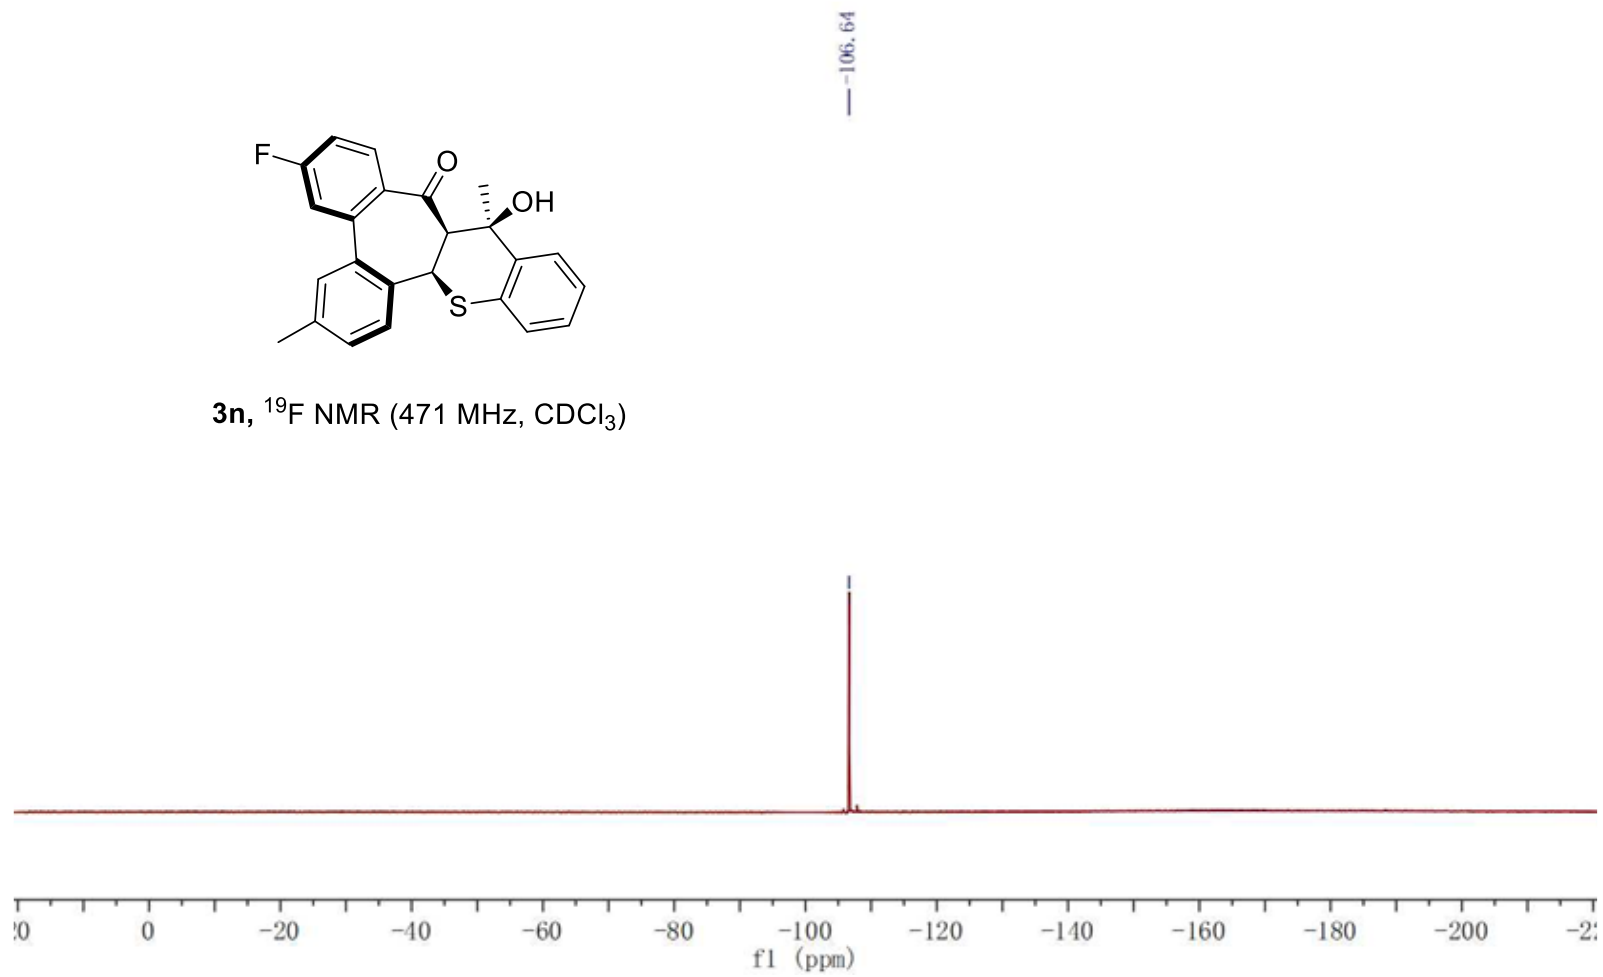

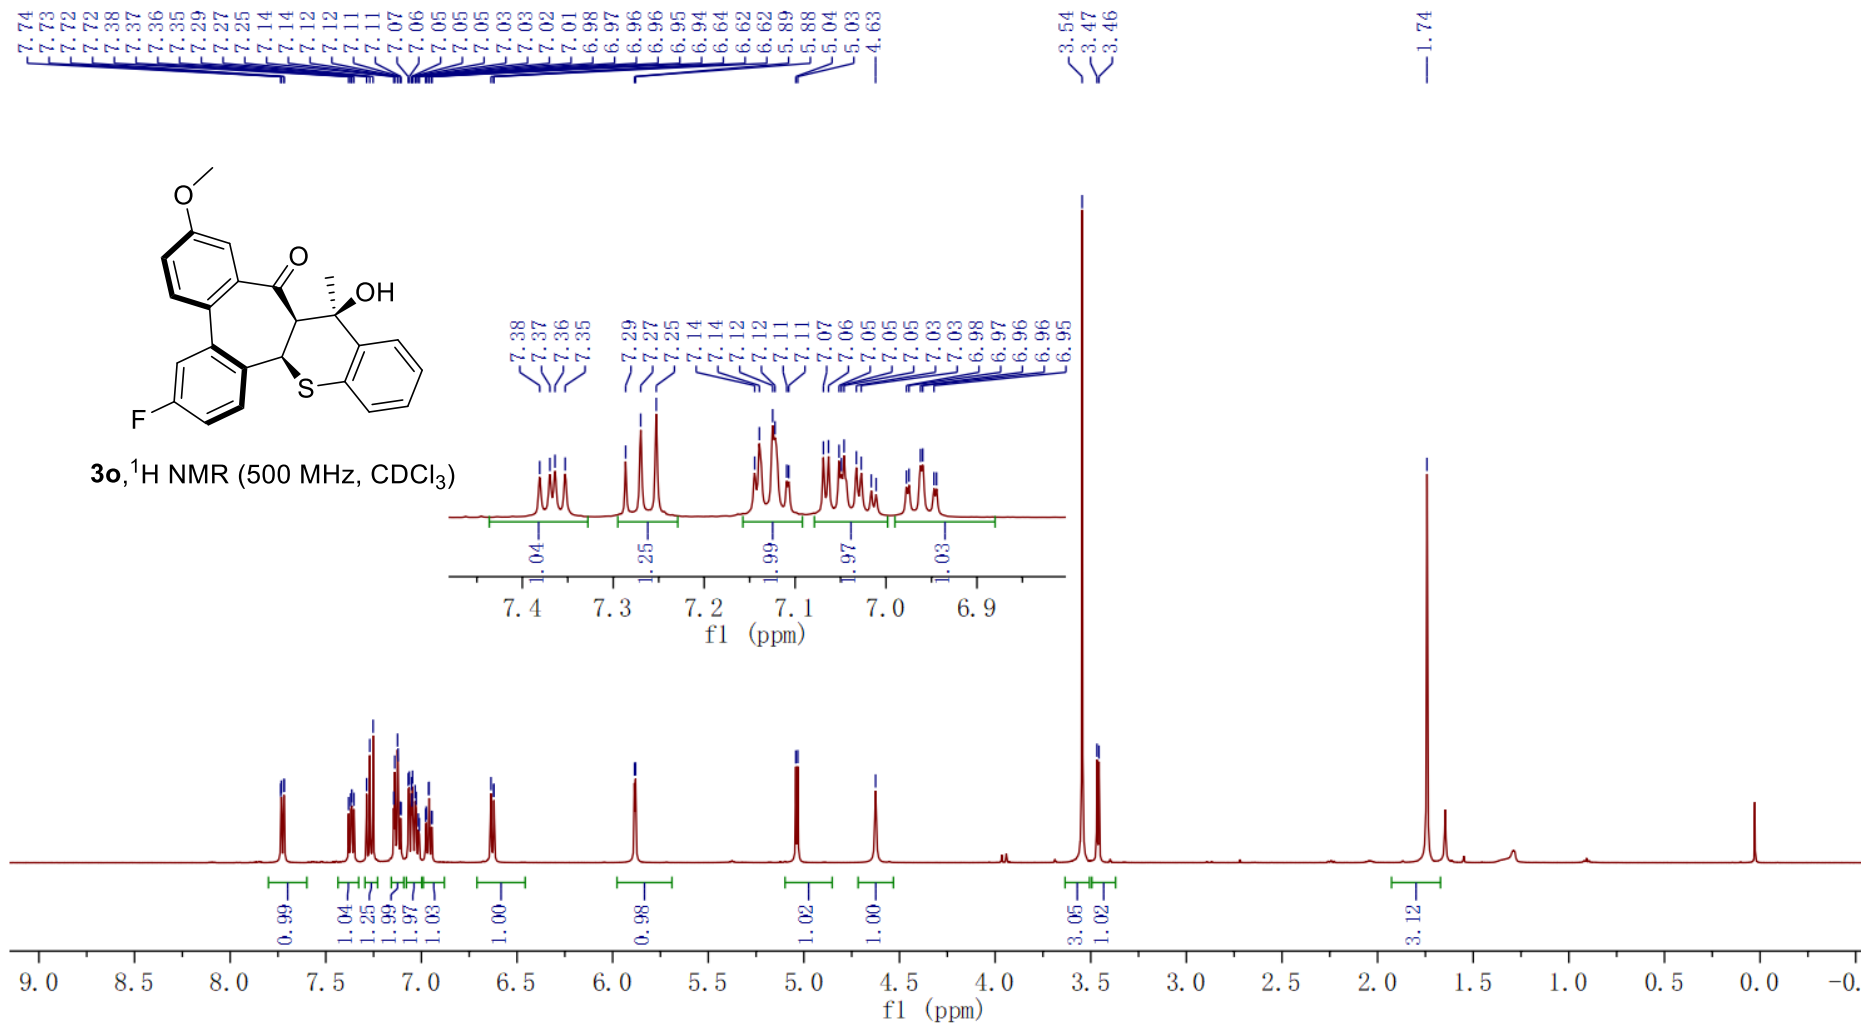

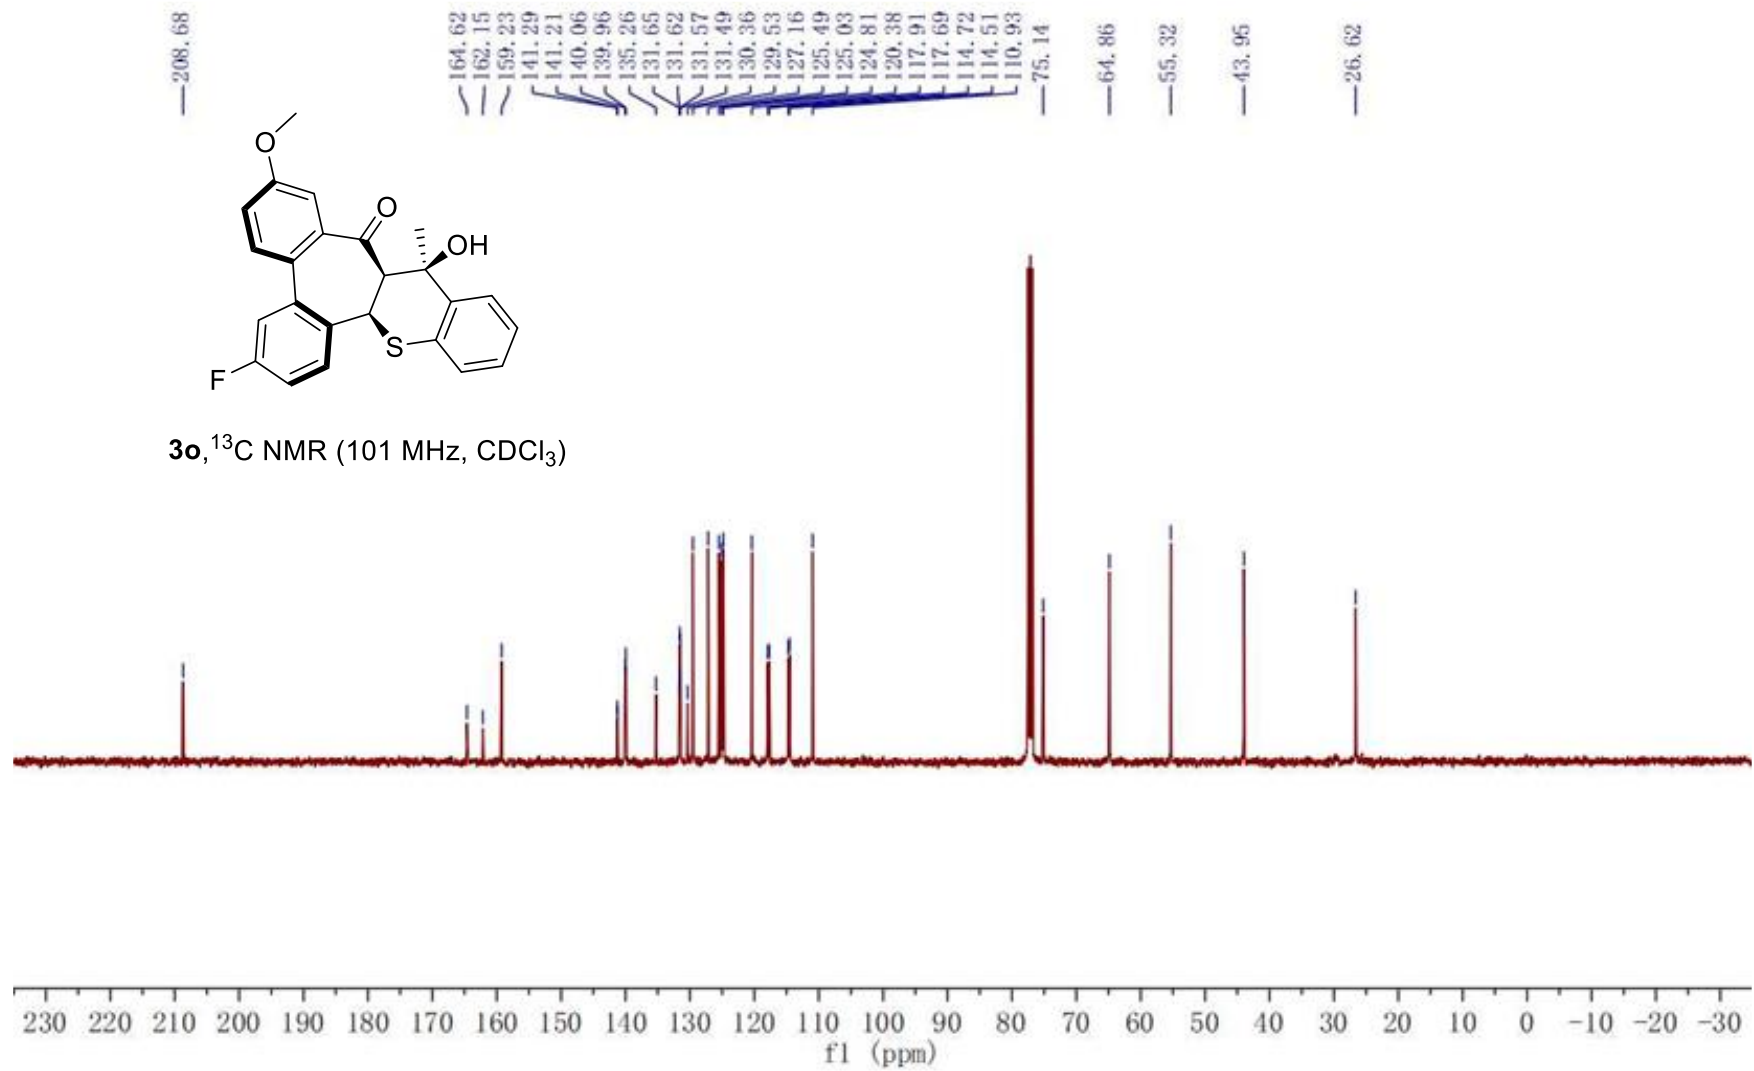

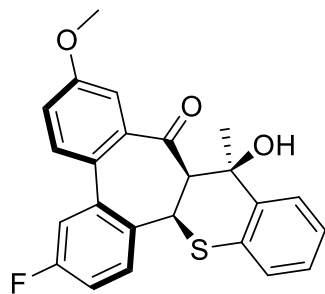

**3o**,  $^{19}\text{F}$  NMR (471 MHz,  $\text{CDCl}_3$ )

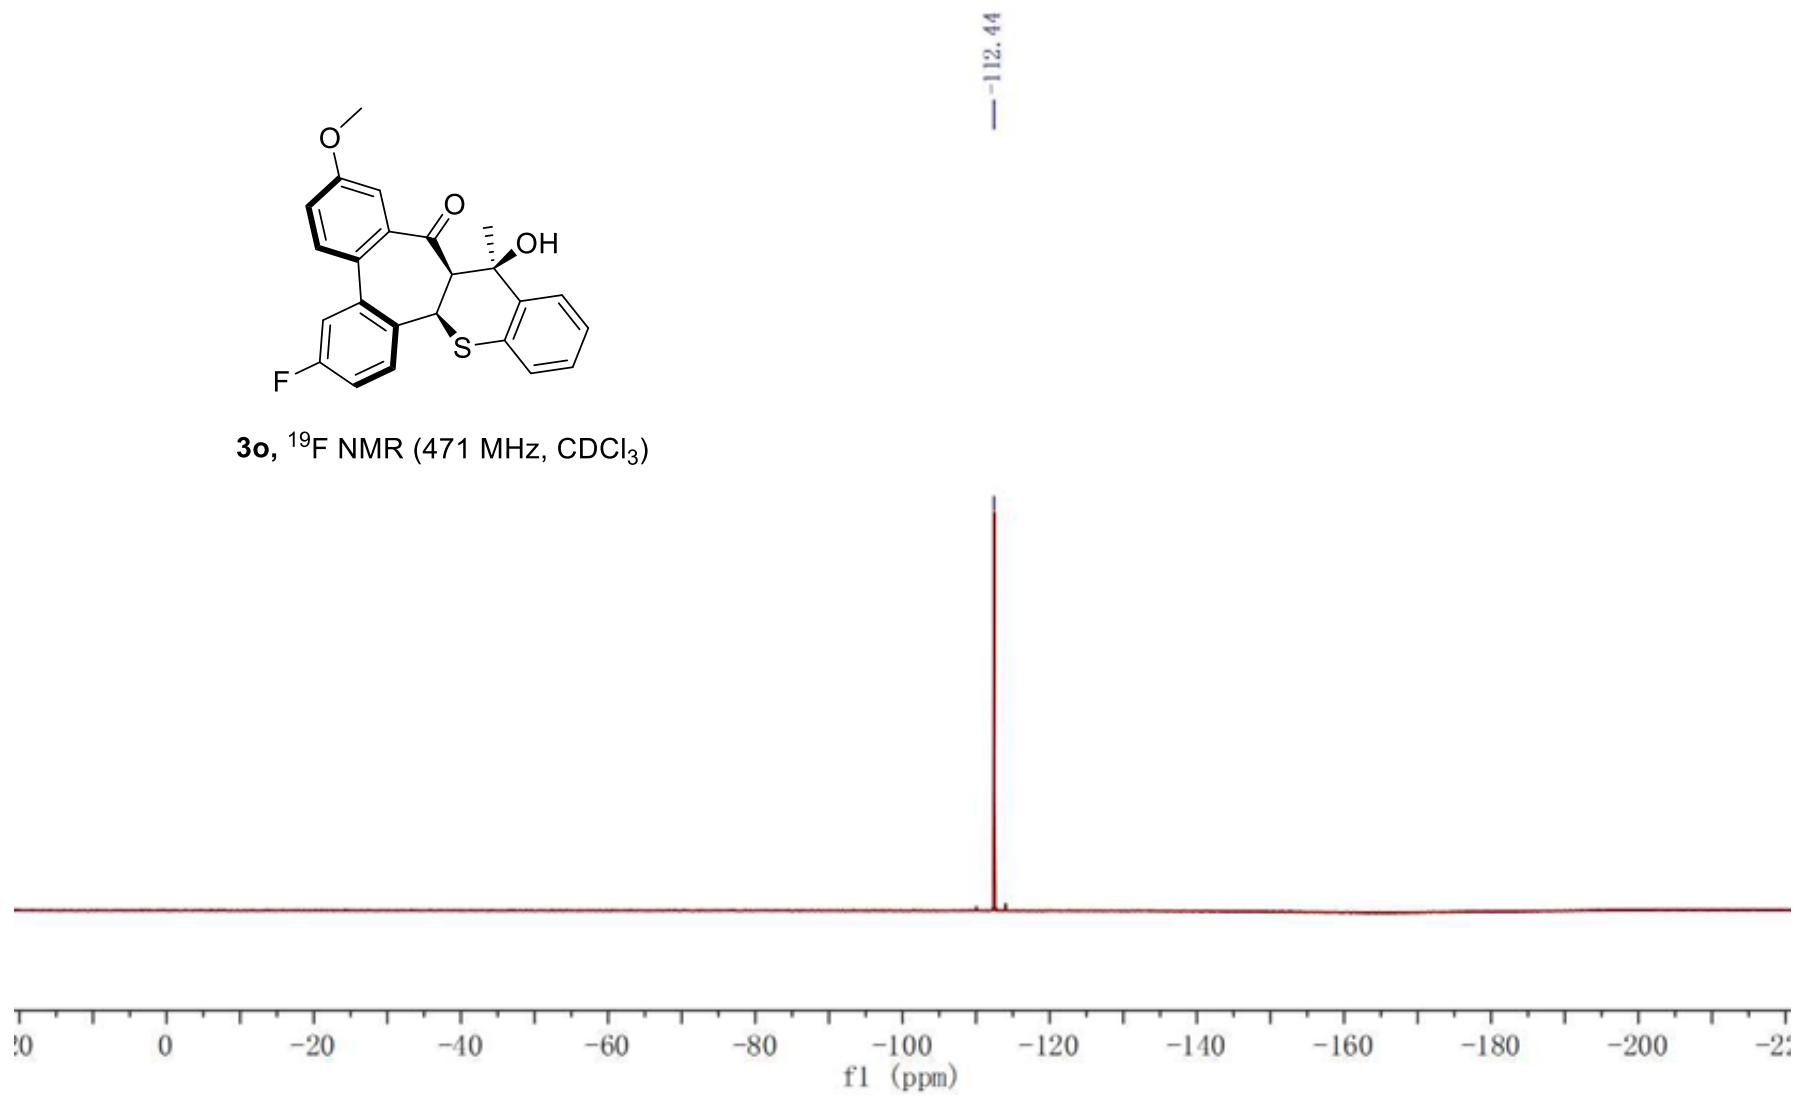

7.69  
7.67  
7.37  
7.36  
7.34  
7.26  
7.17  
7.14  
7.08  
7.07  
7.05  
7.04  
7.02  
6.93  
6.92  
6.90  
6.83  
6.82  
6.57  
6.55  
6.41  
6.39

5.03  
4.86

3.39

2.39

1.69

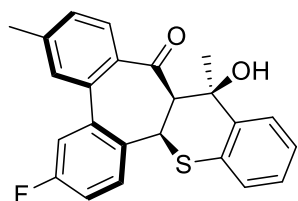

3p,  $^1\text{H}$  NMR (500 MHz,  $\text{CDCl}_3$ )

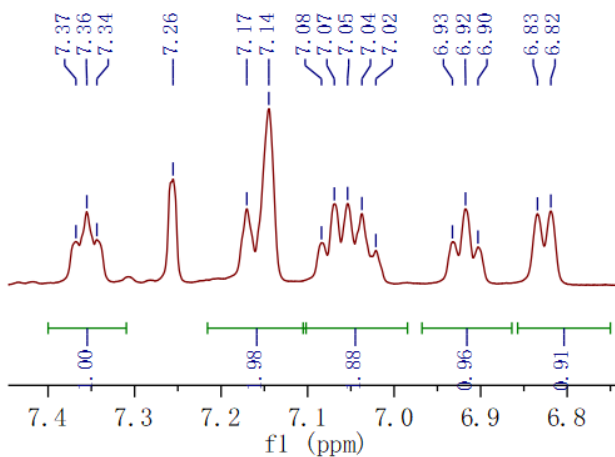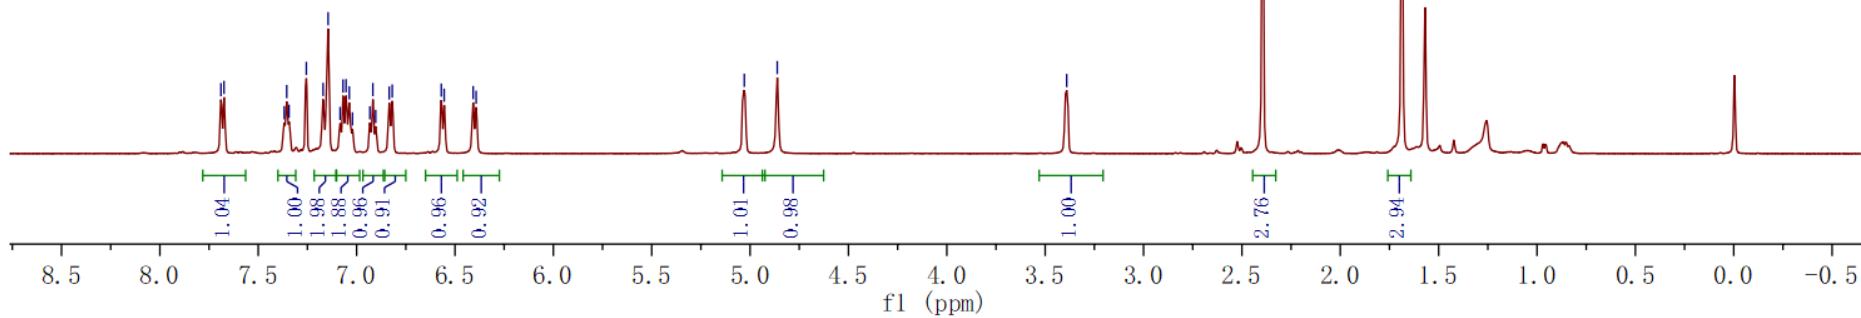

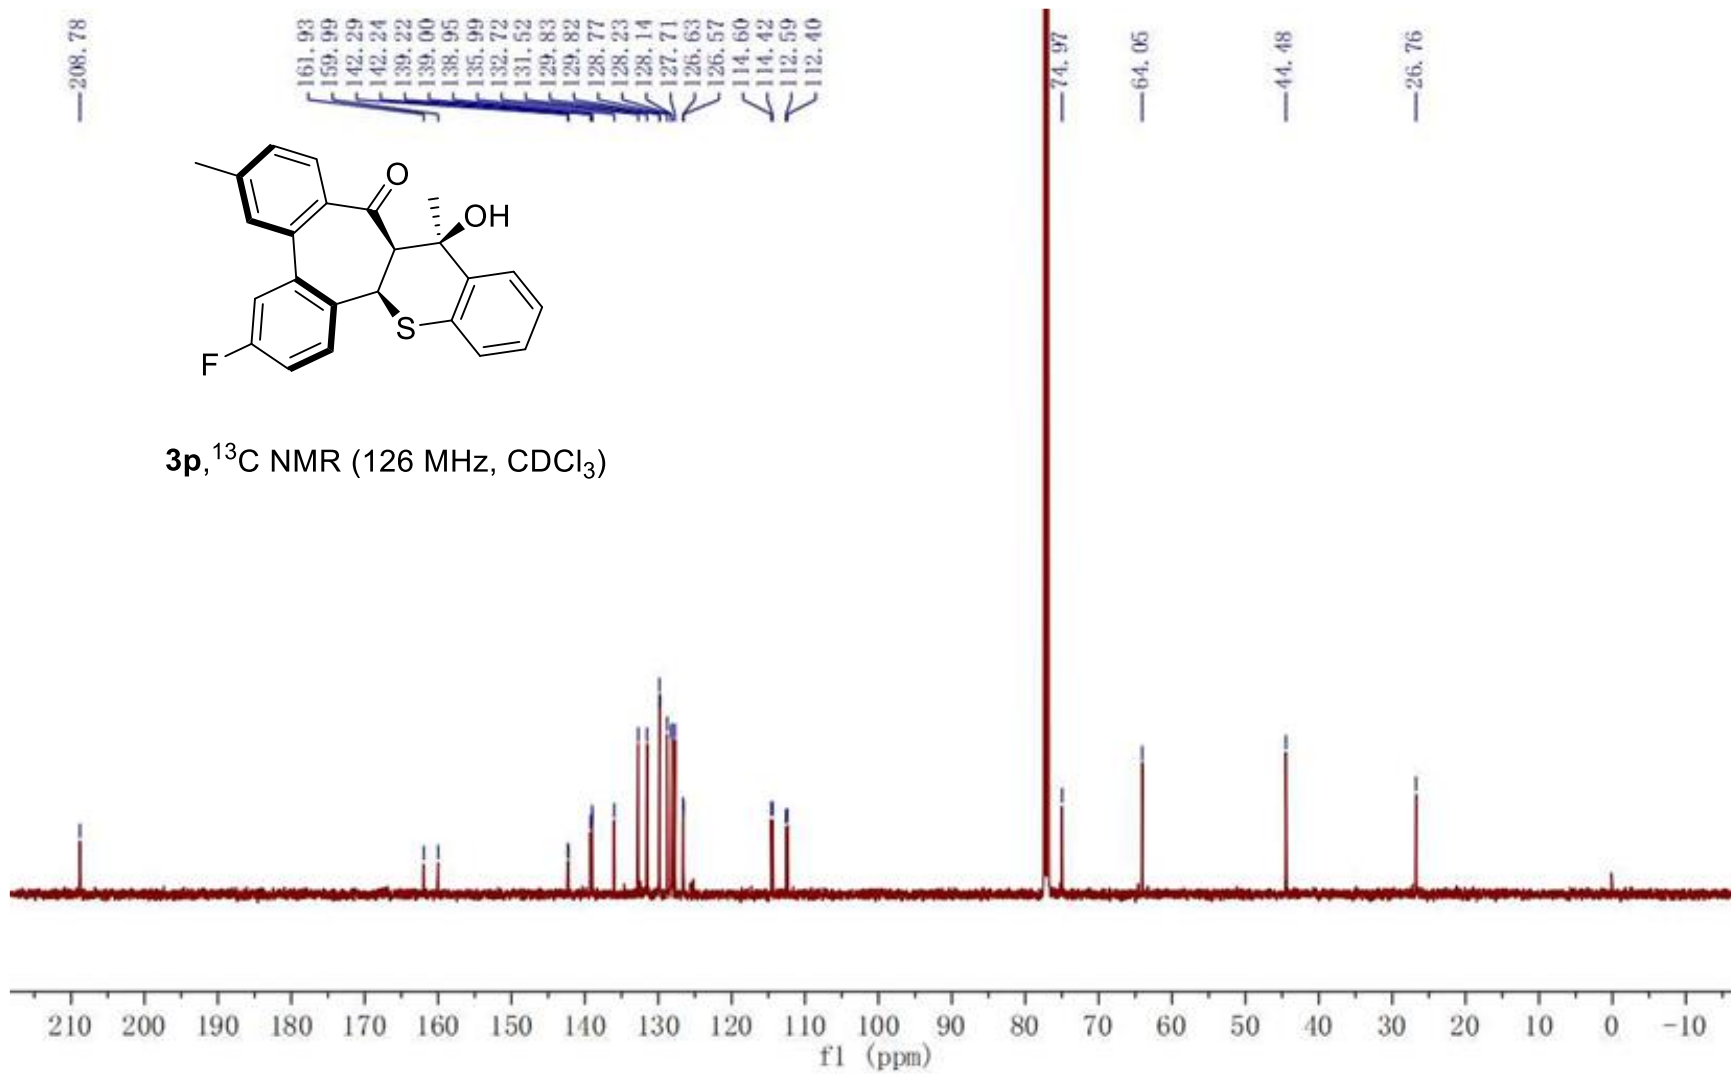

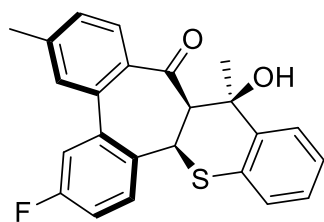

**3p**,  $^{19}\text{F}$  NMR (377 MHz,  $\text{CDCl}_3$ )

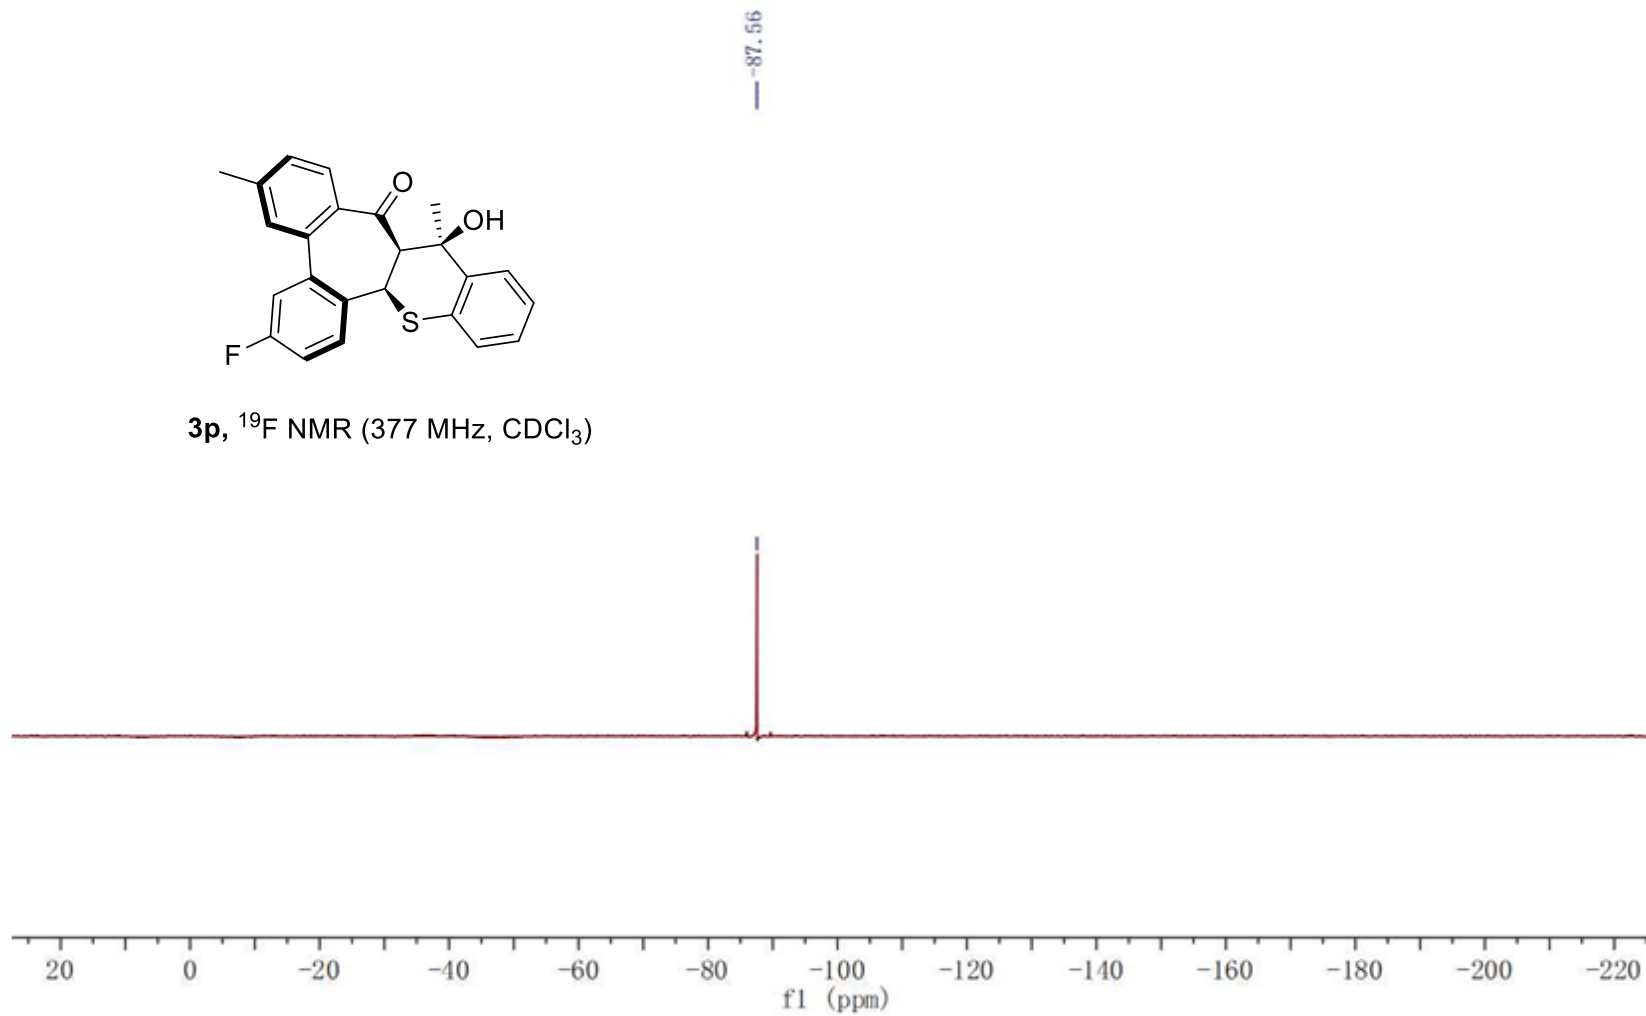



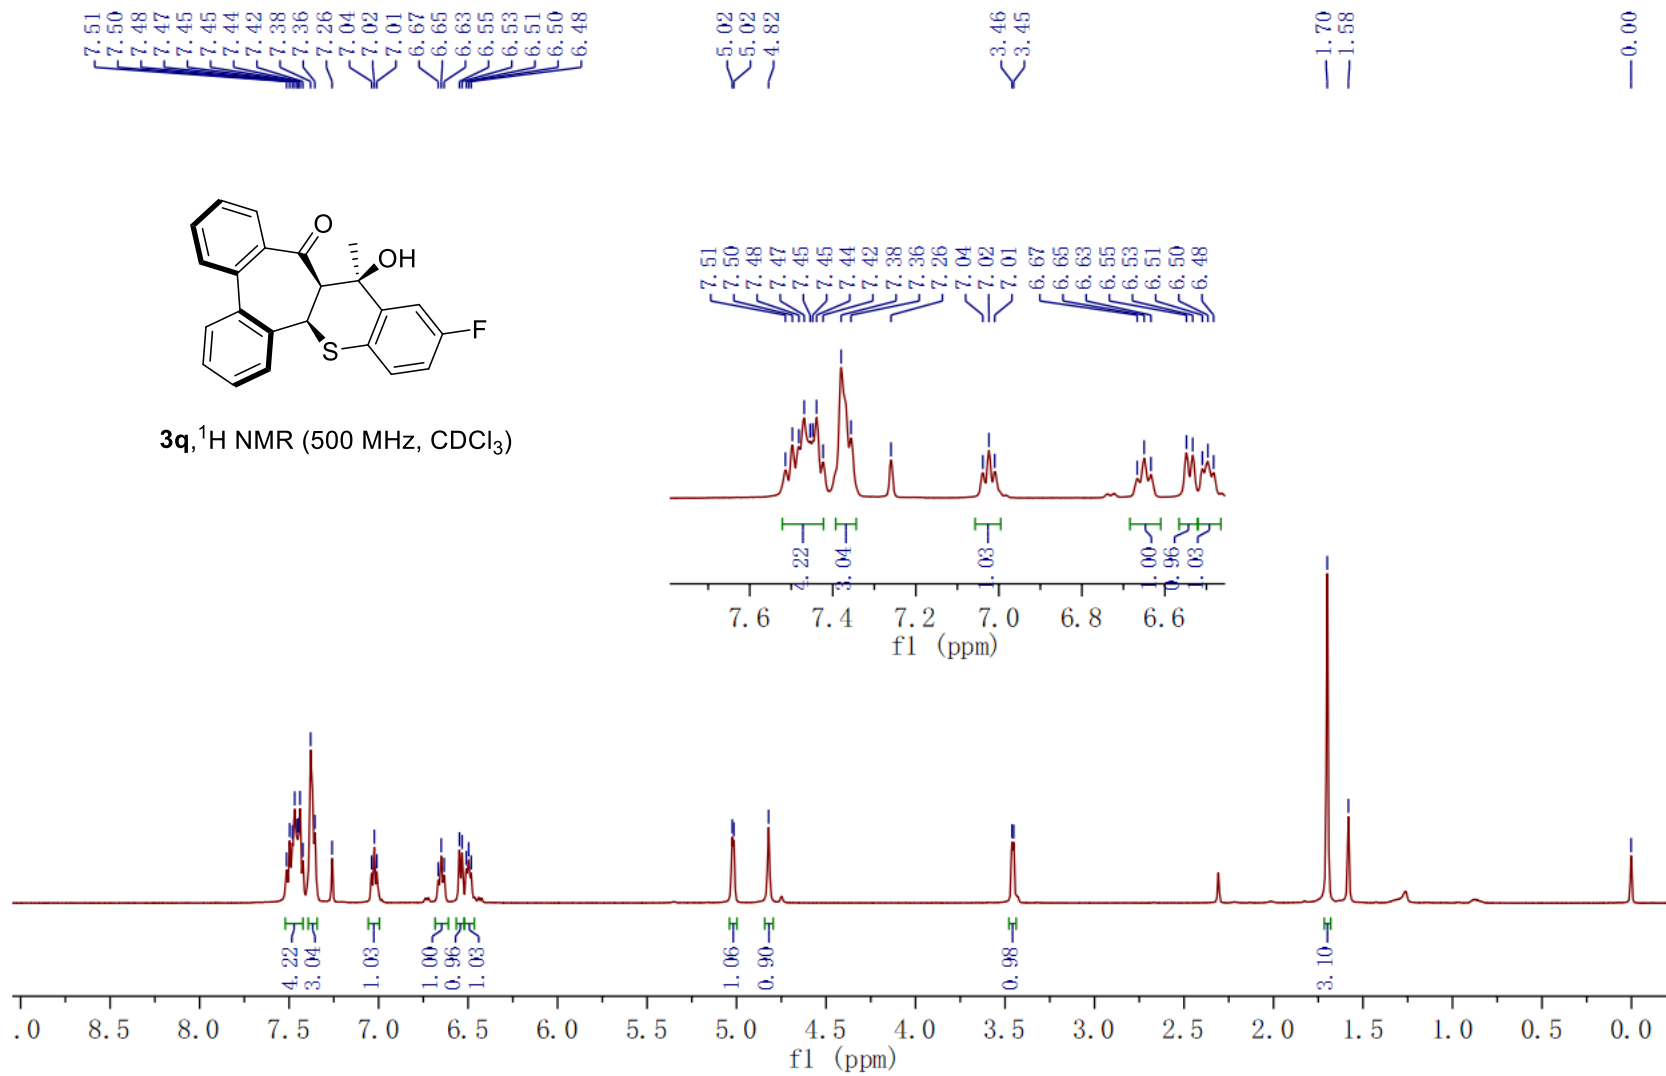

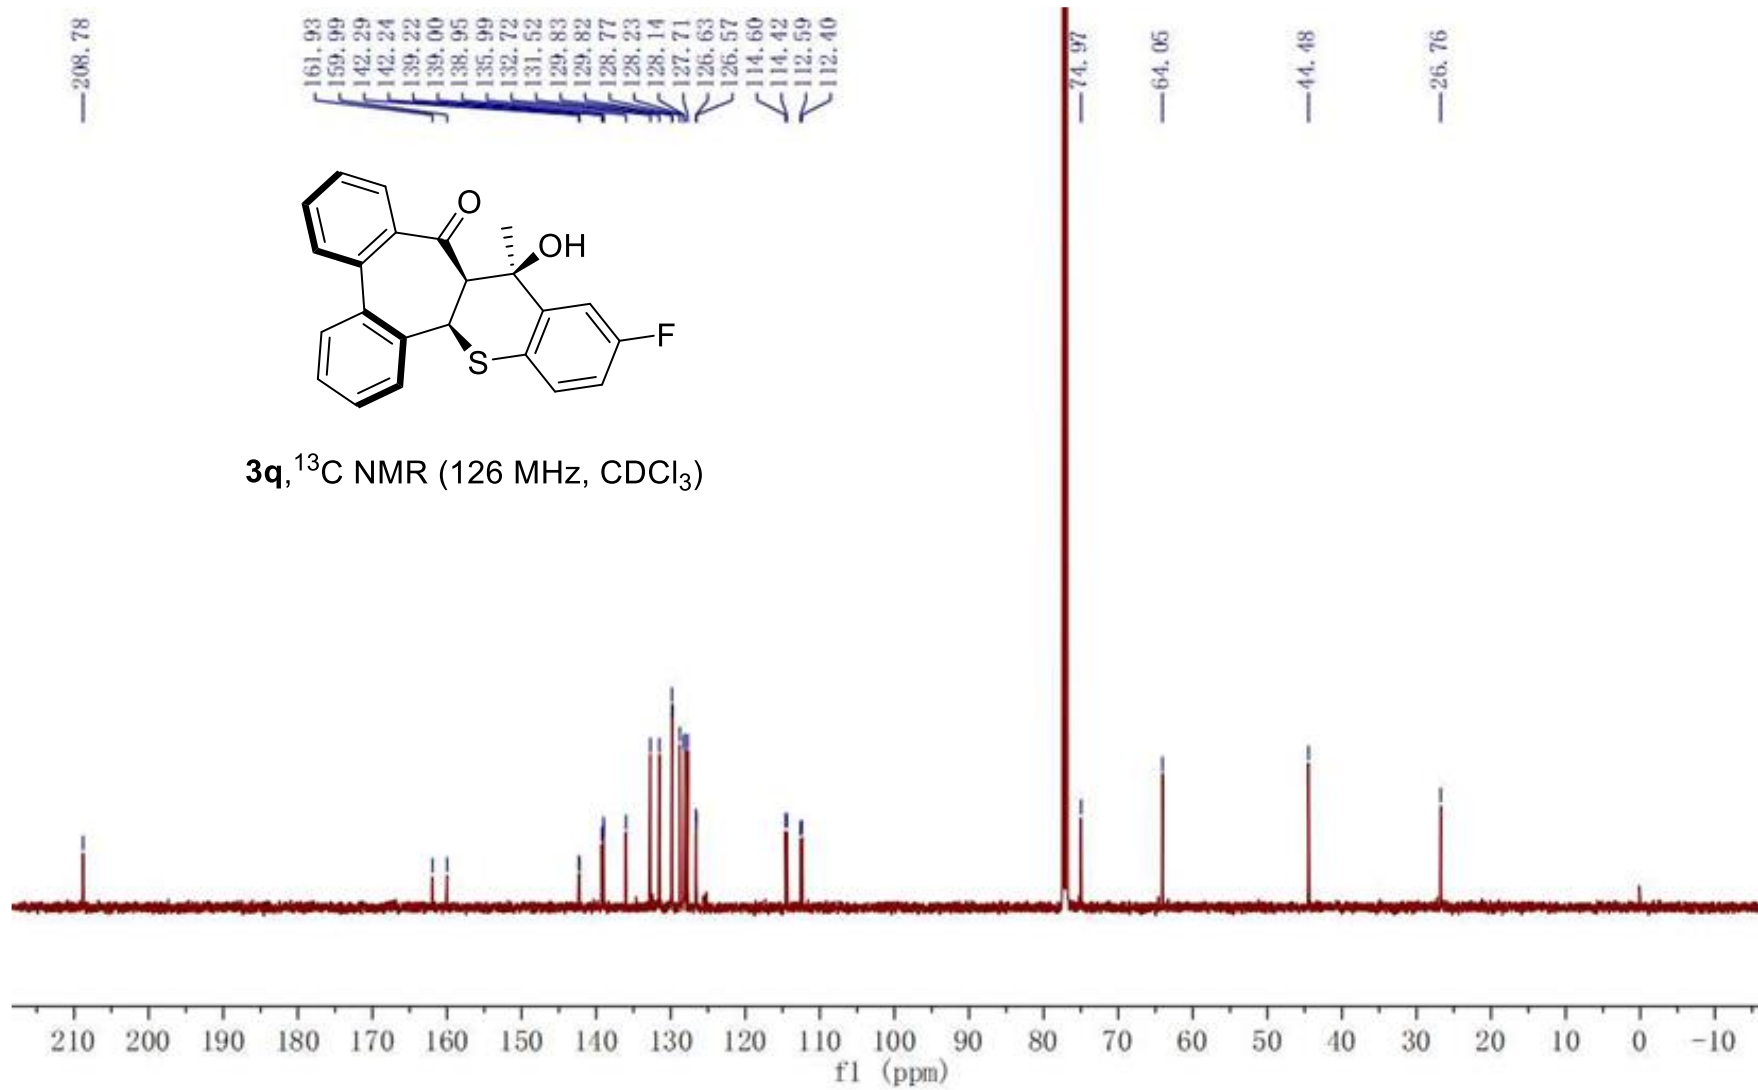

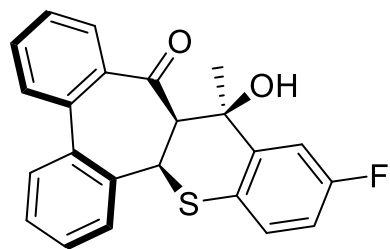

**3q**,  $^{19}\text{F}$  NMR (377 MHz,  $\text{CDCl}_3$ )

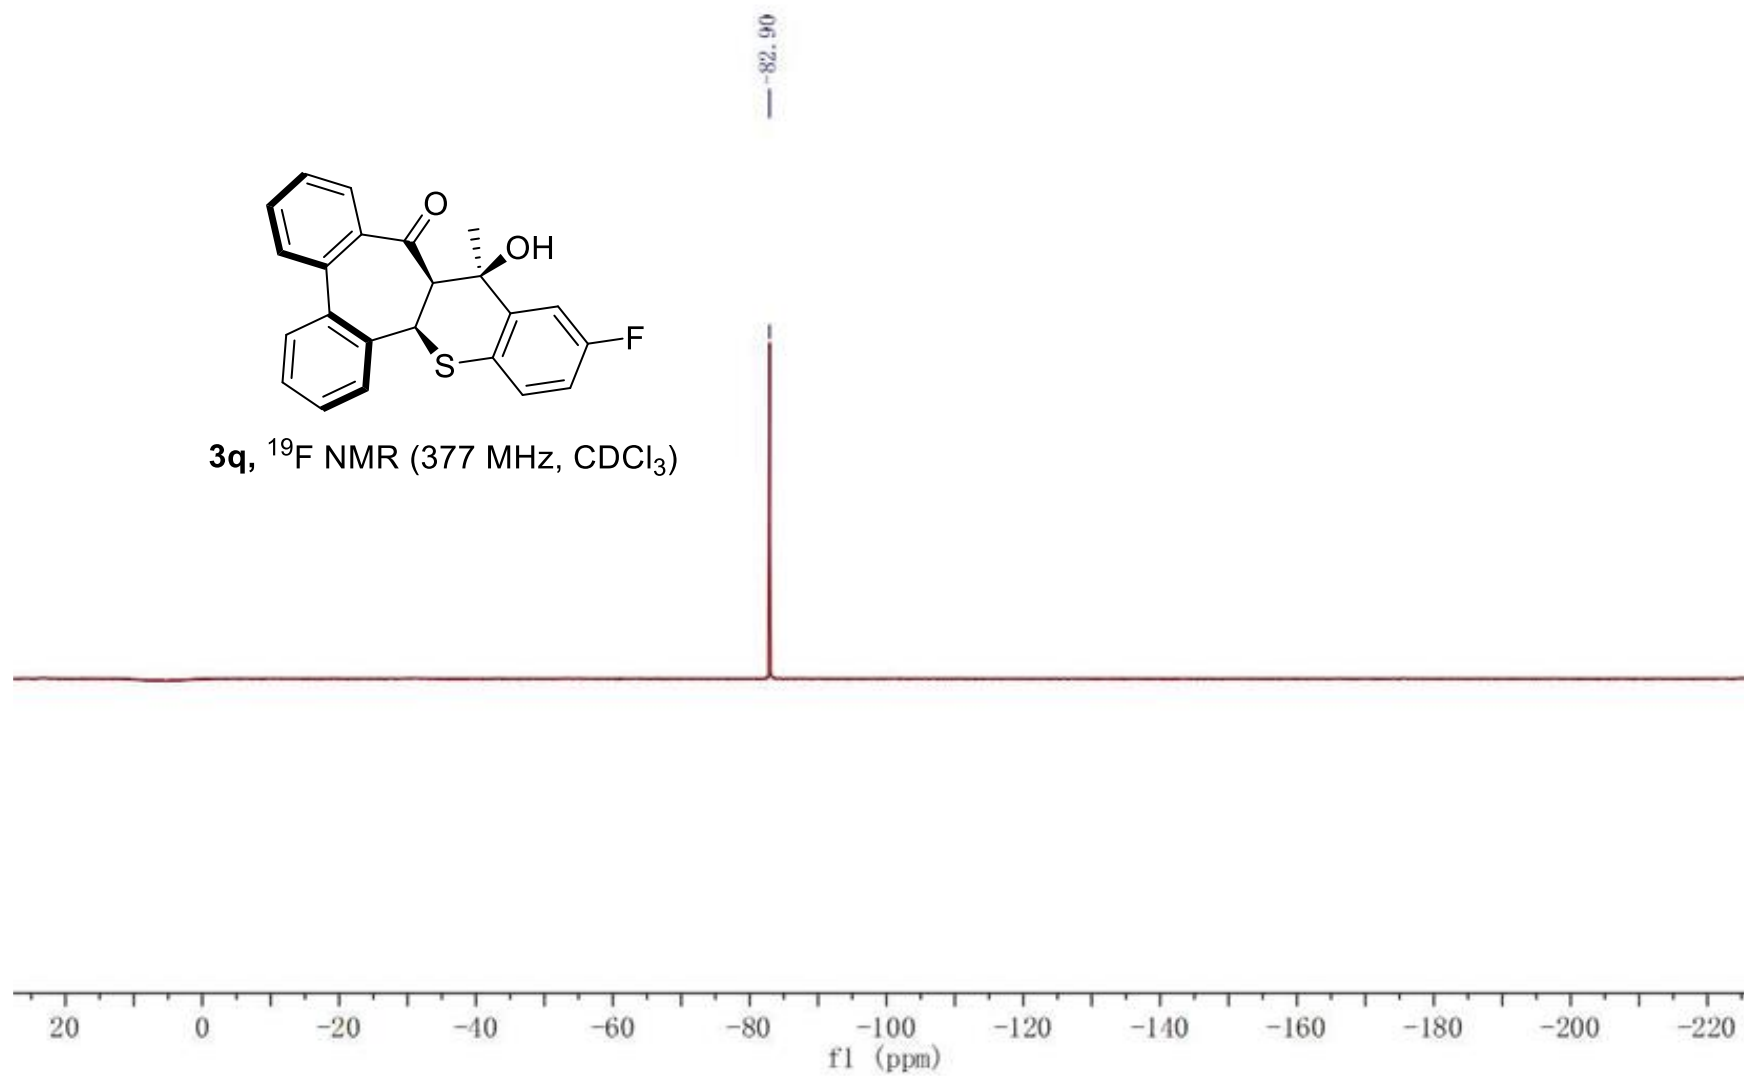

7.70  
7.69  
7.38  
7.37  
7.35  
7.30  
7.30  
7.29  
7.28  
7.25  
7.23  
7.14  
7.12  
7.11  
7.05  
7.03  
7.02  
6.79  
6.77  
6.76  
6.72  
6.70  
6.69  
6.47  
6.45  
6.30  
6.29  
5.70

5.02  
5.00  
4.72  
4.70

3.56  
3.34  
3.33  
3.32

1.60

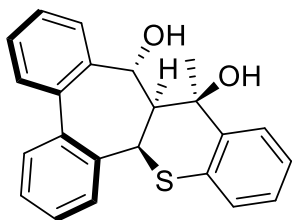

4, <sup>1</sup>H NMR (500 MHz, CDCl<sub>3</sub>)

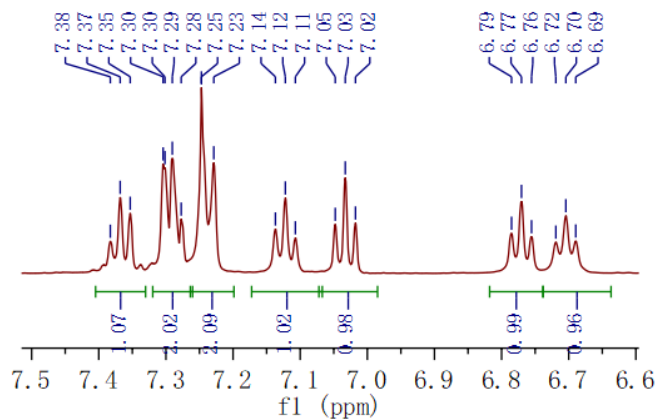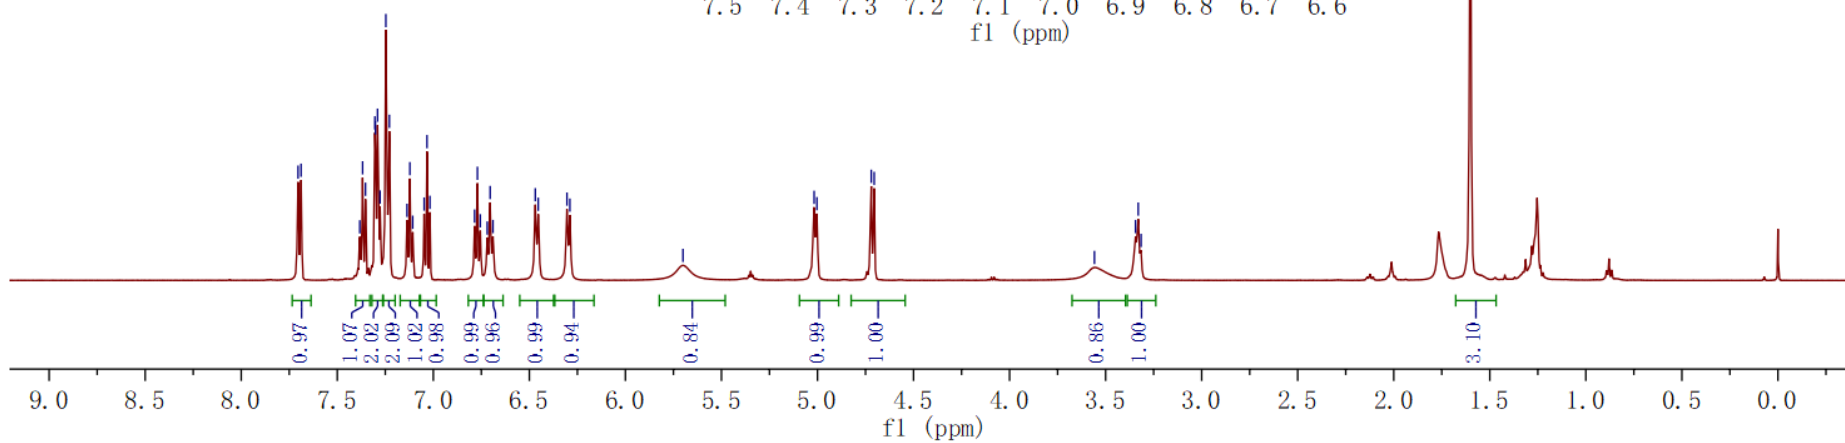

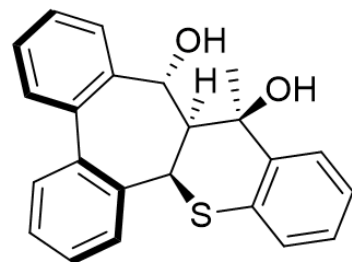

**4**,  $^{13}\text{C}$  NMR (126 MHz,  $\text{CDCl}_3$ )

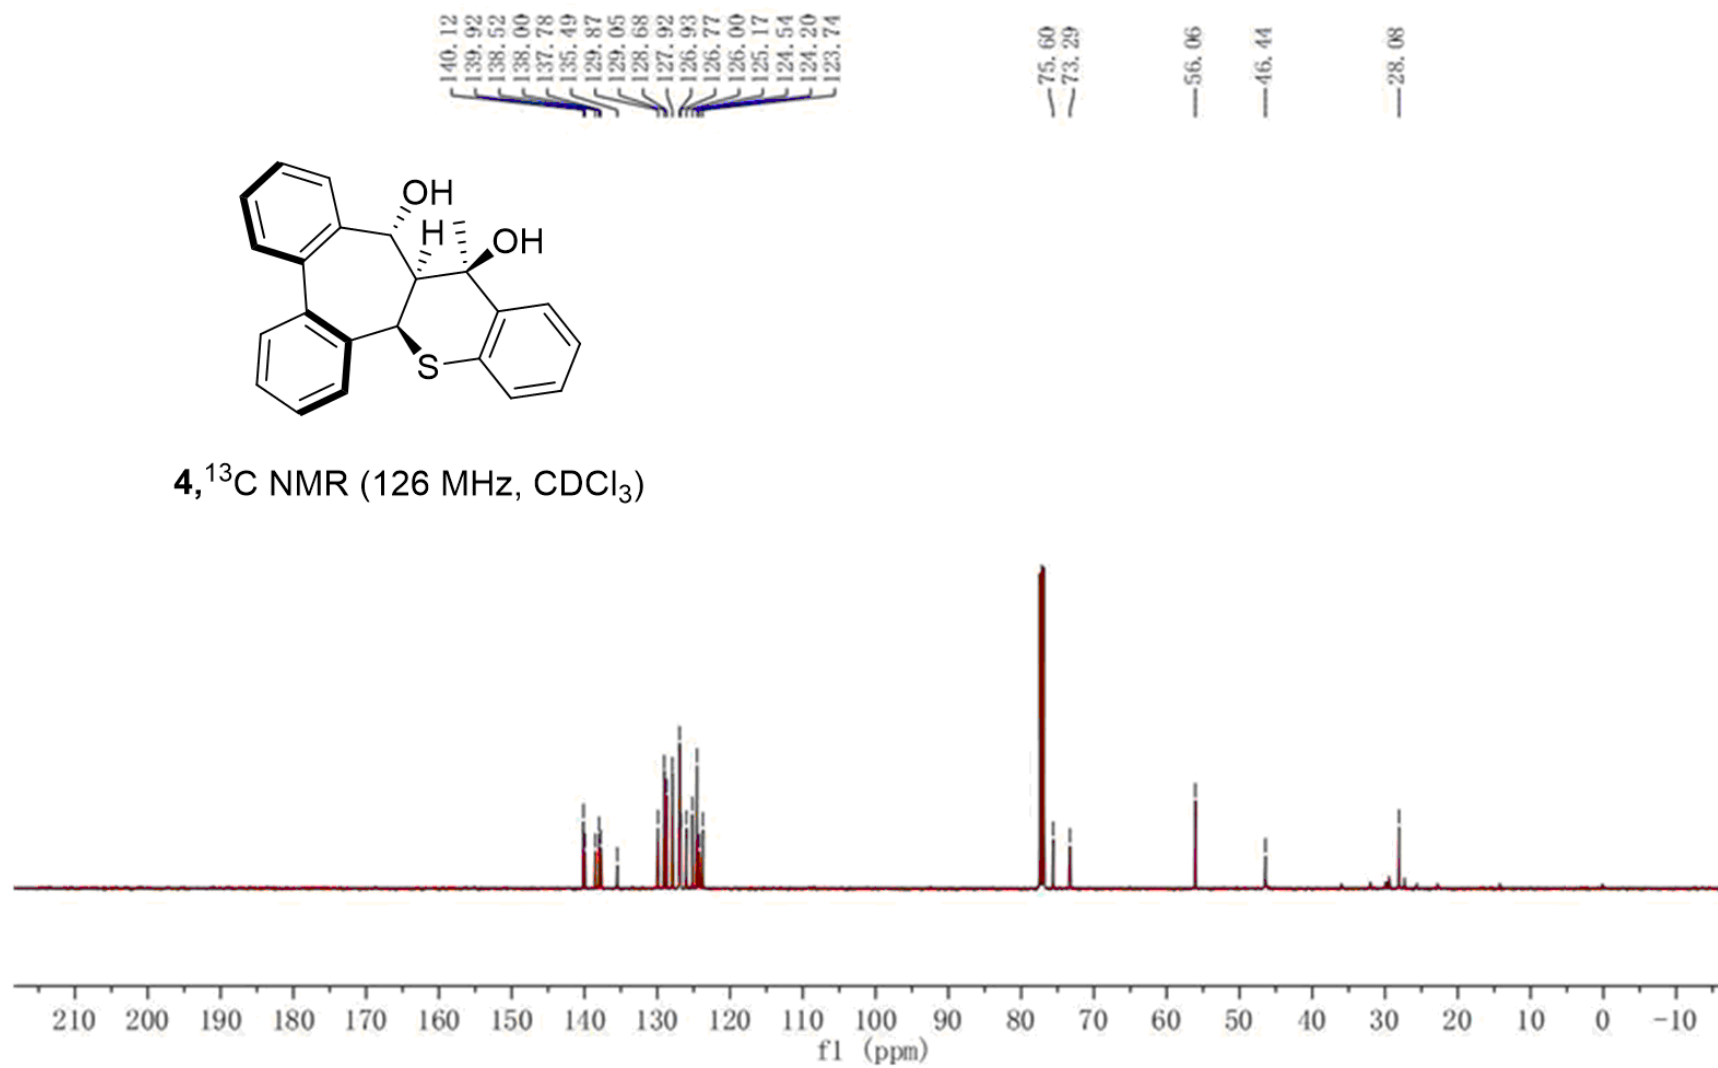

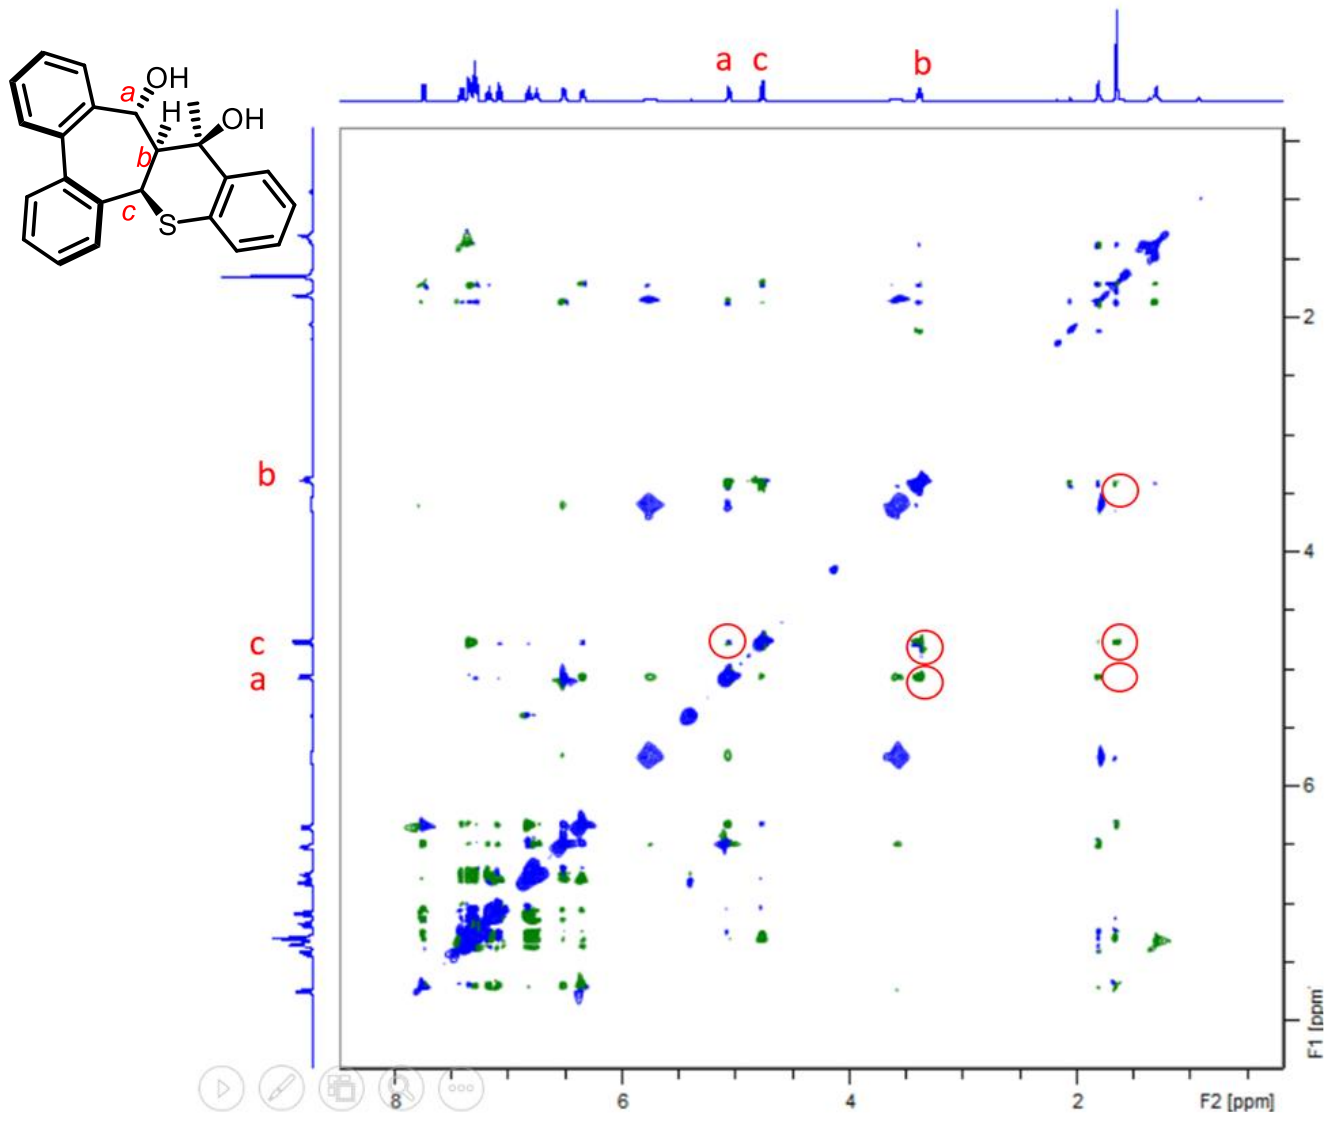

## 9. References

1. Young Lok Choi, Chan-Mo Yu, Bum Tae Kim, Jung-Nyoung Heo, *J. Org. Chem.* **2009**, *74*, 3948.
2. Gaussian 16, Revision C.01, Frisch, M. J.; Trucks, G. W.; Schlegel, H. B.; Scuseria, G. E.; Robb, M. A.; Cheeseman, J. R.; Scalmani, G.; Barone, V.; Petersson, G. A.; Nakatsuji, H.; Li, X.; Caricato, M.; Marenich, A. V.; Bloino, J.; Janesko, B. G.; Gomperts, R.; Mennucci, B.; Hratchian, H. P.; Ortiz, J. V.; Izmaylov, A. F.; Sonnenberg, J. L.; Williams-Young, D.; Ding, F.; Lipparini, F.; Egidi, F.; Goings, J.; Peng, B.; Petrone, A.; Henderson, T.; Ranasinghe, D.; Zakrzewski, V. G.; Gao, J.; Rega, N.; Zheng, G.; Liang, W.; Hada, M.; Ehara, M.; Toyota, K.; Fukuda, R.; Hasegawa, J.; Ishida, M.; Nakajima, T.; Honda, Y.; Kitao, O.; Nakai, H.; Vreven, T.; Throssell, K.; Montgomery, J. A.; Peralta, J. E.; Ogliaro, F.; Bearpark, M. J.; Heyd, J. J.; Brothers, E. N.; Kudin, K. N.; Staroverov, V. N.; Keith, T. A.; Kobayashi, R.; Normand, J.; Rendell, K. A. P.; Burant, J. C.; Iyengar, S. S.; Tomasi, J.; Cossi, M.; Millam, J. M.; Klene, M.; Adamo, C.; Cammi, R.; Ochterski, J. W.; Martin, R. L.; Morokuma, K.; Farkas, O.; Foresman, J. B.; and Fox, D. J., Gaussian, Inc., Wallingford CT, 2019.
3. a) Becke, A. D. Density-functional thermochemistry. III. The role of exact exchange. *J. Chem. Phys.* **1993**, *98*, 5648. b) Lee, C.; Yang, W.; Parr, R. G. Development of the Colle-Salvetti correlation-energy formula into a functional of the electron density. *Phys. Rev. B*, **1988**, *37*, 785.
4. Rassolov, V. A.; Ratner, M. A.; Pople, J. A.; Redfern, P. C.; Curtiss, L. A. 6-31G\* basis set for third-row atoms. *J. Comp. Chem.* **2001**, *22*, 976.
5. Weigend, F.; Ahlrichs, R. Balanced basis sets of split valence, triple zeta valence and quadruple zeta valence quality for H to Rn: Design and assessment of accuracy. *Phys. Chem. Chem. Phys.* **2005**, *7*, 3297.
6. a) Hratchian, H. P.; Schlegel, H. B. Accurate reaction paths using a Hessian based predictor–corrector integrator. *J. Chem. Phys.* **2004**, *120*, 9918. b) Hratchian, H. P.; Schlegel, H. B. Using Hessian Updating to Increase the Efficiency of a Hessian Based Predictor-Corrector Reaction Path Following Method. *J. Chem. Theory Comput.* **2005**, *1*, 61.
7. Marenich, A. V.; Cramer, C. J.; Truhlar, D. G. Universal Solvation Model Based on Solute Electron Density and on a Continuum Model of the Solvent Defined by the Bulk Dielectric Constant and Atomic Surface Tensions. *J. Phys. Chem. B* **2009**, *113*, 6378.
